# Supplementary material for: Effect of process parameters on woody biomass fractionation in a methanol/water mixture in a semi-flow reactor
Source: Royal Society of Chemistry journal article supplement (doi:10.1039/d4ya00261j), 2024-01-01
Supplement: d4ya00261j1.xlsx [file d4ya00261j1.xlsx]

## Sheet: Fig 10
Changes in (a) treatment temperature and (b) the yields of lignin-derived monomers during the treatment of Japanese cedar wood with methanol/water (90/10, v/v) at 10 or 30 MPa at a flow rate of 5 mL min−1
(a) Treatment temperature			(b) Yield of coniferyl alcohol (CA) and its γ-methyl ether (CA- γ)
			(wt% on lignin basis)
				CA		CA-γ		Sum of CA and CA-γ
time (min)	temp (oC)		time (min)	10MPa	30MPa	10MPa	30MPa	10MPa	30MPa
0	147.2		0	0.000315646	0.000254195	0	0	0.000315646	0.000254195
1	155.1		1	0.000610611	0.000490294	0	0	0.000610611	0.000490294
2	163		2	0.0010445	0.000868451	0	0	0.0010445	0.000868451
3	171		3	0.00186917	0.00153691	0	0	0.00186917	0.00153691
4	179		4	0.0030781	0.00261319	0	0	0.0030781	0.00261319
5	186.8		5	0.00501584	0.00428288	0	2.87662e-05	0.00501584	0.00431165
6	194.7		6	0.00779839	0.00698948	6.60346e-05	8.94805e-05	0.00786442	0.00707896
7	202.6		7	0.0121253	0.0110597	0.000188376	0.000332077	0.0123137	0.0113918
8	210.4		8	0.0182683	0.0164108	0.000523478	0.00100807	0.0187918	0.0174189
9	218.3		9	0.0265041	0.0228809	0.00163076	0.00253487	0.0281349	0.0254158
10	226.2		10	0.0349421	0.0305154	0.00390063	0.00549347	0.0388428	0.0360089
11	234.6		11	0.0421753	0.0371488	0.0074655	0.00969472	0.0496408	0.0468435
12	242		12	0.0502128	0.0426018	0.0120914	0.0148997	0.0623043	0.0575015
13	248.8		13	0.0579264	0.0467149	0.0167972	0.0210909	0.0747237	0.0678058
14	255.4		14	0.0649922	0.0495857	0.0203387	0.0270813	0.0853309	0.076667
15	261.2		15	0.0709643	0.0524023	0.0210152	0.0329354	0.0919795	0.0853377
16	266		16	0.0759428	0.0525259	0.0189934	0.0371008	0.0949361	0.0896266
17	269.2		17	0.0817365	0.0509022	0.0172324	0.0392285	0.0989689	0.0901307
18	270.4		18	0.0876228	0.0505376	0.0177665	0.0417947	0.105389	0.0923322
19	269.8		19	0.0944649	0.0474183	0.0165248	0.0426685	0.11099	0.0900868
20	268.9		20	0.0854584	0.0464602	0.0138438	0.0425969	0.0993021	0.0890571
21	268.7		21	0.0741986	0.0429192	0.0111719	0.0336234	0.0853706	0.0765426
22	269.2		22	0.0663505	0.037998	0.00945147	0.0244804	0.0758019	0.0624783
23	269.5		23	0.056405	0.0319531	0.00759337	0.0181031	0.0639984	0.0500562
24	269.7		24	0.0519477	0.0270502	0.00683533	0.0138387	0.058783	0.0408889
25	269.6		25	0.0457114	0.023471	0.00577883	0.0108288	0.0514902	0.0342999
26	269.8		26	0.0402232	0.0201423	0.00492581	0.00849501	0.045149	0.0286373
27	270.1		27	0.0340507	0.0174314	0.00402357	0.0068345	0.0380743	0.0242659
28	270		28	0.0316563	0.015682	0.00368476	0.00578389	0.0353411	0.0214659
29	270		29	0.0286888	0.0143255	0.00327474	0.00508477	0.0319636	0.0194102
30	270.1		30	0.0257717	0.0131491	0.00288455	0.00456749	0.0286562	0.0177166
31	270.1		31	0.0233611	0.0122866	0.00258142	0.00423568	0.0259426	0.0165223
32	270.1		32	0.021562	0.0112517	0.00236822	0.00389111	0.0239302	0.0151428
33	270.1		33	0.0198406	0.010385	0.0021582	0.00359335	0.0219988	0.0139784
34	270.1		34	0.0183974	0.00960528	0.00198753	0.0033237	0.0203849	0.012929
35	270.1		35	0.0170495	0.00882555	0.00182907	0.00305405	0.0188785	0.0118796
36	270.1		36	0.0160888	0.00813683	0.00173283	0.00281481	0.0178217	0.0109516
37	270.1		37	0.0148397	0.00758742	0.00159237	0.00264112	0.0164321	0.0102285
38	270.1		38	0.0134132	0.00685793	0.00142665	0.00237597	0.0148398	0.0092339
39	270.1		39	0.0133891	0.00634653	0.00142183	0.00221271	0.0148109	0.00855924
40	270.1		40	0.0127425	0.00592155	0.00135087	0.00207607	0.0140934	0.00799762
41	270.1		41	0.0117011	0.00545015	0.00124509	0.00190872	0.0129462	0.00735887
42	270.1		42	0.0110617	0.00505551	0.00117449	0.00178043	0.0122362	0.00683594
43	270.1		43	0.010307	0.0048481	0.00109207	0.00171273	0.0113991	0.00656083
44	270.1		44	0.0102132	0.00449546	0.00108203	0.00158746	0.0112952	0.00608292
45	270.1		45	0.00940412	0.00422088	0.000991405	0.00151274	0.0103955	0.00573362
46	270.1		46	0.00923774	0.00389137	0.000976331	0.00139139	0.0102141	0.00528277
47	270.1		47	0.00875338	0.0036852	0.000924406	0.00132651	0.00967778	0.0050117
48	270.1
49	270.1
