# Supplementary material for: Effect of process parameters on woody biomass fractionation in a methanol/water mixture in a semi-flow reactor
Source: Royal Society of Chemistry journal article supplement (doi:10.1039/d4ya00261j), 2024-01-01
Supplement: d4ya00261j3.xlsx [file d4ya00261j3.xlsx]

## Sheet: (a) 5 mL min-1
Composition of the insoluble residue after the treatment of holocellulose with methanol/water (90/10, v/v) at the flow rate of 5 mL min−1
Raw Data			Cellulose	Hemicellulose	Lignin
	Untreated holocellulose		72.0038	23.4262	4.57
	10MPa		23.955	1.56974	2.00107
	20MPa		36.2327	2.83315	1.87097
	30MPa		35.9778	2.60169	4.90318
Original holocellulose composition basis			Cellulose	Hemicellulose	Lignin
	Untreated holocellulose		1	1	1
	10MPa		0.33269	0.0670078	0.437872
	20MPa		0.503206	0.120939	0.409402
	30MPa		0.499666	0.111059	1.07291

## Sheet: (b) 10 mL min-1
Composition of the insoluble residue after the treatment of holocellulose with methanol/water (90/10, v/v) at the flow rate of 10 mL min−1
Raw Data			Cellulose	Hemicellulose	Lignin
	Untreated holocellulose		72.0038	23.4262	4.57
	10MPa		23.487	0.850564	0.271373
	20MPa		45.0006	3.37578	0.458364
	30MPa		45.4875	3.26449	0.462718
Original holocellulose composition basis			Cellulose	Hemicellulose	Lignin
	Untreated holocellulose		1	1	1
	10MPa		0.326192	0.0363082	0.0593814
	20MPa		0.624975	0.144103	0.100299
	30MPa		0.631737	0.139352	0.101251
