# Supplementary material for: Effect of process parameters on woody biomass fractionation in a methanol/water mixture in a semi-flow reactor
Source: Royal Society of Chemistry journal article supplement (doi:10.1039/d4ya00261j), 2024-01-01
Supplement: d4ya00261j5.xlsx [file d4ya00261j5.xlsx]

## Sheet: GPC chromatograms
Gel permeation chromatograms of the soluble fractions after the treatment of Japanese cedar wood
Elution time (min)	Intensity * solvent volume (104 mV*mL)
	(a) methanol/water = 9/1, 270℃, 5 mL min-1			(b) methanol/water = 9/1, 270℃, 10MPa			(c) neat methanol, 270℃, 5 mL min-1			(d) neat water, 230℃, 5 mL min-1
	10MPa	20MPa	30MPa	5 mL min-1	10 mL min-1	20 mL min-1	10MPa	20MPa	30MPa	10MPa	20MPa	30MPa
40	-1364	-1290	-874	-1364	-1215	-1147	28	-587	-949	-728	-558	-428
40.0083	-1363	-1290	-880	-1363	-1221	-1154	34	-587	-946	-733	-565	-425
40.0167	-1358	-1286	-878	-1358	-1226	-1154	38	-586	-946	-732	-574	-427
40.025	-1354	-1287	-873	-1354	-1223	-1149	37	-586	-945	-734	-572	-438
40.0333	-1356	-1285	-868	-1356	-1217	-1146	33	-590	-940	-735	-565	-451
40.0417	-1360	-1291	-866	-1360	-1213	-1149	27	-594	-937	-736	-568	-454
40.05	-1359	-1291	-866	-1359	-1212	-1145	23	-592	-933	-735	-569	-451
40.0583	-1357	-1286	-866	-1357	-1216	-1132	21	-589	-930	-729	-562	-451
40.0667	-1357	-1279	-865	-1357	-1220	-1130	26	-589	-930	-715	-560	-455
40.075	-1351	-1280	-867	-1351	-1216	-1133	31	-590	-932	-710	-559	-456
40.0833	-1349	-1281	-861	-1349	-1212	-1138	33	-589	-932	-712	-556	-458
40.0917	-1348	-1278	-858	-1348	-1205	-1139	33	-588	-934	-711	-551	-461
40.1	-1349	-1285	-858	-1349	-1204	-1136	32	-590	-939	-711	-557	-465
40.1083	-1353	-1289	-859	-1353	-1210	-1137	33	-591	-935	-716	-560	-465
40.1167	-1355	-1284	-861	-1355	-1222	-1141	33	-588	-932	-728	-547	-466
40.125	-1354	-1284	-857	-1354	-1232	-1146	34	-582	-931	-727	-528	-454
40.1333	-1354	-1287	-852	-1354	-1235	-1149	31	-579	-931	-721	-516	-443
40.1417	-1353	-1291	-851	-1353	-1231	-1147	32	-581	-931	-722	-518	-439
40.15	-1354	-1297	-852	-1354	-1225	-1146	31	-586	-932	-720	-524	-448
40.1583	-1354	-1303	-856	-1354	-1220	-1149	31	-590	-931	-714	-529	-457
40.1667	-1360	-1310	-861	-1360	-1219	-1150	28	-594	-925	-711	-529	-464
40.175	-1364	-1310	-862	-1364	-1221	-1148	29	-599	-922	-712	-525	-465
40.1833	-1364	-1300	-857	-1364	-1220	-1147	30	-604	-920	-709	-526	-459
40.1917	-1359	-1292	-854	-1359	-1217	-1152	30	-601	-920	-704	-523	-449
40.2	-1354	-1295	-857	-1354	-1217	-1158	26	-598	-920	-701	-516	-448
40.2083	-1356	-1298	-859	-1356	-1214	-1157	23	-596	-918	-698	-517	-446
40.2167	-1357	-1300	-857	-1357	-1215	-1153	21	-593	-916	-694	-521	-445
40.225	-1353	-1302	-855	-1353	-1216	-1148	19	-594	-916	-693	-522	-442
40.2333	-1351	-1303	-858	-1351	-1212	-1143	21	-596	-918	-697	-524	-440
40.2417	-1353	-1299	-853	-1353	-1213	-1140	25	-591	-919	-694	-532	-439
40.25	-1348	-1294	-853	-1348	-1216	-1143	28	-586	-919	-691	-541	-439
40.2583	-1344	-1288	-856	-1344	-1218	-1152	29	-581	-918	-688	-544	-436
40.2667	-1354	-1286	-858	-1354	-1225	-1160	33	-580	-917	-686	-538	-437
40.275	-1363	-1286	-859	-1363	-1227	-1159	34	-579	-913	-685	-530	-440
40.2833	-1369	-1287	-863	-1369	-1222	-1156	30	-577	-910	-680	-534	-444
40.2917	-1370	-1287	-867	-1370	-1217	-1156	29	-579	-909	-679	-536	-451
40.3	-1367	-1291	-867	-1367	-1215	-1160	30	-582	-907	-682	-539	-457
40.3083	-1369	-1297	-859	-1369	-1215	-1153	26	-588	-905	-695	-541	-459
40.3167	-1373	-1296	-856	-1373	-1217	-1142	22	-589	-902	-701	-545	-463
40.325	-1372	-1294	-856	-1372	-1221	-1139	18	-591	-900	-710	-550	-460
40.3333	-1367	-1292	-856	-1367	-1223	-1136	16	-591	-899	-720	-540	-456
40.3417	-1364	-1287	-851	-1364	-1225	-1140	20	-588	-898	-723	-531	-455
40.35	-1362	-1288	-848	-1362	-1226	-1146	24	-584	-891	-718	-529	-455
40.3583	-1355	-1293	-849	-1355	-1224	-1145	25	-582	-885	-715	-536	-458
40.3667	-1347	-1295	-852	-1347	-1224	-1136	26	-581	-885	-717	-536	-464
40.375	-1345	-1293	-855	-1345	-1230	-1130	31	-581	-879	-716	-539	-455
40.3833	-1348	-1293	-854	-1348	-1237	-1129	29	-577	-878	-716	-543	-443
40.3917	-1353	-1292	-852	-1353	-1237	-1132	25	-572	-877	-716	-546	-436
40.4	-1362	-1293	-855	-1362	-1233	-1135	24	-571	-876	-711	-536	-435
40.4083	-1371	-1295	-856	-1371	-1237	-1145	20	-574	-874	-706	-532	-433
40.4167	-1371	-1295	-859	-1371	-1239	-1149	20	-579	-869	-702	-532	-431
40.425	-1365	-1293	-861	-1365	-1237	-1153	19	-581	-871	-698	-528	-431
40.4333	-1368	-1286	-864	-1368	-1235	-1155	19	-585	-872	-692	-524	-436
40.4417	-1372	-1276	-862	-1372	-1234	-1158	23	-584	-868	-686	-521	-444
40.45	-1373	-1269	-856	-1373	-1233	-1156	28	-579	-867	-681	-527	-450
40.4583	-1370	-1274	-849	-1370	-1236	-1149	30	-581	-862	-674	-533	-457
40.4667	-1366	-1277	-840	-1366	-1240	-1150	29	-577	-860	-669	-530	-466
40.475	-1366	-1281	-836	-1366	-1240	-1148	24	-571	-859	-670	-524	-475
40.4833	-1368	-1287	-835	-1368	-1241	-1149	22	-571	-862	-676	-516	-477
40.4917	-1366	-1287	-841	-1366	-1241	-1150	25	-572	-868	-684	-512	-468
40.5	-1364	-1287	-847	-1364	-1235	-1151	26	-572	-864	-687	-514	-466
40.5083	-1358	-1286	-852	-1358	-1230	-1154	24	-571	-857	-680	-515	-464
40.5167	-1352	-1288	-851	-1352	-1229	-1148	27	-574	-851	-675	-510	-467
40.525	-1356	-1284	-848	-1356	-1231	-1145	33	-575	-842	-680	-507	-469
40.5333	-1360	-1281	-850	-1360	-1233	-1147	36	-570	-839	-689	-507	-475
40.5417	-1357	-1279	-849	-1357	-1235	-1155	33	-565	-839	-687	-509	-472
40.55	-1357	-1279	-849	-1357	-1242	-1159	28	-567	-837	-692	-515	-467
40.5583	-1359	-1287	-851	-1359	-1243	-1162	22	-566	-830	-698	-518	-465
40.5667	-1361	-1290	-852	-1361	-1240	-1165	18	-565	-822	-699	-523	-460
40.575	-1359	-1291	-847	-1359	-1233	-1160	23	-566	-816	-698	-524	-458
40.5833	-1358	-1290	-840	-1358	-1225	-1150	28	-569	-815	-696	-529	-451
40.5917	-1356	-1289	-837	-1356	-1223	-1145	27	-570	-813	-695	-537	-443
40.6	-1354	-1289	-838	-1354	-1225	-1148	23	-574	-812	-690	-539	-449
40.6083	-1356	-1282	-842	-1356	-1228	-1148	18	-573	-809	-695	-539	-461
40.6167	-1353	-1280	-839	-1353	-1232	-1150	18	-568	-802	-700	-538	-463
40.625	-1355	-1279	-836	-1355	-1233	-1147	20	-566	-794	-699	-538	-470
40.6333	-1363	-1278	-836	-1363	-1230	-1145	20	-564	-794	-693	-538	-471
40.6417	-1362	-1278	-841	-1362	-1230	-1148	22	-561	-796	-684	-534	-469
40.65	-1358	-1280	-842	-1358	-1233	-1151	23	-562	-793	-677	-529	-471
40.6583	-1353	-1282	-842	-1353	-1233	-1151	26	-563	-787	-681	-524	-473
40.6667	-1351	-1280	-838	-1351	-1241	-1152	32	-567	-781	-684	-522	-474
40.675	-1343	-1275	-835	-1343	-1243	-1158	34	-566	-777	-684	-516	-472
40.6833	-1344	-1273	-831	-1344	-1239	-1157	31	-564	-772	-681	-517	-472
40.6917	-1347	-1272	-827	-1347	-1239	-1161	31	-562	-768	-672	-525	-467
40.7	-1351	-1277	-820	-1351	-1240	-1160	31	-561	-763	-657	-531	-466
40.7083	-1354	-1285	-816	-1354	-1235	-1157	31	-563	-758	-645	-523	-471
40.7167	-1355	-1288	-816	-1355	-1234	-1148	29	-564	-747	-643	-516	-475
40.725	-1360	-1287	-818	-1360	-1237	-1140	28	-562	-738	-649	-512	-474
40.7333	-1368	-1286	-816	-1368	-1236	-1138	25	-556	-735	-654	-507	-473
40.7417	-1374	-1287	-814	-1374	-1236	-1139	25	-550	-740	-660	-496	-477
40.75	-1374	-1284	-818	-1374	-1240	-1142	29	-549	-740	-670	-491	-476
40.7583	-1374	-1283	-822	-1374	-1243	-1144	32	-547	-735	-680	-495	-474
40.7667	-1369	-1282	-818	-1369	-1244	-1146	33	-544	-732	-683	-504	-474
40.775	-1364	-1289	-815	-1364	-1247	-1150	34	-545	-730	-682	-509	-474
40.7833	-1362	-1292	-814	-1362	-1244	-1159	35	-547	-724	-686	-509	-474
40.7917	-1363	-1288	-813	-1363	-1244	-1167	35	-549	-717	-686	-508	-477
40.8	-1360	-1285	-813	-1360	-1244	-1171	31	-544	-714	-689	-515	-480
40.8083	-1355	-1286	-815	-1355	-1240	-1171	30	-541	-708	-691	-517	-479
40.8167	-1355	-1287	-813	-1355	-1234	-1164	26	-540	-707	-693	-512	-479
40.825	-1361	-1287	-813	-1361	-1232	-1158	22	-540	-706	-688	-501	-474
40.8333	-1357	-1289	-806	-1357	-1233	-1156	22	-543	-702	-681	-492	-475
40.8417	-1357	-1289	-795	-1357	-1239	-1152	27	-545	-692	-684	-492	-484
40.85	-1359	-1283	-798	-1359	-1241	-1147	32	-542	-682	-697	-492	-489
40.8583	-1359	-1280	-801	-1359	-1241	-1146	35	-533	-674	-700	-495	-479
40.8667	-1365	-1278	-803	-1365	-1235	-1143	36	-524	-671	-695	-501	-467
40.875	-1367	-1280	-802	-1367	-1229	-1144	34	-524	-668	-687	-501	-460
40.8833	-1366	-1280	-797	-1366	-1228	-1148	28	-524	-665	-676	-505	-460
40.8917	-1364	-1278	-794	-1364	-1224	-1144	26	-517	-657	-676	-511	-466
40.9	-1369	-1277	-796	-1369	-1222	-1139	25	-511	-645	-678	-511	-471
40.9083	-1366	-1272	-794	-1366	-1224	-1140	31	-507	-639	-682	-510	-472
40.9167	-1367	-1267	-789	-1367	-1226	-1147	34	-503	-636	-685	-510	-470
40.925	-1368	-1263	-780	-1368	-1222	-1148	35	-503	-633	-691	-507	-470
40.9333	-1369	-1262	-772	-1369	-1224	-1152	33	-505	-624	-700	-509	-472
40.9417	-1369	-1258	-769	-1369	-1235	-1156	32	-506	-609	-706	-514	-478
40.95	-1364	-1257	-772	-1364	-1240	-1157	31	-503	-596	-710	-512	-483
40.9583	-1359	-1259	-774	-1359	-1244	-1159	28	-504	-592	-707	-507	-483
40.9667	-1355	-1258	-773	-1355	-1249	-1161	19	-502	-590	-698	-506	-476
40.975	-1354	-1251	-766	-1354	-1250	-1161	16	-497	-584	-701	-510	-470
40.9833	-1360	-1252	-760	-1360	-1253	-1158	13	-493	-571	-707	-511	-466
40.9917	-1364	-1259	-755	-1364	-1256	-1156	16	-491	-565	-707	-511	-468
41	-1366	-1263	-751	-1366	-1256	-1161	19	-487	-565	-700	-511	-469
41.0083	-1370	-1263	-750	-1370	-1257	-1169	24	-481	-559	-697	-512	-463
41.0167	-1371	-1258	-749	-1371	-1258	-1170	29	-473	-549	-696	-511	-463
41.025	-1369	-1255	-746	-1369	-1250	-1167	29	-471	-543	-697	-508	-473
41.0333	-1369	-1254	-742	-1369	-1249	-1163	28	-470	-537	-696	-500	-480
41.0417	-1369	-1254	-740	-1369	-1246	-1161	32	-469	-532	-701	-494	-485
41.05	-1372	-1255	-740	-1372	-1244	-1160	33	-471	-530	-709	-499	-488
41.0583	-1372	-1253	-743	-1372	-1247	-1161	33	-475	-523	-714	-502	-485
41.0667	-1369	-1239	-741	-1369	-1245	-1160	33	-476	-512	-717	-508	-479
41.075	-1365	-1239	-740	-1365	-1242	-1159	32	-471	-499	-719	-508	-481
41.0833	-1365	-1239	-736	-1365	-1234	-1156	36	-465	-488	-724	-509	-479
41.0917	-1365	-1240	-733	-1365	-1231	-1148	39	-461	-477	-720	-511	-479
41.1	-1367	-1247	-726	-1367	-1235	-1144	29	-458	-465	-712	-506	-481
41.1083	-1369	-1245	-727	-1369	-1239	-1142	22	-460	-454	-707	-498	-481
41.1167	-1365	-1238	-731	-1365	-1241	-1144	25	-457	-445	-704	-490	-483
41.125	-1363	-1236	-726	-1363	-1240	-1142	28	-454	-440	-705	-505	-488
41.1333	-1369	-1239	-717	-1369	-1243	-1143	29	-453	-430	-708	-516	-478
41.1417	-1376	-1244	-708	-1376	-1246	-1149	27	-449	-420	-708	-518	-470
41.15	-1377	-1246	-706	-1377	-1247	-1156	26	-447	-410	-702	-515	-469
41.1583	-1371	-1244	-705	-1371	-1242	-1160	24	-446	-399	-698	-514	-464
41.1667	-1361	-1241	-703	-1361	-1237	-1167	24	-442	-390	-690	-519	-461
41.175	-1359	-1233	-695	-1359	-1234	-1164	23	-438	-380	-680	-519	-460
41.1833	-1358	-1227	-688	-1358	-1239	-1161	19	-430	-365	-681	-523	-457
41.1917	-1354	-1227	-686	-1354	-1247	-1156	20	-424	-355	-685	-520	-451
41.2	-1357	-1226	-682	-1357	-1248	-1154	24	-420	-346	-692	-521	-454
41.2083	-1352	-1228	-680	-1352	-1248	-1158	27	-417	-343	-701	-520	-457
41.2167	-1350	-1225	-678	-1350	-1247	-1158	29	-411	-338	-699	-524	-456
41.225	-1352	-1220	-670	-1352	-1246	-1161	26	-400	-328	-697	-525	-463
41.2333	-1352	-1215	-662	-1352	-1247	-1163	24	-393	-316	-701	-525	-469
41.2417	-1350	-1214	-657	-1350	-1249	-1160	27	-386	-304	-701	-525	-468
41.25	-1345	-1221	-658	-1345	-1252	-1161	32	-381	-292	-698	-528	-475
41.2583	-1345	-1218	-662	-1345	-1253	-1162	38	-379	-281	-694	-528	-484
41.2667	-1350	-1209	-662	-1350	-1254	-1160	42	-377	-269	-689	-531	-483
41.275	-1360	-1205	-656	-1360	-1255	-1163	38	-372	-259	-688	-535	-476
41.2833	-1370	-1204	-652	-1370	-1259	-1167	30	-370	-247	-686	-532	-467
41.2917	-1371	-1201	-649	-1371	-1262	-1168	20	-366	-231	-682	-524	-464
41.3	-1359	-1203	-644	-1359	-1259	-1167	14	-361	-216	-677	-523	-471
41.3083	-1353	-1202	-642	-1353	-1255	-1162	17	-355	-206	-670	-531	-476
41.3167	-1355	-1197	-637	-1355	-1250	-1155	19	-349	-196	-666	-535	-472
41.325	-1360	-1189	-634	-1360	-1240	-1155	19	-346	-187	-664	-540	-471
41.3333	-1362	-1189	-632	-1362	-1234	-1157	17	-338	-172	-670	-542	-473
41.3417	-1365	-1194	-628	-1365	-1238	-1157	17	-327	-151	-682	-543	-476
41.35	-1366	-1198	-623	-1366	-1244	-1153	20	-317	-135	-686	-544	-478
41.3583	-1362	-1193	-612	-1362	-1243	-1154	21	-310	-122	-685	-545	-474
41.3667	-1355	-1184	-603	-1355	-1240	-1163	23	-311	-105	-684	-543	-466
41.375	-1353	-1180	-598	-1353	-1245	-1172	25	-312	-90	-679	-542	-452
41.3833	-1354	-1177	-595	-1354	-1258	-1176	26	-308	-80	-667	-540	-435
41.3917	-1356	-1176	-587	-1356	-1262	-1178	28	-301	-70	-656	-541	-429
41.4	-1360	-1183	-579	-1360	-1261	-1179	34	-294	-54	-653	-539	-435
41.4083	-1356	-1193	-573	-1356	-1261	-1179	35	-291	-39	-655	-537	-439
41.4167	-1347	-1189	-561	-1347	-1261	-1181	35	-284	-26	-666	-541	-433
41.425	-1344	-1184	-550	-1344	-1258	-1179	31	-281	-14	-668	-537	-436
41.4333	-1351	-1177	-546	-1351	-1249	-1170	29	-274	3	-664	-541	-447
41.4417	-1354	-1176	-538	-1354	-1245	-1164	28	-267	23	-666	-538	-462
41.45	-1354	-1173	-531	-1354	-1242	-1167	26	-257	40	-665	-530	-472
41.4583	-1357	-1170	-531	-1357	-1237	-1169	26	-245	57	-666	-526	-472
41.4667	-1361	-1167	-529	-1361	-1235	-1169	26	-241	72	-663	-528	-477
41.475	-1361	-1168	-525	-1361	-1234	-1161	24	-237	86	-657	-535	-483
41.4833	-1361	-1165	-520	-1361	-1236	-1157	24	-229	102	-661	-543	-481
41.4917	-1363	-1159	-508	-1363	-1244	-1155	26	-222	118	-667	-546	-482
41.5	-1360	-1156	-497	-1360	-1251	-1150	29	-215	132	-668	-547	-478
41.5083	-1356	-1153	-489	-1356	-1251	-1158	33	-209	144	-671	-542	-471
41.5167	-1357	-1149	-484	-1357	-1248	-1170	33	-201	159	-666	-533	-462
41.525	-1363	-1148	-481	-1363	-1245	-1176	32	-190	182	-660	-529	-450
41.5333	-1364	-1149	-478	-1364	-1249	-1179	26	-178	207	-661	-533	-441
41.5417	-1361	-1142	-477	-1361	-1248	-1175	17	-168	224	-662	-533	-449
41.55	-1356	-1141	-477	-1356	-1247	-1172	12	-161	245	-674	-535	-457
41.5583	-1354	-1144	-470	-1354	-1245	-1178	16	-154	266	-681	-538	-466
41.5667	-1359	-1149	-459	-1359	-1241	-1181	22	-148	282	-685	-536	-470
41.575	-1361	-1153	-446	-1361	-1239	-1180	28	-143	296	-683	-535	-468
41.5833	-1362	-1146	-434	-1362	-1244	-1176	29	-139	312	-679	-541	-464
41.5917	-1361	-1131	-426	-1361	-1256	-1173	25	-132	333	-678	-549	-463
41.6	-1358	-1122	-419	-1358	-1262	-1170	22	-126	355	-680	-547	-464
41.6083	-1359	-1120	-412	-1359	-1264	-1163	23	-119	376	-682	-542	-466
41.6167	-1356	-1117	-398	-1356	-1266	-1161	23	-104	398	-688	-544	-466
41.625	-1357	-1115	-385	-1357	-1266	-1163	23	-91	420	-689	-544	-465
41.6333	-1357	-1115	-373	-1357	-1261	-1169	26	-82	433	-684	-548	-471
41.6417	-1360	-1114	-364	-1360	-1258	-1174	31	-70	451	-685	-558	-475
41.65	-1360	-1109	-356	-1360	-1257	-1177	31	-54	474	-690	-554	-477
41.6583	-1353	-1107	-351	-1353	-1260	-1180	25	-47	502	-696	-534	-471
41.6667	-1354	-1110	-344	-1354	-1261	-1174	24	-39	528	-705	-520	-470
41.675	-1362	-1107	-340	-1362	-1261	-1171	25	-29	548	-701	-517	-469
41.6833	-1364	-1099	-336	-1364	-1261	-1170	23	-18	570	-694	-523	-467
41.6917	-1364	-1094	-329	-1364	-1261	-1168	18	-7	590	-689	-533	-469
41.7	-1365	-1091	-319	-1365	-1260	-1166	16	-1	611	-686	-539	-469
41.7083	-1367	-1089	-305	-1367	-1261	-1163	15	5	634	-678	-546	-467
41.7167	-1370	-1083	-297	-1370	-1262	-1165	19	12	659	-673	-546	-464
41.725	-1372	-1078	-292	-1372	-1260	-1164	20	23	679	-675	-543	-473
41.7333	-1373	-1073	-283	-1373	-1260	-1159	18	36	701	-678	-538	-475
41.7417	-1373	-1071	-270	-1373	-1260	-1156	20	49	729	-677	-544	-475
41.75	-1369	-1069	-258	-1369	-1262	-1161	27	60	755	-683	-560	-482
41.7583	-1356	-1066	-247	-1356	-1264	-1164	30	72	779	-689	-562	-495
41.7667	-1345	-1055	-239	-1345	-1264	-1166	28	83	804	-691	-560	-499
41.775	-1341	-1047	-227	-1341	-1265	-1167	25	98	827	-693	-560	-502
41.7833	-1347	-1045	-209	-1347	-1263	-1165	25	117	848	-694	-557	-498
41.7917	-1353	-1039	-191	-1353	-1259	-1166	20	133	868	-693	-556	-493
41.8	-1356	-1030	-178	-1356	-1259	-1167	19	149	890	-692	-559	-487
41.8083	-1361	-1027	-167	-1361	-1256	-1170	21	164	912	-692	-562	-480
41.8167	-1369	-1028	-155	-1369	-1253	-1168	27	179	939	-690	-559	-475
41.825	-1372	-1021	-145	-1372	-1253	-1168	29	193	969	-686	-555	-475
41.8333	-1368	-1014	-136	-1368	-1254	-1167	28	203	996	-686	-551	-481
41.8417	-1358	-1009	-127	-1358	-1256	-1167	29	212	1022	-692	-555	-482
41.85	-1350	-1007	-117	-1350	-1256	-1168	30	223	1051	-704	-561	-478
41.8583	-1354	-1009	-100	-1354	-1262	-1171	28	236	1082	-706	-565	-478
41.8667	-1357	-1002	-85	-1357	-1270	-1174	26	256	1114	-700	-564	-477
41.875	-1360	-993	-75	-1360	-1274	-1173	26	272	1140	-697	-559	-476
41.8833	-1365	-981	-61	-1365	-1274	-1168	28	285	1165	-697	-552	-473
41.8917	-1369	-974	-51	-1369	-1271	-1159	27	300	1194	-695	-552	-468
41.9	-1372	-971	-42	-1372	-1269	-1151	31	311	1227	-686	-557	-471
41.9083	-1368	-961	-31	-1368	-1269	-1151	33	327	1258	-679	-567	-476
41.9167	-1358	-948	-21	-1358	-1272	-1153	32	346	1282	-665	-570	-480
41.925	-1349	-940	-11	-1349	-1270	-1159	32	366	1312	-661	-569	-479
41.9333	-1345	-941	1	-1345	-1261	-1162	33	381	1349	-663	-564	-477
41.9417	-1346	-947	15	-1346	-1257	-1166	33	394	1381	-668	-569	-473
41.95	-1350	-942	37	-1350	-1255	-1166	29	408	1408	-672	-576	-475
41.9583	-1354	-936	63	-1354	-1256	-1161	29	427	1440	-672	-580	-476
41.9667	-1354	-933	84	-1354	-1252	-1161	30	449	1474	-666	-591	-477
41.975	-1355	-927	102	-1355	-1251	-1156	32	466	1503	-665	-598	-486
41.9833	-1350	-919	113	-1350	-1251	-1157	39	481	1534	-661	-595	-490
41.9917	-1348	-914	122	-1348	-1251	-1162	42	495	1567	-659	-594	-488
42	-1346	-908	131	-1346	-1253	-1165	44	510	1603	-653	-592	-491
42.0083	-1346	-899	145	-1346	-1250	-1169	46	526	1637	-651	-587	-498
42.0167	-1351	-892	160	-1351	-1247	-1171	45	550	1671	-654	-584	-498
42.025	-1355	-890	177	-1355	-1248	-1174	45	571	1705	-649	-582	-489
42.0333	-1357	-879	193	-1357	-1254	-1177	42	594	1737	-645	-582	-484
42.0417	-1354	-869	200	-1354	-1253	-1179	34	618	1773	-640	-582	-486
42.05	-1347	-864	206	-1347	-1247	-1180	26	642	1813	-631	-581	-484
42.0583	-1345	-862	218	-1345	-1247	-1176	24	661	1850	-631	-578	-477
42.0667	-1340	-850	235	-1340	-1252	-1172	23	673	1879	-634	-570	-472
42.075	-1334	-836	253	-1334	-1254	-1175	27	685	1907	-641	-566	-470
42.0833	-1340	-825	271	-1340	-1255	-1177	30	703	1938	-654	-565	-468
42.0917	-1352	-818	289	-1352	-1257	-1171	30	725	1975	-666	-568	-475
42.1	-1359	-813	308	-1359	-1261	-1166	27	749	2020	-673	-568	-483
42.1083	-1359	-808	331	-1359	-1264	-1170	26	774	2061	-667	-576	-481
42.1167	-1359	-797	354	-1359	-1259	-1178	30	796	2094	-659	-579	-480
42.125	-1353	-788	372	-1353	-1258	-1178	32	818	2126	-657	-574	-480
42.1333	-1348	-786	387	-1348	-1260	-1176	36	838	2162	-652	-564	-485
42.1417	-1344	-787	400	-1344	-1264	-1172	45	853	2201	-647	-555	-487
42.15	-1342	-785	418	-1342	-1263	-1167	46	869	2241	-652	-552	-486
42.1583	-1342	-777	439	-1342	-1258	-1166	44	888	2278	-666	-554	-481
42.1667	-1347	-770	460	-1347	-1256	-1166	41	909	2317	-671	-558	-482
42.175	-1351	-758	473	-1351	-1254	-1166	36	934	2358	-671	-563	-485
42.1833	-1349	-741	486	-1349	-1252	-1167	33	956	2398	-664	-571	-490
42.1917	-1349	-729	502	-1349	-1254	-1167	33	975	2435	-664	-576	-492
42.2	-1352	-729	518	-1352	-1256	-1168	33	996	2475	-665	-570	-489
42.2083	-1357	-728	538	-1357	-1259	-1163	31	1021	2519	-659	-559	-487
42.2167	-1353	-715	560	-1353	-1266	-1161	34	1050	2565	-666	-556	-485
42.225	-1346	-706	582	-1346	-1267	-1163	36	1081	2609	-669	-554	-485
42.2333	-1344	-703	607	-1344	-1267	-1170	34	1107	2648	-667	-557	-489
42.2417	-1346	-695	628	-1346	-1271	-1178	36	1132	2686	-659	-566	-488
42.25	-1350	-684	649	-1350	-1273	-1178	41	1156	2732	-660	-569	-485
42.2583	-1355	-672	671	-1355	-1264	-1171	43	1181	2781	-661	-565	-497
42.2667	-1353	-654	692	-1353	-1254	-1161	43	1204	2828	-667	-563	-511
42.275	-1352	-634	710	-1352	-1254	-1157	46	1231	2872	-670	-560	-512
42.2833	-1354	-624	731	-1354	-1260	-1165	50	1259	2913	-671	-560	-503
42.2917	-1355	-618	749	-1355	-1264	-1167	50	1285	2959	-672	-560	-497
42.3	-1356	-606	773	-1356	-1261	-1164	51	1314	3006	-669	-557	-492
42.3083	-1354	-596	800	-1354	-1264	-1158	52	1341	3054	-669	-552	-492
42.3167	-1351	-588	823	-1351	-1268	-1154	55	1367	3099	-672	-554	-491
42.325	-1347	-577	848	-1347	-1266	-1153	56	1390	3147	-670	-562	-491
42.3333	-1344	-560	873	-1344	-1262	-1154	57	1410	3191	-669	-572	-482
42.3417	-1347	-545	897	-1347	-1259	-1158	57	1437	3237	-663	-571	-476
42.35	-1355	-532	917	-1355	-1258	-1159	61	1460	3283	-654	-570	-479
42.3583	-1358	-519	939	-1358	-1263	-1156	65	1488	3327	-652	-570	-482
42.3667	-1356	-512	965	-1356	-1268	-1155	68	1519	3370	-655	-570	-486
42.375	-1359	-506	990	-1359	-1269	-1157	67	1554	3419	-656	-571	-486
42.3833	-1359	-491	1017	-1359	-1263	-1162	62	1587	3469	-645	-569	-488
42.3917	-1360	-475	1045	-1360	-1256	-1161	63	1617	3513	-635	-563	-490
42.4	-1360	-461	1066	-1360	-1253	-1157	65	1645	3557	-629	-558	-487
42.4083	-1358	-449	1091	-1358	-1255	-1152	68	1676	3604	-627	-559	-478
42.4167	-1361	-433	1119	-1361	-1254	-1155	70	1707	3654	-623	-563	-474
42.425	-1367	-430	1142	-1367	-1257	-1153	67	1733	3711	-620	-558	-477
42.4333	-1366	-426	1161	-1366	-1263	-1146	64	1761	3760	-615	-549	-477
42.4417	-1363	-417	1182	-1363	-1264	-1145	67	1791	3805	-613	-541	-479
42.45	-1361	-408	1204	-1361	-1261	-1151	66	1828	3857	-612	-535	-482
42.4583	-1357	-393	1231	-1357	-1260	-1150	67	1866	3911	-613	-536	-488
42.4667	-1354	-374	1262	-1354	-1258	-1149	66	1899	3967	-620	-535	-493
42.475	-1352	-359	1292	-1352	-1257	-1153	68	1936	4024	-626	-539	-491
42.4833	-1354	-343	1325	-1354	-1256	-1154	71	1969	4081	-632	-546	-494
42.4917	-1355	-334	1360	-1355	-1257	-1155	75	1999	4132	-632	-553	-496
42.5	-1353	-322	1387	-1353	-1252	-1152	76	2036	4180	-627	-554	-494
42.5083	-1355	-313	1412	-1355	-1249	-1146	76	2074	4234	-625	-549	-490
42.5167	-1361	-303	1443	-1361	-1251	-1140	79	2110	4286	-619	-549	-482
42.525	-1363	-293	1473	-1363	-1253	-1139	83	2147	4338	-612	-550	-473
42.5333	-1360	-283	1501	-1360	-1253	-1134	85	2180	4396	-613	-555	-474
42.5417	-1359	-266	1530	-1359	-1250	-1133	85	2214	4452	-616	-561	-483
42.55	-1355	-241	1559	-1355	-1250	-1139	87	2245	4506	-618	-562	-486
42.5583	-1357	-230	1590	-1357	-1248	-1146	92	2278	4561	-623	-566	-489
42.5667	-1360	-224	1619	-1360	-1243	-1153	98	2313	4612	-623	-575	-487
42.575	-1362	-210	1653	-1362	-1239	-1158	99	2347	4658	-621	-577	-483
42.5833	-1364	-195	1686	-1364	-1237	-1153	102	2381	4708	-615	-572	-485
42.5917	-1365	-180	1716	-1365	-1235	-1149	103	2418	4764	-610	-566	-489
42.6	-1364	-164	1749	-1364	-1242	-1150	103	2453	4823	-609	-567	-481
42.6083	-1359	-147	1780	-1359	-1253	-1149	107	2485	4885	-614	-571	-475
42.6167	-1357	-133	1809	-1357	-1261	-1146	105	2516	4949	-615	-578	-474
42.625	-1354	-122	1834	-1354	-1262	-1138	101	2549	5015	-614	-589	-470
42.6333	-1353	-109	1861	-1353	-1258	-1129	102	2590	5079	-614	-587	-471
42.6417	-1359	-91	1888	-1359	-1260	-1130	107	2629	5136	-607	-577	-465
42.65	-1366	-72	1917	-1366	-1260	-1128	107	2666	5191	-611	-568	-462
42.6583	-1363	-64	1954	-1363	-1254	-1126	108	2713	5249	-617	-562	-461
42.6667	-1355	-52	1988	-1355	-1249	-1127	110	2760	5310	-623	-554	-459
42.675	-1349	-38	2022	-1349	-1246	-1131	109	2799	5369	-631	-548	-454
42.6833	-1342	-16	2059	-1342	-1246	-1133	111	2842	5430	-637	-538	-439
42.6917	-1342	4	2093	-1342	-1242	-1131	120	2881	5494	-647	-534	-424
42.7	-1342	22	2124	-1342	-1242	-1128	125	2920	5559	-646	-533	-415
42.7083	-1344	41	2155	-1344	-1237	-1127	124	2962	5621	-640	-534	-423
42.7167	-1350	61	2191	-1350	-1232	-1121	123	3001	5680	-645	-533	-443
42.725	-1354	80	2224	-1354	-1230	-1119	123	3042	5740	-653	-535	-461
42.7333	-1353	91	2254	-1353	-1234	-1114	120	3086	5808	-654	-534	-469
42.7417	-1350	96	2284	-1350	-1238	-1112	118	3131	5873	-649	-535	-472
42.75	-1348	109	2320	-1348	-1241	-1113	121	3174	5937	-649	-528	-473
42.7583	-1352	135	2356	-1352	-1243	-1110	126	3218	6005	-656	-525	-474
42.7667	-1352	166	2390	-1352	-1242	-1100	128	3266	6069	-655	-530	-473
42.775	-1354	194	2428	-1354	-1239	-1097	136	3314	6130	-647	-533	-467
42.7833	-1355	218	2469	-1355	-1233	-1098	140	3358	6193	-638	-540	-461
42.7917	-1355	233	2511	-1355	-1226	-1100	141	3402	6259	-635	-541	-457
42.8	-1354	248	2551	-1354	-1224	-1101	138	3447	6326	-635	-543	-459
42.8083	-1356	256	2591	-1356	-1226	-1099	142	3495	6394	-636	-542	-463
42.8167	-1353	265	2629	-1353	-1231	-1099	148	3544	6463	-631	-542	-465
42.825	-1355	284	2662	-1355	-1238	-1097	154	3596	6529	-619	-546	-465
42.8333	-1359	306	2693	-1359	-1238	-1098	156	3643	6598	-612	-548	-466
42.8417	-1359	325	2726	-1359	-1240	-1098	156	3684	6667	-616	-547	-467
42.85	-1359	355	2762	-1359	-1239	-1100	162	3726	6740	-615	-551	-464
42.8583	-1363	385	2805	-1363	-1239	-1106	166	3767	6809	-611	-555	-460
42.8667	-1369	412	2851	-1369	-1227	-1110	167	3809	6878	-606	-557	-453
42.875	-1368	431	2896	-1368	-1221	-1112	170	3856	6949	-600	-560	-444
42.8833	-1368	450	2939	-1368	-1223	-1110	173	3903	7022	-593	-558	-436
42.8917	-1371	471	2980	-1371	-1227	-1104	177	3954	7096	-588	-550	-434
42.9	-1370	492	3017	-1370	-1227	-1097	184	4011	7169	-589	-538	-436
42.9083	-1367	519	3052	-1367	-1221	-1088	190	4062	7236	-585	-531	-441
42.9167	-1365	543	3086	-1365	-1215	-1081	195	4112	7304	-580	-523	-446
42.925	-1361	566	3121	-1361	-1213	-1083	196	4166	7376	-583	-523	-445
42.9333	-1357	589	3162	-1357	-1210	-1089	194	4220	7445	-592	-529	-441
42.9417	-1364	609	3204	-1364	-1205	-1091	196	4265	7516	-591	-530	-442
42.95	-1372	627	3241	-1372	-1205	-1089	199	4311	7586	-585	-527	-443
42.9583	-1374	645	3282	-1374	-1205	-1084	201	4360	7656	-584	-526	-444
42.9667	-1366	662	3328	-1366	-1201	-1080	202	4410	7725	-579	-526	-446
42.975	-1355	679	3374	-1355	-1204	-1078	207	4463	7799	-571	-528	-451
42.9833	-1353	702	3418	-1353	-1208	-1075	209	4521	7879	-564	-526	-448
42.9917	-1353	729	3455	-1353	-1214	-1071	213	4577	7953	-555	-520	-440
43	-1349	753	3497	-1349	-1223	-1071	217	4632	8022	-553	-517	-441
43.0083	-1351	775	3541	-1351	-1225	-1071	219	4688	8095	-548	-514	-437
43.0167	-1347	795	3581	-1347	-1215	-1072	221	4742	8170	-539	-507	-430
43.025	-1347	819	3627	-1347	-1207	-1073	219	4797	8248	-530	-499	-433
43.0333	-1353	842	3675	-1353	-1202	-1070	225	4851	8324	-526	-494	-436
43.0417	-1356	869	3722	-1356	-1206	-1062	234	4904	8397	-534	-496	-442
43.05	-1354	897	3764	-1354	-1210	-1059	242	4958	8468	-544	-498	-437
43.0583	-1360	919	3807	-1360	-1208	-1057	248	5010	8545	-543	-506	-431
43.0667	-1358	938	3851	-1358	-1207	-1051	248	5059	8621	-539	-517	-431
43.075	-1349	955	3896	-1349	-1199	-1044	254	5108	8696	-532	-519	-427
43.0833	-1347	981	3939	-1347	-1194	-1039	262	5161	8775	-529	-525	-422
43.0917	-1349	1010	3981	-1349	-1187	-1039	268	5216	8859	-527	-530	-415
43.1	-1348	1043	4026	-1348	-1184	-1040	277	5273	8937	-526	-526	-409
43.1083	-1348	1071	4073	-1348	-1183	-1039	286	5327	9002	-527	-516	-400
43.1167	-1354	1093	4119	-1354	-1185	-1035	288	5383	9068	-529	-507	-395
43.125	-1358	1121	4166	-1358	-1188	-1038	294	5442	9144	-528	-498	-397
43.1333	-1362	1156	4216	-1362	-1190	-1039	296	5505	9224	-535	-497	-401
43.1417	-1361	1190	4260	-1361	-1187	-1040	297	5569	9306	-539	-505	-405
43.15	-1355	1219	4308	-1355	-1183	-1040	304	5632	9387	-536	-512	-408
43.1583	-1357	1249	4359	-1357	-1177	-1043	311	5694	9469	-529	-514	-410
43.1667	-1360	1274	4412	-1360	-1175	-1045	319	5750	9549	-521	-509	-403
43.175	-1361	1296	4462	-1361	-1172	-1036	322	5808	9633	-514	-504	-395
43.1833	-1352	1321	4510	-1352	-1169	-1029	322	5869	9723	-510	-499	-393
43.1917	-1344	1348	4559	-1344	-1173	-1030	323	5930	9813	-506	-494	-390
43.2	-1338	1380	4609	-1338	-1178	-1031	331	5991	9897	-506	-492	-383
43.2083	-1334	1412	4658	-1334	-1185	-1028	338	6055	9977	-515	-486	-374
43.2167	-1340	1436	4708	-1340	-1185	-1025	342	6112	10059	-516	-471	-368
43.225	-1345	1460	4753	-1345	-1176	-1025	343	6172	10140	-513	-461	-367
43.2333	-1348	1491	4798	-1348	-1171	-1019	347	6240	10222	-510	-460	-365
43.2417	-1347	1522	4851	-1347	-1168	-1004	354	6308	10305	-501	-458	-355
43.25	-1343	1554	4905	-1343	-1163	-989	366	6372	10385	-497	-448	-358
43.2583	-1342	1584	4951	-1342	-1160	-978	375	6429	10460	-496	-443	-364
43.2667	-1345	1616	5000	-1345	-1160	-976	384	6480	10542	-499	-445	-364
43.275	-1350	1650	5051	-1350	-1156	-977	389	6538	10624	-500	-458	-360
43.2833	-1350	1685	5099	-1350	-1151	-977	393	6601	10707	-497	-467	-355
43.2917	-1356	1717	5153	-1356	-1151	-975	398	6664	10785	-493	-471	-351
43.3	-1363	1745	5202	-1363	-1154	-976	406	6730	10868	-492	-475	-353
43.3083	-1366	1777	5242	-1366	-1149	-971	410	6794	10956	-481	-478	-348
43.3167	-1367	1810	5283	-1367	-1144	-966	412	6859	11043	-474	-484	-347
43.325	-1361	1842	5328	-1361	-1143	-964	412	6926	11126	-470	-481	-349
43.3333	-1358	1869	5379	-1358	-1144	-963	416	6994	11213	-462	-476	-346
43.3417	-1356	1892	5432	-1356	-1151	-957	426	7059	11301	-456	-470	-340
43.35	-1353	1924	5485	-1353	-1151	-949	438	7122	11386	-452	-463	-335
43.3583	-1353	1959	5538	-1353	-1141	-944	449	7192	11464	-451	-454	-335
43.3667	-1358	1993	5593	-1358	-1135	-941	455	7255	11544	-458	-451	-332
43.375	-1363	2024	5650	-1363	-1131	-933	461	7321	11631	-461	-449	-324
43.3833	-1368	2059	5708	-1368	-1126	-928	467	7387	11714	-463	-453	-324
43.3917	-1365	2094	5765	-1365	-1118	-925	474	7452	11798	-460	-458	-325
43.4	-1363	2125	5822	-1363	-1119	-923	475	7520	11881	-457	-461	-323
43.4083	-1362	2156	5873	-1362	-1120	-920	478	7585	11966	-456	-463	-318
43.4167	-1360	2188	5924	-1360	-1117	-915	487	7652	12052	-455	-459	-320
43.425	-1356	2216	5979	-1356	-1115	-904	502	7721	12137	-450	-449	-322
43.4333	-1360	2248	6038	-1360	-1111	-898	515	7791	12225	-437	-441	-317
43.4417	-1364	2288	6096	-1364	-1102	-895	523	7857	12316	-427	-437	-313
43.45	-1373	2329	6147	-1373	-1098	-891	530	7923	12407	-419	-436	-303
43.4583	-1378	2362	6199	-1378	-1096	-883	537	7995	12494	-412	-431	-302
43.4667	-1373	2390	6254	-1373	-1097	-874	545	8074	12580	-405	-425	-303
43.475	-1366	2422	6308	-1366	-1093	-869	555	8143	12664	-393	-425	-300
43.4833	-1362	2454	6361	-1362	-1090	-862	563	8207	12750	-384	-427	-295
43.4917	-1358	2480	6413	-1358	-1082	-856	568	8277	12839	-379	-423	-290
43.5	-1357	2520	6474	-1357	-1081	-852	569	8347	12923	-375	-419	-288
43.5083	-1360	2564	6534	-1360	-1086	-846	579	8415	13009	-368	-416	-284
43.5167	-1366	2601	6591	-1366	-1090	-846	589	8488	13093	-371	-409	-275
43.525	-1366	2637	6647	-1366	-1092	-844	598	8564	13180	-376	-406	-266
43.5333	-1366	2673	6703	-1366	-1094	-840	603	8631	13267	-375	-404	-265
43.5417	-1366	2710	6757	-1366	-1088	-831	610	8702	13357	-369	-403	-269
43.55	-1370	2747	6808	-1370	-1082	-827	620	8778	13452	-369	-410	-269
43.5583	-1377	2779	6863	-1377	-1075	-827	626	8853	13545	-371	-409	-269
43.5667	-1376	2816	6922	-1376	-1069	-820	632	8923	13639	-374	-407	-265
43.575	-1374	2858	6969	-1374	-1059	-806	645	8990	13728	-378	-407	-267
43.5833	-1369	2904	7025	-1369	-1049	-794	658	9059	13817	-376	-408	-261
43.5917	-1361	2947	7088	-1361	-1044	-788	666	9132	13906	-373	-406	-254
43.6	-1352	2993	7151	-1352	-1041	-782	679	9205	13993	-370	-401	-251
43.6083	-1348	3038	7215	-1348	-1036	-772	689	9278	14081	-365	-395	-243
43.6167	-1349	3070	7278	-1349	-1025	-760	697	9347	14173	-360	-387	-231
43.625	-1350	3100	7339	-1350	-1017	-753	707	9411	14265	-355	-377	-224
43.6333	-1352	3137	7394	-1352	-1011	-752	718	9478	14353	-354	-368	-224
43.6417	-1353	3174	7454	-1353	-1006	-746	726	9555	14440	-351	-361	-221
43.65	-1352	3203	7513	-1352	-999	-739	734	9637	14529	-344	-349	-214
43.6583	-1352	3236	7564	-1352	-995	-737	739	9716	14616	-336	-342	-214
43.6667	-1351	3277	7619	-1351	-995	-736	749	9787	14707	-325	-332	-212
43.675	-1350	3321	7682	-1350	-994	-728	760	9860	14796	-316	-320	-210
43.6833	-1349	3368	7744	-1349	-991	-719	770	9931	14884	-310	-317	-207
43.6917	-1352	3413	7808	-1352	-985	-705	784	10009	14977	-308	-318	-202
43.7	-1354	3454	7868	-1354	-979	-691	800	10089	15073	-300	-322	-192
43.7083	-1352	3495	7924	-1352	-977	-685	814	10168	15169	-290	-313	-183
43.7167	-1350	3530	7983	-1350	-972	-673	820	10246	15262	-281	-311	-179
43.725	-1344	3568	8036	-1344	-968	-661	829	10317	15354	-271	-310	-178
43.7333	-1340	3618	8094	-1340	-960	-656	841	10384	15444	-270	-298	-169
43.7417	-1348	3662	8146	-1348	-950	-650	853	10454	15532	-265	-279	-161
43.75	-1354	3703	8200	-1354	-941	-650	867	10534	15621	-257	-265	-159
43.7583	-1351	3747	8263	-1351	-938	-648	878	10613	15712	-244	-262	-153
43.7667	-1350	3788	8330	-1350	-932	-638	891	10691	15799	-240	-264	-151
43.775	-1348	3821	8391	-1348	-921	-623	900	10774	15893	-238	-265	-143
43.7833	-1341	3862	8448	-1341	-916	-610	907	10852	15986	-231	-270	-127
43.7917	-1337	3906	8512	-1337	-913	-607	918	10923	16081	-228	-267	-108
43.8	-1332	3950	8574	-1332	-913	-600	937	10996	16176	-223	-259	-101
43.8083	-1332	3994	8630	-1332	-913	-588	953	11070	16266	-212	-250	-101
43.8167	-1338	4033	8686	-1338	-912	-580	963	11142	16353	-208	-234	-96
43.825	-1343	4069	8750	-1343	-904	-567	975	11223	16444	-212	-221	-91
43.8333	-1343	4107	8812	-1343	-889	-551	985	11305	16533	-205	-212	-78
43.8417	-1340	4148	8870	-1340	-880	-537	998	11383	16624	-193	-209	-64
43.85	-1344	4191	8925	-1344	-880	-527	1009	11461	16717	-185	-207	-49
43.8583	-1348	4241	8988	-1348	-872	-521	1021	11537	16812	-171	-206	-39
43.8667	-1347	4287	9047	-1347	-866	-513	1034	11611	16905	-160	-205	-35
43.875	-1337	4329	9108	-1337	-861	-500	1047	11689	16992	-152	-196	-34
43.8833	-1332	4375	9166	-1332	-859	-486	1058	11762	17083	-135	-188	-40
43.8917	-1331	4419	9225	-1331	-851	-475	1068	11834	17175	-118	-180	-35
43.9	-1325	4461	9292	-1325	-844	-471	1079	11908	17263	-108	-171	-23
43.9083	-1319	4505	9357	-1319	-838	-465	1088	11982	17347	-104	-165	-24
43.9167	-1323	4550	9420	-1323	-831	-455	1097	12061	17432	-103	-160	-21
43.925	-1330	4589	9484	-1330	-825	-446	1112	12145	17516	-100	-149	-7
43.9333	-1339	4636	9547	-1339	-818	-442	1132	12227	17607	-93	-141	1
43.9417	-1344	4686	9601	-1344	-806	-434	1146	12304	17706	-83	-136	16
43.95	-1338	4736	9662	-1338	-797	-416	1159	12384	17808	-75	-137	36
43.9583	-1330	4785	9724	-1330	-789	-401	1172	12465	17909	-69	-129	46
43.9667	-1332	4835	9785	-1332	-781	-389	1185	12551	18000	-59	-118	55
43.975	-1332	4875	9850	-1332	-775	-375	1201	12636	18087	-50	-110	65
43.9833	-1331	4915	9913	-1331	-770	-365	1215	12715	18178	-33	-109	75
43.9917	-1334	4962	9976	-1334	-763	-355	1229	12792	18267	-13	-110	83
44	-1336	5005	10034	-1336	-757	-342	1249	12870	18359	3	-103	90
44.0083	-1331	5051	10100	-1331	-749	-327	1268	12949	18450	22	-92	100
44.0167	-1326	5100	10165	-1326	-740	-314	1285	13027	18537	33	-84	112
44.025	-1326	5151	10230	-1326	-730	-300	1301	13100	18622	42	-73	122
44.0333	-1321	5205	10289	-1321	-720	-287	1315	13174	18715	59	-60	135
44.0417	-1313	5253	10350	-1313	-713	-272	1327	13251	18808	78	-48	134
44.05	-1307	5297	10409	-1307	-701	-258	1339	13335	18897	90	-40	134
44.0583	-1302	5339	10468	-1302	-684	-246	1354	13420	18983	106	-35	141
44.0667	-1300	5384	10532	-1300	-670	-236	1371	13502	19069	124	-23	150
44.075	-1301	5435	10590	-1301	-658	-213	1389	13583	19159	128	-16	164
44.0833	-1301	5489	10652	-1301	-656	-193	1409	13662	19253	131	-3	176
44.0917	-1301	5536	10716	-1301	-653	-177	1426	13740	19349	138	10	187
44.1	-1300	5587	10784	-1300	-654	-161	1437	13816	19442	148	18	202
44.1083	-1300	5636	10852	-1300	-651	-148	1445	13895	19537	166	32	210
44.1167	-1300	5680	10915	-1300	-642	-141	1455	13978	19631	186	47	217
44.125	-1305	5722	10977	-1305	-630	-134	1470	14058	19723	202	52	231
44.1333	-1307	5766	11040	-1307	-619	-121	1489	14138	19815	209	59	250
44.1417	-1305	5816	11101	-1305	-609	-108	1509	14217	19907	210	71	269
44.15	-1301	5866	11159	-1301	-597	-98	1526	14292	20004	209	91	288
44.1583	-1299	5919	11219	-1299	-581	-83	1542	14366	20096	212	109	302
44.1667	-1296	5970	11282	-1296	-567	-63	1561	14439	20179	222	121	310
44.175	-1295	6019	11347	-1295	-555	-45	1579	14517	20262	236	137	319
44.1833	-1294	6064	11409	-1294	-545	-30	1592	14598	20349	250	153	325
44.1917	-1296	6110	11473	-1296	-530	-15	1604	14681	20433	275	169	332
44.2	-1295	6159	11540	-1295	-523	4	1618	14769	20520	292	179	349
44.2083	-1291	6207	11604	-1291	-515	21	1632	14852	20608	300	183	370
44.2167	-1295	6251	11662	-1295	-505	37	1650	14930	20695	312	186	387
44.225	-1301	6303	11721	-1301	-493	52	1665	15008	20788	329	197	398
44.2333	-1298	6353	11786	-1298	-487	67	1683	15088	20878	346	212	407
44.2417	-1290	6404	11856	-1290	-479	83	1702	15164	20967	365	232	422
44.25	-1285	6457	11923	-1285	-467	102	1726	15246	21056	384	257	436
44.2583	-1282	6507	11981	-1282	-454	126	1747	15331	21145	400	276	456
44.2667	-1286	6552	12046	-1286	-442	145	1762	15411	21236	419	286	475
44.275	-1283	6599	12112	-1283	-428	161	1772	15488	21326	433	296	486
44.2833	-1276	6642	12167	-1276	-414	183	1792	15564	21413	448	305	501
44.2917	-1272	6691	12220	-1272	-401	206	1814	15648	21500	468	317	512
44.3	-1272	6745	12276	-1272	-390	219	1829	15730	21586	491	333	523
44.3083	-1265	6796	12338	-1265	-382	234	1845	15807	21672	509	355	535
44.3167	-1258	6851	12404	-1258	-375	252	1863	15886	21763	524	376	551
44.325	-1255	6905	12472	-1255	-365	271	1877	15968	21852	535	397	567
44.3333	-1251	6957	12543	-1251	-350	291	1890	16052	21938	545	413	579
44.3417	-1242	7007	12609	-1242	-335	312	1907	16134	22023	562	431	595
44.35	-1235	7055	12672	-1235	-316	337	1929	16212	22112	581	447	610
44.3583	-1232	7093	12740	-1232	-306	356	1949	16287	22201	609	464	630
44.3667	-1230	7141	12805	-1230	-298	369	1969	16364	22288	631	475	659
44.375	-1232	7193	12866	-1232	-285	387	1990	16441	22379	645	487	688
44.3833	-1236	7249	12921	-1236	-275	410	2006	16520	22470	659	496	708
44.3917	-1233	7310	12983	-1233	-264	429	2020	16599	22558	676	511	729
44.4	-1230	7369	13044	-1230	-250	449	2040	16679	22647	694	518	749
44.4083	-1222	7423	13108	-1222	-234	467	2061	16757	22735	714	525	774
44.4167	-1214	7474	13170	-1214	-222	486	2082	16836	22819	732	538	792
44.425	-1212	7526	13227	-1212	-209	509	2109	16916	22900	745	557	806
44.4333	-1216	7581	13279	-1216	-190	535	2129	16995	22979	763	583	820
44.4417	-1217	7638	13339	-1217	-177	559	2149	17077	23061	785	609	838
44.45	-1213	7697	13399	-1213	-162	578	2166	17159	23148	811	635	857
44.4583	-1209	7749	13456	-1209	-150	598	2183	17238	23234	831	669	875
44.4667	-1203	7801	13517	-1203	-135	624	2200	17322	23321	851	690	892
44.475	-1194	7854	13587	-1194	-123	644	2220	17405	23406	876	705	919
44.4833	-1184	7904	13654	-1184	-110	663	2240	17487	23494	909	718	946
44.4917	-1175	7949	13721	-1175	-95	687	2259	17565	23575	938	726	966
44.5	-1169	7998	13789	-1169	-78	712	2277	17642	23655	956	736	985
44.5083	-1166	8042	13850	-1166	-62	736	2298	17716	23742	978	748	1008
44.5167	-1160	8085	13911	-1160	-40	754	2322	17791	23831	996	768	1027
44.525	-1153	8131	13971	-1153	-21	773	2344	17864	23921	1020	786	1040
44.5333	-1152	8185	14037	-1152	-4	796	2365	17938	24009	1048	804	1060
44.5417	-1158	8242	14099	-1158	16	820	2383	18023	24095	1074	820	1085
44.55	-1162	8300	14157	-1162	32	842	2400	18109	24178	1093	837	1113
44.5583	-1157	8354	14213	-1157	44	860	2420	18190	24261	1107	854	1141
44.5667	-1149	8410	14271	-1149	60	880	2436	18264	24338	1130	879	1168
44.575	-1141	8465	14327	-1141	78	915	2453	18337	24411	1154	907	1195
44.5833	-1138	8517	14387	-1138	96	947	2473	18410	24486	1176	937	1222
44.5917	-1137	8567	14444	-1137	111	976	2494	18486	24566	1200	959	1245
44.6	-1129	8615	14506	-1129	129	1004	2519	18563	24649	1228	971	1267
44.6083	-1119	8663	14574	-1119	146	1025	2541	18642	24732	1253	989	1286
44.6167	-1110	8710	14637	-1110	163	1051	2556	18718	24817	1280	1012	1305
44.625	-1104	8762	14697	-1104	181	1075	2576	18797	24898	1296	1033	1333
44.6333	-1093	8814	14756	-1093	199	1101	2601	18876	24982	1317	1053	1361
44.6417	-1083	8871	14813	-1083	219	1125	2626	18952	25069	1353	1077	1385
44.65	-1079	8930	14873	-1079	238	1152	2652	19030	25156	1385	1106	1409
44.6583	-1074	8990	14934	-1074	261	1175	2675	19105	25236	1408	1131	1430
44.6667	-1072	9048	14988	-1072	278	1200	2698	19173	25311	1430	1156	1462
44.675	-1071	9098	15044	-1071	294	1226	2719	19242	25390	1450	1178	1496
44.6833	-1066	9146	15106	-1066	311	1248	2739	19319	25474	1473	1210	1529
44.6917	-1069	9197	15168	-1069	332	1285	2761	19400	25557	1494	1246	1559
44.7	-1061	9251	15226	-1061	350	1324	2786	19478	25639	1517	1277	1582
44.7083	-1049	9305	15287	-1049	369	1353	2813	19557	25720	1538	1296	1602
44.7167	-1040	9355	15346	-1040	388	1379	2837	19636	25798	1566	1323	1623
44.725	-1036	9401	15405	-1036	412	1407	2858	19711	25875	1600	1356	1649
44.7333	-1032	9452	15456	-1032	433	1439	2883	19785	25954	1632	1388	1678
44.7417	-1026	9507	15510	-1026	452	1473	2909	19857	26031	1658	1411	1707
44.75	-1018	9561	15566	-1018	474	1503	2928	19932	26114	1688	1435	1736
44.7583	-1007	9612	15626	-1007	495	1536	2946	20010	26201	1724	1457	1771
44.7667	-993	9671	15686	-993	521	1566	2966	20092	26282	1760	1479	1803
44.775	-984	9724	15741	-984	542	1589	2984	20169	26354	1790	1514	1833
44.7833	-980	9772	15798	-980	559	1614	3006	20243	26423	1817	1543	1866
44.7917	-975	9828	15859	-975	579	1638	3029	20318	26495	1847	1571	1901
44.8	-965	9885	15922	-965	599	1665	3050	20392	26571	1871	1603	1946
44.8083	-960	9943	15985	-960	618	1695	3072	20469	26650	1899	1628	1978
44.8167	-956	9997	16050	-956	641	1724	3097	20541	26730	1930	1652	2005
44.825	-950	10058	16114	-950	664	1752	3118	20610	26811	1959	1687	2032
44.8333	-944	10117	16175	-944	684	1781	3142	20681	26891	1987	1719	2057
44.8417	-936	10168	16236	-936	707	1811	3166	20757	26968	2019	1746	2085
44.85	-927	10218	16293	-927	730	1840	3188	20831	27048	2053	1771	2106
44.8583	-915	10269	16348	-915	750	1871	3209	20899	27127	2091	1805	2132
44.8667	-905	10321	16407	-905	768	1906	3229	20966	27208	2127	1845	2161
44.875	-895	10377	16463	-895	790	1946	3247	21035	27286	2151	1876	2191
44.8833	-880	10435	16516	-880	813	1979	3271	21109	27360	2181	1904	2225
44.8917	-867	10492	16574	-867	830	2003	3300	21180	27433	2205	1928	2255
44.9	-855	10543	16628	-855	853	2031	3323	21253	27505	2237	1955	2278
44.9083	-850	10595	16683	-850	882	2068	3344	21333	27584	2274	1985	2309
44.9167	-845	10647	16744	-845	909	2102	3368	21408	27659	2312	2011	2343
44.925	-839	10702	16807	-839	933	2133	3395	21479	27733	2348	2034	2386
44.9333	-831	10757	16864	-831	955	2162	3420	21549	27805	2382	2072	2431
44.9417	-825	10806	16918	-825	983	2196	3444	21617	27881	2411	2114	2466
44.95	-815	10858	16972	-815	1008	2233	3469	21687	27951	2440	2151	2498
44.9583	-805	10910	17030	-805	1027	2272	3487	21763	28023	2479	2176	2527
44.9667	-793	10959	17090	-793	1045	2303	3511	21842	28093	2510	2200	2552
44.975	-780	11013	17149	-780	1073	2328	3537	21916	28165	2536	2223	2580
44.9833	-761	11076	17205	-761	1101	2361	3566	21978	28240	2564	2252	2616
44.9917	-747	11132	17259	-747	1130	2402	3591	22041	28315	2600	2287	2653
45	-741	11186	17319	-741	1153	2441	3612	22113	28387	2642	2323	2696
45.0083	-737	11238	17371	-737	1168	2477	3634	22191	28459	2688	2354	2738
45.0167	-737	11296	17427	-737	1193	2520	3661	22266	28528	2735	2386	2776
45.025	-729	11355	17483	-729	1223	2561	3689	22342	28600	2774	2419	2817
45.0333	-715	11402	17535	-715	1249	2598	3714	22419	28675	2816	2458	2860
45.0417	-699	11453	17593	-699	1274	2636	3737	22486	28749	2853	2492	2901
45.05	-679	11508	17650	-679	1291	2673	3759	22553	28822	2884	2520	2937
45.0583	-667	11567	17700	-667	1316	2709	3784	22620	28891	2924	2555	2968
45.0667	-662	11624	17747	-662	1346	2749	3812	22694	28960	2972	2595	3007
45.075	-654	11679	17795	-654	1381	2790	3836	22767	29032	3015	2633	3046
45.0833	-642	11734	17851	-642	1416	2824	3858	22836	29109	3063	2671	3087
45.0917	-627	11789	17908	-627	1445	2858	3880	22903	29183	3113	2710	3129
45.1	-609	11844	17961	-609	1473	2893	3902	22973	29255	3156	2753	3169
45.1083	-585	11891	18016	-585	1505	2934	3923	23043	29326	3199	2803	3206
45.1167	-566	11944	18074	-566	1534	2976	3947	23114	29397	3240	2850	3243
45.125	-549	12006	18133	-549	1561	3017	3976	23188	29473	3284	2881	3283
45.1333	-541	12066	18193	-541	1590	3055	4003	23260	29544	3328	2917	3317
45.1417	-534	12120	18252	-534	1617	3094	4027	23326	29611	3378	2956	3361
45.15	-531	12172	18309	-531	1640	3130	4054	23394	29675	3425	2986	3413
45.1583	-519	12225	18365	-519	1663	3165	4074	23465	29743	3463	3016	3461
45.1667	-502	12282	18416	-502	1693	3200	4094	23532	29817	3501	3059	3510
45.175	-485	12340	18476	-485	1720	3238	4122	23600	29886	3540	3098	3555
45.1833	-472	12395	18530	-472	1749	3280	4150	23671	29958	3588	3132	3600
45.1917	-459	12449	18580	-459	1783	3322	4178	23743	30030	3645	3169	3646
45.2	-443	12504	18634	-443	1817	3368	4204	23809	30095	3698	3210	3685
45.2083	-427	12560	18687	-427	1849	3408	4226	23877	30163	3747	3257	3720
45.2167	-414	12618	18743	-414	1876	3445	4250	23945	30232	3800	3299	3760
45.225	-398	12676	18799	-398	1903	3486	4277	24011	30301	3846	3334	3801
45.2333	-382	12737	18850	-382	1936	3531	4303	24080	30369	3888	3367	3846
45.2417	-364	12796	18906	-364	1970	3576	4326	24149	30437	3923	3396	3896
45.25	-347	12845	18963	-347	2001	3615	4353	24215	30506	3957	3439	3947
45.2583	-332	12893	19019	-332	2033	3655	4381	24278	30573	3998	3490	4000
45.2667	-313	12949	19077	-313	2066	3695	4408	24347	30639	4035	3542	4054
45.275	-292	13003	19130	-292	2095	3737	4435	24417	30708	4073	3587	4104
45.2833	-278	13060	19181	-278	2122	3792	4460	24486	30777	4118	3628	4150
45.2917	-264	13119	19232	-264	2155	3842	4489	24554	30850	4165	3666	4191
45.3	-253	13176	19286	-253	2187	3884	4517	24625	30923	4217	3713	4237
45.3083	-244	13226	19339	-244	2216	3925	4540	24698	30992	4272	3749	4289
45.3167	-233	13271	19390	-233	2248	3965	4563	24763	31056	4327	3788	4338
45.325	-217	13326	19443	-217	2286	4001	4591	24824	31116	4376	3835	4387
45.3333	-201	13389	19498	-201	2319	4037	4620	24886	31181	4421	3885	4436
45.3417	-184	13445	19553	-184	2352	4077	4644	24945	31252	4470	3936	4486
45.35	-166	13497	19611	-166	2387	4118	4666	25015	31320	4511	3987	4530
45.3583	-150	13546	19668	-150	2424	4165	4688	25086	31386	4547	4036	4573
45.3667	-135	13603	19724	-135	2456	4214	4718	25154	31450	4584	4084	4627
45.375	-118	13661	19780	-118	2485	4267	4744	25219	31516	4629	4131	4680
45.3833	-99	13714	19829	-99	2513	4313	4768	25284	31585	4678	4180	4725
45.3917	-89	13768	19879	-89	2545	4359	4795	25353	31655	4736	4226	4772
45.4	-78	13823	19936	-78	2581	4411	4822	25420	31723	4798	4265	4826
45.4083	-63	13875	19988	-63	2618	4454	4849	25490	31786	4856	4308	4885
45.4167	-43	13934	20035	-43	2653	4500	4878	25554	31853	4914	4352	4938
45.425	-19	13996	20086	-19	2688	4548	4907	25615	31920	4970	4395	4987
45.4333	3	14051	20138	3	2728	4593	4938	25675	31987	5021	4436	5039
45.4417	24	14105	20192	24	2763	4639	4964	25735	32050	5070	4482	5094
45.45	46	14160	20248	46	2801	4681	4989	25799	32113	5113	4535	5145
45.4583	65	14209	20302	65	2835	4724	5016	25869	32186	5154	4584	5193
45.4667	86	14262	20359	86	2871	4774	5039	25933	32254	5198	4633	5246
45.475	105	14320	20411	105	2910	4820	5067	25992	32315	5242	4687	5301
45.4833	126	14374	20459	126	2948	4866	5096	26056	32382	5296	4735	5353
45.4917	144	14429	20507	144	2984	4916	5126	26123	32445	5357	4783	5407
45.5	165	14486	20553	165	3016	4966	5156	26194	32504	5417	4834	5467
45.5083	186	14541	20600	186	3049	5017	5182	26266	32566	5474	4882	5527
45.5167	209	14592	20651	209	3084	5063	5207	26332	32636	5529	4928	5588
45.525	233	14649	20702	233	3126	5112	5231	26394	32705	5577	4982	5647
45.5333	258	14705	20752	258	3163	5162	5259	26462	32773	5625	5040	5701
45.5417	276	14761	20806	276	3194	5209	5296	26529	32840	5679	5091	5753
45.55	295	14817	20861	295	3234	5255	5325	26589	32902	5738	5134	5807
45.5583	315	14875	20916	315	3276	5300	5349	26653	32968	5794	5179	5868
45.5667	336	14936	20968	336	3316	5347	5377	26718	33037	5844	5229	5928
45.575	363	14991	21016	363	3357	5394	5410	26782	33102	5902	5279	5992
45.5833	391	15039	21066	391	3394	5444	5441	26847	33167	5961	5335	6055
45.5917	417	15082	21119	417	3438	5496	5467	26908	33229	6018	5391	6113
45.6	435	15133	21176	435	3486	5551	5489	26970	33284	6072	5450	6168
45.6083	460	15189	21230	460	3528	5608	5514	27030	33341	6128	5509	6227
45.6167	488	15250	21277	488	3566	5662	5540	27090	33407	6191	5562	6284
45.625	513	15312	21324	513	3608	5715	5563	27152	33473	6251	5617	6345
45.6333	539	15366	21377	539	3646	5764	5585	27217	33536	6301	5669	6404
45.6417	561	15419	21427	561	3691	5818	5615	27279	33600	6357	5717	6453
45.65	579	15472	21478	579	3737	5874	5648	27345	33668	6418	5773	6509
45.6583	596	15523	21531	596	3770	5928	5685	27407	33735	6483	5829	6579
45.6667	616	15575	21585	616	3807	5985	5717	27468	33801	6543	5883	6641
45.675	641	15632	21633	641	3847	6042	5743	27531	33866	6596	5934	6691
45.6833	665	15680	21688	665	3886	6096	5769	27597	33927	6651	5997	6753
45.6917	693	15730	21737	693	3928	6145	5796	27661	33987	6707	6060	6824
45.7	715	15783	21784	715	3969	6191	5824	27725	34049	6768	6119	6886
45.7083	739	15840	21835	739	4012	6241	5853	27788	34109	6825	6172	6946
45.7167	762	15895	21890	762	4053	6292	5882	27850	34172	6892	6230	7009
45.725	789	15946	21946	789	4093	6348	5903	27913	34231	6959	6288	7070
45.7333	819	15993	22003	819	4130	6409	5925	27976	34292	7028	6344	7123
45.7417	852	16045	22059	852	4172	6459	5952	28036	34352	7103	6409	7180
45.75	884	16099	22107	884	4217	6508	5986	28096	34419	7175	6480	7246
45.7583	912	16155	22152	912	4264	6565	6020	28162	34485	7239	6544	7318
45.7667	940	16208	22197	940	4317	6621	6050	28226	34543	7297	6605	7386
45.775	965	16263	22243	965	4366	6676	6081	28287	34607	7353	6663	7447
45.7833	988	16318	22303	988	4408	6732	6112	28348	34671	7411	6719	7505
45.7917	1007	16365	22361	1007	4448	6787	6137	28410	34734	7475	6778	7579
45.8	1032	16414	22407	1032	4492	6844	6162	28475	34798	7541	6838	7655
45.8083	1059	16467	22453	1059	4538	6904	6191	28537	34863	7604	6897	7724
45.8167	1084	16522	22503	1084	4588	6963	6222	28599	34926	7671	6955	7794
45.825	1107	16578	22562	1107	4633	7017	6253	28664	34990	7735	7012	7863
45.8333	1132	16636	22621	1132	4675	7069	6284	28726	35055	7802	7062	7927
45.8417	1163	16693	22677	1163	4718	7123	6310	28789	35118	7867	7119	7993
45.85	1195	16751	22728	1195	4769	7177	6332	28858	35185	7930	7183	8057
45.8583	1223	16808	22774	1223	4821	7229	6357	28921	35250	7991	7254	8126
45.8667	1251	16860	22823	1251	4867	7290	6389	28985	35316	8061	7316	8195
45.875	1286	16915	22867	1286	4908	7357	6421	29048	35386	8130	7370	8268
45.8833	1316	16975	22906	1316	4953	7421	6453	29109	35452	8196	7425	8338
45.8917	1351	17030	22952	1351	4997	7476	6484	29167	35516	8267	7478	8406
45.9	1385	17088	23008	1385	5037	7533	6514	29230	35575	8339	7542	8478
45.9083	1414	17148	23057	1414	5083	7592	6543	29290	35633	8407	7609	8543
45.9167	1439	17201	23104	1439	5134	7651	6579	29344	35694	8477	7683	8613
45.925	1466	17253	23158	1466	5183	7712	6613	29394	35759	8544	7750	8683
45.9333	1492	17305	23213	1492	5234	7770	6643	29455	35820	8616	7818	8748
45.9417	1518	17361	23267	1518	5279	7826	6674	29520	35882	8690	7887	8820
45.95	1546	17416	23315	1546	5323	7875	6707	29581	35940	8761	7949	8895
45.9583	1580	17466	23362	1580	5372	7929	6738	29641	36000	8825	8012	8968
45.9667	1616	17517	23411	1616	5411	7988	6768	29705	36058	8890	8076	9041
45.975	1651	17573	23462	1651	5457	8048	6796	29776	36116	8962	8140	9110
45.9833	1685	17626	23516	1685	5509	8107	6828	29842	36175	9031	8205	9178
45.9917	1717	17680	23564	1717	5555	8168	6861	29903	36240	9095	8270	9249
46	1750	17734	23610	1750	5604	8234	6896	29964	36306	9163	8334	9321
46.0083	1780	17787	23652	1780	5659	8296	6927	30021	36367	9231	8406	9396
46.0167	1806	17841	23704	1806	5713	8355	6959	30079	36427	9310	8476	9466
46.025	1832	17894	23765	1832	5770	8420	6982	30142	36494	9392	8542	9535
46.0333	1866	17948	23819	1866	5820	8476	7007	30207	36562	9460	8614	9603
46.0417	1900	17999	23868	1900	5865	8533	7034	30268	36626	9525	8688	9676
46.05	1931	18051	23912	1931	5909	8593	7057	30329	36692	9603	8763	9749
46.0583	1961	18102	23954	1961	5960	8655	7085	30391	36753	9677	8839	9824
46.0667	2000	18154	24004	2000	6015	8712	7120	30456	36811	9749	8913	9894
46.075	2047	18205	24059	2047	6064	8768	7158	30519	36872	9817	8978	9967
46.0833	2087	18253	24113	2087	6112	8827	7191	30581	36933	9894	9047	10041
46.0917	2126	18303	24166	2126	6158	8891	7220	30637	36989	9963	9117	10117
46.1	2154	18355	24219	2154	6201	8961	7247	30695	37050	10031	9183	10201
46.1083	2175	18413	24272	2175	6248	9023	7275	30752	37115	10108	9244	10285
46.1167	2199	18477	24323	2199	6302	9077	7305	30812	37186	10178	9305	10369
46.125	2233	18534	24372	2233	6364	9136	7336	30872	37250	10251	9371	10448
46.1333	2269	18584	24424	2269	6427	9206	7369	30929	37312	10332	9446	10516
46.1417	2311	18635	24472	2311	6485	9278	7397	30987	37376	10409	9517	10581
46.15	2351	18693	24521	2351	6541	9345	7429	31050	37434	10490	9600	10657
46.1583	2389	18751	24566	2389	6597	9405	7463	31115	37491	10577	9678	10737
46.1667	2431	18810	24609	2431	6645	9467	7496	31180	37546	10665	9749	10816
46.175	2472	18863	24655	2472	6691	9527	7530	31246	37601	10745	9826	10895
46.1833	2505	18913	24704	2505	6745	9588	7561	31309	37664	10823	9901	10976
46.1917	2531	18963	24754	2531	6797	9649	7588	31369	37725	10899	9969	11057
46.2	2562	19014	24809	2562	6850	9709	7620	31428	37784	10974	10040	11138
46.2083	2591	19066	24862	2591	6904	9770	7652	31487	37850	11052	10113	11215
46.2167	2624	19122	24916	2624	6958	9835	7683	31551	37913	11128	10186	11296
46.225	2669	19175	24968	2669	7014	9901	7716	31609	37977	11209	10256	11382
46.2333	2718	19223	25022	2718	7071	9961	7746	31669	38039	11292	10332	11470
46.2417	2763	19268	25069	2763	7121	10026	7770	31729	38103	11380	10414	11555
46.25	2804	19320	25113	2804	7178	10099	7802	31795	38161	11471	10494	11629
46.2583	2840	19372	25164	2840	7237	10166	7840	31857	38221	11558	10571	11703
46.2667	2876	19429	25218	2876	7291	10231	7877	31916	38278	11638	10644	11780
46.275	2911	19483	25269	2911	7344	10300	7907	31977	38331	11715	10724	11859
46.2833	2951	19537	25325	2951	7400	10367	7939	32033	38384	11795	10804	11940
46.2917	2992	19592	25378	2992	7459	10430	7970	32088	38441	11878	10883	12024
46.3	3031	19647	25422	3031	7517	10491	8006	32145	38502	11959	10958	12110
46.3083	3067	19697	25465	3067	7574	10553	8039	32205	38564	12041	11035	12198
46.3167	3104	19750	25510	3104	7630	10618	8068	32265	38632	12129	11108	12282
46.325	3138	19802	25560	3138	7681	10681	8103	32324	38703	12217	11179	12373
46.3333	3178	19852	25617	3178	7738	10746	8136	32388	38767	12300	11253	12467
46.3417	3223	19901	25672	3223	7795	10811	8172	32447	38831	12387	11331	12549
46.35	3271	19953	25715	3271	7852	10874	8202	32506	38894	12466	11412	12627
46.3583	3314	20004	25764	3314	7911	10936	8231	32565	38957	12549	11492	12706
46.3667	3348	20055	25820	3348	7974	11001	8265	32623	39020	12637	11571	12785
46.375	3386	20107	25869	3386	8037	11071	8298	32680	39078	12725	11650	12858
46.3833	3430	20161	25916	3430	8095	11138	8331	32745	39133	12815	11731	12937
46.3917	3473	20217	25969	3473	8140	11203	8364	32806	39187	12904	11810	13022
46.4	3510	20275	26026	3510	8191	11275	8394	32859	39244	12987	11887	13102
46.4083	3547	20329	26075	3547	8253	11345	8423	32919	39303	13069	11967	13183
46.4167	3583	20375	26120	3583	8313	11411	8458	32986	39365	13153	12049	13267
46.425	3619	20426	26166	3619	8378	11478	8496	33052	39427	13241	12130	13351
46.4333	3657	20481	26211	3657	8444	11545	8534	33112	39485	13330	12209	13436
46.4417	3701	20532	26261	3701	8500	11606	8569	33169	39538	13420	12287	13526
46.45	3749	20584	26312	3749	8552	11672	8604	33226	39597	13503	12367	13620
46.4583	3799	20630	26363	3799	8616	11733	8637	33283	39659	13582	12451	13717
46.4667	3848	20677	26410	3848	8681	11793	8664	33345	39721	13666	12526	13807
46.475	3889	20723	26463	3889	8737	11859	8694	33409	39782	13755	12603	13891
46.4833	3928	20776	26513	3928	8787	11930	8722	33472	39844	13842	12684	13970
46.4917	3968	20827	26565	3968	8840	11998	8752	33533	39905	13925	12766	14053
46.5	4011	20881	26619	4011	8898	12072	8787	33591	39968	14009	12844	14137
46.5083	4052	20940	26675	4052	8958	12143	8820	33648	40030	14095	12920	14225
46.5167	4093	20991	26728	4093	9021	12208	8857	33701	40089	14179	12999	14315
46.525	4141	21039	26776	4141	9081	12274	8886	33755	40143	14264	13086	14403
46.5333	4186	21093	26820	4186	9140	12344	8918	33808	40198	14352	13179	14484
46.5417	4227	21146	26863	4227	9203	12412	8952	33866	40259	14439	13266	14573
46.55	4270	21198	26906	4270	9265	12481	8989	33922	40326	14527	13349	14665
46.5583	4313	21250	26946	4313	9329	12550	9026	33982	40387	14617	13437	14756
46.5667	4356	21301	26997	4356	9392	12616	9067	34045	40444	14709	13521	14847
46.575	4406	21349	27052	4406	9454	12678	9104	34108	40499	14798	13603	14931
46.5833	4462	21392	27109	4462	9519	12746	9140	34170	40557	14884	13689	15015
46.5917	4513	21434	27164	4513	9577	12815	9177	34234	40620	14980	13777	15105
46.6	4556	21478	27217	4556	9632	12888	9206	34288	40684	15075	13869	15199
46.6083	4601	21528	27268	4601	9682	12952	9240	34343	40748	15160	13954	15295
46.6167	4649	21588	27314	4649	9745	13021	9275	34402	40805	15246	14037	15394
46.625	4701	21643	27358	4701	9816	13092	9305	34460	40859	15332	14122	15491
46.6333	4750	21696	27402	4750	9882	13161	9333	34519	40917	15430	14209	15579
46.6417	4797	21750	27451	4797	9944	13229	9364	34574	40976	15525	14293	15664
46.65	4845	21804	27498	4845	10007	13298	9401	34626	41037	15621	14380	15750
46.6583	4891	21852	27547	4891	10072	13362	9438	34685	41096	15717	14466	15837
46.6667	4933	21897	27595	4933	10136	13428	9472	34750	41150	15810	14558	15925
46.675	4978	21943	27651	4978	10206	13499	9511	34816	41209	15898	14642	16015
46.6833	5029	21998	27706	5029	10266	13575	9549	34874	41269	15993	14730	16105
46.6917	5074	22054	27754	5074	10322	13642	9586	34932	41329	16091	14824	16199
46.7	5119	22104	27803	5119	10379	13711	9626	34994	41387	16191	14914	16292
46.7083	5166	22161	27852	5166	10441	13778	9660	35050	41443	16285	15003	16386
46.7167	5212	22219	27898	5212	10504	13846	9694	35105	41500	16375	15089	16480
46.725	5258	22279	27946	5258	10564	13921	9728	35158	41551	16465	15178	16572
46.7333	5299	22328	27997	5299	10622	13989	9763	35214	41608	16554	15264	16667
46.7417	5344	22365	28044	5344	10687	14055	9798	35269	41665	16639	15348	16758
46.75	5397	22408	28093	5397	10751	14126	9834	35328	41721	16723	15434	16847
46.7583	5457	22460	28142	5457	10818	14198	9871	35388	41775	16812	15529	16926
46.7667	5514	22515	28185	5514	10883	14270	9904	35442	41835	16906	15625	17011
46.775	5565	22567	28236	5565	10942	14340	9933	35500	41894	17000	15715	17100
46.7833	5616	22614	28285	5616	11005	14407	9967	35557	41951	17095	15805	17195
46.7917	5665	22659	28326	5665	11069	14469	10005	35618	42007	17188	15901	17293
46.8	5711	22707	28369	5711	11135	14535	10044	35676	42066	17286	15994	17396
46.8083	5764	22758	28417	5764	11199	14608	10081	35731	42120	17385	16085	17500
46.8167	5821	22813	28472	5821	11269	14683	10114	35789	42172	17478	16174	17604
46.825	5875	22863	28528	5875	11333	14756	10147	35851	42226	17559	16268	17692
46.8333	5929	22911	28582	5929	11388	14832	10186	35909	42285	17639	16360	17773
46.8417	5979	22953	28632	5979	11447	14903	10224	35957	42348	17728	16444	17865
46.85	6029	22992	28680	6029	11511	14973	10259	36005	42411	17824	16534	17963
46.8583	6085	23041	28722	6085	11576	15042	10296	36060	42476	17918	16628	18064
46.8667	6136	23093	28767	6136	11648	15109	10341	36114	42542	18013	16727	18163
46.875	6184	23146	28812	6184	11716	15176	10384	36169	42601	18113	16829	18260
46.8833	6230	23196	28861	6230	11785	15246	10422	36222	42660	18214	16926	18352
46.8917	6283	23240	28911	6283	11846	15317	10459	36279	42723	18305	17021	18443
46.9	6334	23289	28955	6334	11908	15384	10489	36334	42788	18398	17114	18536
46.9083	6375	23343	28994	6375	11975	15455	10519	36390	42850	18496	17206	18635
46.9167	6423	23393	29039	6423	12040	15520	10552	36447	42910	18602	17301	18734
46.925	6474	23444	29088	6474	12104	15582	10589	36499	42968	18703	17396	18833
46.9333	6527	23489	29133	6527	12164	15655	10629	36550	43025	18808	17489	18931
46.9417	6585	23538	29176	6585	12225	15730	10667	36600	43082	18917	17577	19027
46.95	6646	23589	29224	6646	12292	15804	10698	36650	43133	19022	17663	19118
46.9583	6706	23638	29277	6706	12358	15874	10731	36708	43181	19118	17750	19208
46.9667	6766	23688	29333	6766	12427	15938	10772	36764	43228	19214	17840	19301
46.975	6825	23735	29383	6825	12498	16008	10812	36815	43285	19302	17933	19393
46.9833	6878	23781	29427	6878	12561	16080	10855	36868	43345	19391	18023	19485
46.9917	6925	23825	29473	6925	12617	16152	10896	36922	43399	19485	18118	19578
47	6973	23865	29520	6973	12678	16220	10934	36977	43446	19580	18221	19670
47.0083	7021	23903	29569	7021	12744	16289	10968	37029	43490	19679	18318	19761
47.0167	7074	23942	29621	7074	12810	16360	10998	37081	43541	19778	18415	19855
47.025	7133	23989	29668	7133	12879	16427	11027	37131	43602	19876	18508	19967
47.0333	7190	24038	29716	7190	12943	16494	11063	37186	43657	19964	18605	20070
47.0417	7243	24087	29762	7243	13005	16564	11101	37246	43711	20057	18708	20161
47.05	7292	24133	29811	7292	13067	16637	11142	37302	43767	20148	18815	20244
47.0583	7344	24172	29862	7344	13133	16711	11180	37356	43827	20232	18918	20332
47.0667	7394	24210	29905	7394	13194	16783	11218	37407	43884	20321	19017	20427
47.075	7441	24255	29946	7441	13254	16853	11256	37457	43934	20418	19107	20521
47.0833	7497	24306	29986	7497	13313	16925	11295	37513	43977	20510	19196	20612
47.0917	7558	24356	30024	7558	13377	16996	11338	37574	44028	20611	19294	20705
47.1	7619	24400	30070	7619	13440	17063	11375	37627	44079	20723	19390	20809
47.1083	7676	24444	30121	7676	13503	17131	11412	37678	44129	20835	19488	20910
47.1167	7735	24495	30173	7735	13571	17203	11457	37727	44177	20944	19583	21005
47.125	7796	24547	30222	7796	13638	17277	11495	37776	44228	21050	19680	21099
47.1333	7862	24591	30268	7862	13705	17345	11530	37826	44279	21149	19773	21206
47.1417	7926	24636	30311	7926	13777	17421	11563	37872	44331	21246	19865	21310
47.15	7982	24676	30351	7982	13849	17496	11600	37922	44383	21345	19957	21408
47.1583	8034	24713	30394	8034	13917	17561	11640	37977	44440	21441	20047	21505
47.1667	8086	24758	30445	8086	13981	17630	11677	38027	44494	21540	20132	21598
47.175	8141	24802	30493	8141	14041	17699	11717	38068	44545	21645	20223	21690
47.1833	8189	24846	30529	8189	14105	17768	11752	38110	44596	21748	20311	21781
47.1917	8238	24894	30565	8238	14167	17838	11786	38157	44647	21839	20401	21873
47.2	8288	24948	30605	8288	14234	17911	11825	38203	44693	21927	20496	21965
47.2083	8344	24993	30647	8344	14303	17984	11861	38253	44742	22019	20589	22057
47.2167	8399	25031	30686	8399	14375	18045	11898	38308	44794	22113	20686	22156
47.225	8454	25075	30729	8454	14446	18111	11938	38359	44846	22214	20785	22255
47.2333	8508	25118	30776	8508	14515	18179	11980	38412	44895	22321	20875	22350
47.2417	8568	25161	30820	8568	14570	18243	12016	38463	44946	22423	20963	22450
47.25	8632	25207	30865	8632	14628	18311	12050	38512	44993	22527	21056	22540
47.2583	8697	25248	30908	8697	14700	18374	12087	38559	45041	22629	21138	22627
47.2667	8758	25292	30948	8758	14768	18443	12125	38606	45096	22733	21218	22713
47.275	8816	25334	30992	8816	14838	18519	12163	38649	45148	22835	21304	22801
47.2833	8876	25378	31034	8876	14905	18595	12206	38697	45194	22933	21398	22891
47.2917	8935	25419	31074	8935	14965	18662	12250	38746	45242	23031	21493	22984
47.3	8991	25462	31120	8991	15025	18733	12291	38793	45291	23122	21586	23076
47.3083	9051	25501	31168	9051	15089	18805	12336	38838	45337	23215	21676	23174
47.3167	9107	25542	31217	9107	15150	18871	12377	38886	45382	23316	21762	23273
47.325	9167	25590	31258	9167	15211	18934	12411	38936	45431	23418	21852	23377
47.3333	9227	25636	31297	9227	15273	19005	12451	38983	45481	23522	21947	23482
47.3417	9286	25677	31335	9286	15338	19079	12493	39030	45531	23625	22042	23586
47.35	9345	25718	31374	9345	15407	19147	12532	39081	45579	23733	22140	23688
47.3583	9407	25766	31416	9407	15478	19216	12567	39130	45623	23835	22235	23787
47.3667	9472	25807	31462	9472	15547	19284	12601	39176	45667	23928	22323	23880
47.375	9532	25848	31503	9532	15611	19355	12638	39223	45711	24018	22403	23974
47.3833	9585	25889	31547	9585	15671	19428	12679	39270	45754	24107	22483	24074
47.3917	9634	25925	31587	9634	15732	19498	12720	39318	45802	24203	22570	24173
47.4	9687	25961	31627	9687	15798	19563	12757	39370	45851	24306	22667	24261
47.4083	9743	25999	31670	9743	15862	19628	12799	39419	45900	24411	22772	24357
47.4167	9807	26036	31707	9807	15928	19697	12841	39462	45952	24513	22876	24457
47.425	9870	26070	31742	9870	15994	19768	12879	39502	45999	24619	22969	24550
47.4333	9927	26104	31785	9927	16056	19841	12922	39541	46041	24723	23051	24640
47.4417	9988	26146	31837	9988	16117	19911	12961	39584	46090	24818	23134	24731
47.45	10048	26188	31882	10048	16180	19978	13000	39622	46139	24916	23227	24824
47.4583	10106	26232	31920	10106	16246	20045	13038	39665	46192	25024	23323	24919
47.4667	10170	26276	31956	10170	16314	20113	13076	39711	46244	25130	23419	25016
47.475	10234	26315	31995	10234	16383	20181	13113	39755	46293	25243	23511	25114
47.4833	10294	26359	32033	10294	16451	20250	13151	39805	46332	25356	23604	25205
47.4917	10361	26400	32072	10361	16512	20316	13190	39851	46367	25454	23701	25301
47.5	10427	26437	32109	10427	16574	20384	13232	39893	46407	25546	23802	25406
47.5083	10489	26472	32146	10489	16644	20455	13275	39935	46449	25637	23895	25509
47.5167	10547	26510	32185	10547	16709	20528	13316	39981	46491	25737	23981	25606
47.525	10607	26550	32231	10607	16773	20600	13359	40027	46537	25833	24063	25703
47.5333	10667	26596	32270	10667	16836	20668	13398	40070	46578	25919	24155	25799
47.5417	10730	26640	32312	10730	16899	20735	13437	40117	46618	26012	24241	25894
47.55	10794	26674	32353	10794	16960	20803	13472	40161	46658	26107	24332	25993
47.5583	10858	26707	32392	10858	17016	20869	13502	40200	46699	26199	24426	26091
47.5667	10914	26743	32426	10914	17078	20937	13536	40234	46740	26295	24527	26192
47.575	10967	26781	32458	10967	17141	21005	13582	40275	46779	26394	24626	26290
47.5833	11021	26818	32498	11021	17208	21069	13631	40319	46814	26490	24720	26375
47.5917	11081	26855	32538	11081	17284	21137	13678	40360	46852	26584	24806	26462
47.6	11150	26884	32587	11150	17349	21206	13719	40403	46896	26676	24884	26550
47.6083	11219	26918	32639	11219	17409	21270	13758	40445	46939	26771	24965	26637
47.6167	11287	26955	32678	11287	17471	21337	13798	40486	46978	26870	25049	26726
47.625	11349	26991	32711	11349	17534	21402	13833	40525	47014	26971	25139	26814
47.6333	11406	27028	32745	11406	17597	21461	13872	40560	47058	27069	25232	26905
47.6417	11462	27064	32778	11462	17665	21526	13910	40605	47099	27167	25313	27001
47.65	11519	27099	32820	11519	17732	21602	13948	40653	47145	27262	25395	27102
47.6583	11577	27137	32857	11577	17792	21668	13986	40697	47192	27356	25481	27205
47.6667	11630	27178	32890	11630	17854	21734	14022	40740	47236	27451	25567	27306
47.675	11688	27220	32926	11688	17912	21803	14063	40778	47279	27542	25662	27400
47.6833	11751	27258	32959	11751	17972	21869	14113	40822	47327	27636	25759	27488
47.6917	11815	27293	32998	11815	18037	21936	14157	40865	47375	27734	25850	27571
47.7	11873	27322	33040	11873	18100	21998	14198	40901	47407	27831	25932	27655
47.7083	11929	27353	33072	11929	18165	22062	14239	40934	47441	27926	26019	27737
47.7167	11987	27382	33108	11987	18229	22128	14274	40970	47477	28018	26106	27826
47.725	12051	27419	33143	12051	18294	22198	14310	41014	47513	28105	26197	27918
47.7333	12115	27453	33179	12115	18360	22267	14347	41060	47551	28196	26287	28008
47.7417	12174	27489	33215	12174	18427	22336	14388	41098	47591	28287	26377	28095
47.75	12235	27528	33253	12235	18488	22395	14430	41134	47629	28384	26463	28186
47.7583	12297	27569	33290	12297	18546	22449	14472	41167	47664	28480	26549	28282
47.7667	12361	27605	33324	12361	18608	22509	14520	41202	47701	28576	26640	28377
47.775	12427	27630	33360	12427	18671	22576	14566	41241	47737	28676	26731	28474
47.7833	12488	27656	33393	12488	18736	22643	14609	41272	47773	28767	26817	28570
47.7917	12548	27688	33421	12548	18795	22704	14652	41305	47807	28856	26913	28656
47.8	12611	27721	33453	12611	18854	22767	14691	41347	47836	28945	27013	28741
47.8083	12674	27756	33490	12674	18917	22830	14728	41385	47866	29040	27109	28833
47.8167	12736	27784	33524	12736	18981	22896	14763	41419	47899	29138	27199	28918
47.825	12801	27814	33558	12801	19042	22967	14801	41455	47937	29233	27286	29000
47.8333	12864	27848	33594	12864	19101	23037	14836	41491	47976	29333	27371	29080
47.8417	12927	27887	33628	12927	19165	23102	14873	41528	48015	29432	27457	29165
47.85	12999	27921	33664	12999	19224	23170	14915	41567	48057	29534	27535	29256
47.8583	13065	27950	33690	13065	19279	23234	14962	41598	48097	29634	27600	29348
47.8667	13123	27977	33717	13123	19341	23292	15012	41628	48138	29728	27677	29439
47.875	13185	28008	33752	13185	19399	23356	15060	41661	48174	29828	27763	29538
47.8833	13240	28040	33785	13240	19453	23422	15105	41696	48214	29931	27854	29622
47.8917	13296	28070	33819	13296	19515	23485	15146	41731	48249	30023	27947	29698
47.9	13353	28097	33856	13353	19588	23547	15184	41772	48275	30114	28041	29781
47.9083	13412	28125	33898	13412	19657	23613	15218	41815	48299	30204	28131	29867
47.9167	13470	28159	33938	13470	19719	23681	15257	41857	48331	30296	28214	29955
47.925	13531	28198	33977	13531	19776	23746	15303	41895	48367	30379	28302	30048
47.9333	13596	28230	34009	13596	19834	23811	15348	41929	48402	30462	28391	30135
47.9417	13660	28259	34041	13660	19898	23874	15393	41962	48429	30548	28486	30220
47.95	13718	28289	34068	13718	19957	23934	15435	41998	48460	30643	28574	30301
47.9583	13779	28320	34095	13779	20008	23990	15474	42035	48489	30739	28658	30379
47.9667	13840	28349	34125	13840	20064	24044	15518	42064	48519	30834	28741	30456
47.975	13900	28383	34151	13900	20128	24108	15565	42094	48549	30933	28824	30531
47.9833	13961	28413	34181	13961	20190	24179	15612	42129	48582	31028	28912	30615
47.9917	14023	28443	34209	14023	20247	24251	15654	42162	48615	31118	28995	30710
48	14085	28476	34240	14085	20305	24317	15696	42192	48652	31195	29076	30798
48.0083	14143	28509	34267	14143	20361	24383	15737	42223	48686	31275	29161	30879
48.0167	14200	28542	34294	14200	20414	24444	15779	42261	48717	31359	29248	30961
48.025	14259	28568	34324	14259	20469	24503	15819	42291	48749	31450	29327	31049
48.0333	14317	28594	34358	14317	20537	24559	15862	42318	48779	31543	29399	31142
48.0417	14378	28615	34391	14378	20603	24613	15907	42345	48809	31638	29476	31231
48.05	14441	28644	34424	14441	20669	24675	15948	42372	48839	31731	29560	31317
48.0583	14504	28670	34456	14504	20731	24742	15996	42400	48868	31816	29647	31397
48.0667	14570	28697	34485	14570	20791	24803	16045	42428	48897	31898	29735	31469
48.075	14635	28727	34512	14635	20847	24863	16095	42458	48926	31985	29820	31544
48.0833	14695	28755	34543	14695	20900	24931	16145	42492	48949	32071	29901	31628
48.0917	14748	28778	34574	14748	20955	24995	16194	42525	48976	32155	29980	31720
48.1	14803	28798	34602	14803	21011	25056	16242	42560	49001	32241	30056	31803
48.1083	14864	28824	34627	14864	21071	25122	16286	42589	49023	32327	30135	31881
48.1167	14930	28855	34658	14930	21135	25178	16328	42617	49051	32418	30214	31963
48.125	15003	28887	34691	15003	21198	25228	16375	42645	49080	32514	30297	32048
48.1333	15067	28919	34719	15067	21258	25279	16423	42672	49111	32603	30375	32128
48.1417	15123	28948	34745	15123	21319	25339	16474	42699	49140	32693	30448	32204
48.15	15174	28978	34777	15174	21381	25417	16522	42729	49168	32785	30517	32279
48.1583	15229	29007	34807	15229	21439	25491	16561	42758	49197	32878	30597	32357
48.1667	15287	29031	34827	15287	21502	25555	16603	42785	49224	32961	30679	32444
48.175	15346	29050	34851	15346	21566	25609	16654	42807	49252	33041	30763	32529
48.1833	15405	29069	34877	15405	21626	25661	16712	42839	49282	33121	30840	32610
48.1917	15458	29101	34904	15458	21683	25716	16766	42875	49311	33203	30915	32683
48.2	15510	29133	34933	15510	21736	25775	16816	42910	49338	33284	30988	32752
48.2083	15572	29155	34965	15572	21793	25832	16864	42940	49373	33357	31062	32825
48.2167	15636	29173	34998	15636	21843	25895	16918	42969	49404	33434	31143	32901
48.225	15690	29194	35024	15690	21901	25953	16972	42998	49430	33521	31225	32986
48.2333	15746	29217	35048	15746	21960	26012	17023	43023	49455	33611	31304	33077
48.2417	15811	29237	35072	15811	22010	26074	17069	43048	49477	33697	31382	33166
48.25	15871	29259	35100	15871	22063	26135	17114	43076	49499	33781	31452	33243
48.2583	15929	29283	35129	15929	22121	26197	17165	43103	49529	33861	31521	33319
48.2667	15986	29310	35161	15986	22182	26252	17216	43128	49557	33939	31580	33400
48.275	16042	29337	35190	16042	22243	26312	17269	43153	49582	34017	31644	33478
48.2833	16104	29363	35216	16104	22300	26372	17319	43182	49606	34095	31713	33562
48.2917	16166	29391	35237	16166	22359	26429	17366	43207	49630	34174	31793	33647
48.3	16229	29417	35260	16229	22417	26491	17414	43236	49649	34258	31880	33724
48.3083	16291	29439	35277	16291	22471	26551	17461	43262	49673	34341	31960	33797
48.3167	16351	29454	35297	16351	22526	26609	17517	43284	49698	34427	32039	33866
48.325	16409	29468	35319	16409	22580	26663	17571	43305	49718	34513	32115	33934
48.3333	16467	29492	35347	16467	22634	26715	17622	43331	49735	34590	32191	33998
48.3417	16526	29519	35369	16526	22687	26776	17674	43354	49756	34662	32265	34059
48.35	16583	29545	35396	16583	22736	26836	17731	43374	49778	34732	32332	34128
48.3583	16644	29570	35420	16644	22783	26884	17781	43402	49806	34804	32398	34203
48.3667	16705	29592	35449	16705	22835	26942	17836	43432	49834	34881	32461	34272
48.375	16757	29612	35484	16757	22895	27007	17887	43462	49859	34960	32527	34339
48.3833	16810	29636	35514	16810	22954	27074	17936	43492	49883	35039	32602	34406
48.3917	16865	29664	35538	16865	23002	27136	17988	43515	49902	35115	32677	34478
48.4	16924	29692	35557	16924	23052	27193	18042	43537	49920	35190	32750	34555
48.4083	16987	29711	35579	16987	23111	27251	18093	43559	49939	35271	32821	34633
48.4167	17046	29735	35598	17046	23172	27305	18148	43581	49962	35357	32887	34707
48.425	17105	29761	35619	17105	23234	27359	18204	43602	49984	35438	32952	34780
48.4333	17164	29784	35643	17164	23284	27418	18254	43628	50011	35511	33022	34848
48.4417	17218	29804	35669	17218	23330	27478	18302	43651	50040	35585	33088	34915
48.45	17272	29824	35697	17272	23381	27536	18352	43671	50068	35661	33151	34982
48.4583	17330	29845	35720	17330	23433	27588	18400	43688	50088	35740	33218	35052
48.4667	17388	29869	35742	17388	23486	27643	18452	43704	50105	35816	33293	35126
48.475	17443	29891	35765	17443	23538	27699	18503	43723	50126	35891	33367	35201
48.4833	17495	29913	35790	17495	23596	27751	18557	43750	50146	35967	33436	35273
48.4917	17548	29932	35812	17548	23653	27805	18610	43780	50163	36045	33503	35335
48.5	17610	29951	35834	17610	23701	27859	18665	43798	50184	36125	33576	35388
48.5083	17668	29971	35859	17668	23752	27911	18720	43821	50201	36198	33645	35454
48.5167	17726	29993	35887	17726	23811	27961	18773	43844	50219	36263	33711	35529
48.525	17781	30018	35904	17781	23864	28008	18824	43867	50244	36328	33776	35603
48.5333	17834	30042	35919	17834	23911	28059	18876	43888	50267	36402	33847	35674
48.5417	17889	30065	35935	17889	23959	28119	18927	43908	50289	36477	33926	35740
48.55	17946	30087	35953	17946	24009	28175	18982	43928	50310	36553	33997	35807
48.5583	18005	30110	35968	18005	24064	28229	19037	43945	50325	36630	34065	35872
48.5667	18058	30131	35989	18058	24120	28280	19093	43961	50339	36707	34133	35946
48.575	18109	30154	36011	18109	24176	28338	19149	43980	50356	36779	34194	36014
48.5833	18158	30171	36036	18158	24225	28393	19206	44004	50376	36849	34248	36077
48.5917	18210	30187	36059	18210	24265	28448	19254	44023	50394	36928	34304	36131
48.6	18270	30203	36072	18270	24315	28503	19305	44046	50414	37003	34363	36192
48.6083	18324	30225	36092	18324	24372	28552	19364	44071	50434	37074	34424	36265
48.6167	18375	30246	36115	18375	24426	28601	19420	44092	50451	37148	34478	36341
48.625	18426	30265	36135	18426	24473	28652	19473	44110	50469	37219	34538	36407
48.6333	18476	30283	36150	18476	24522	28704	19526	44128	50484	37290	34604	36468
48.6417	18528	30300	36170	18528	24570	28756	19574	44145	50497	37355	34676	36530
48.65	18582	30320	36191	18582	24620	28808	19627	44162	50514	37425	34746	36596
48.6583	18641	30341	36207	18641	24667	28859	19681	44181	50532	37494	34814	36658
48.6667	18698	30359	36226	18698	24712	28905	19729	44205	50552	37563	34883	36714
48.675	18755	30376	36243	18755	24756	28952	19781	44226	50571	37623	34939	36775
48.6833	18813	30396	36254	18813	24807	29002	19839	44248	50592	37687	34996	36842
48.6917	18861	30421	36273	18861	24852	29059	19894	44264	50614	37749	35059	36903
48.7	18908	30447	36296	18908	24900	29112	19950	44274	50633	37813	35121	36957
48.7083	18960	30467	36316	18960	24953	29161	20012	44283	50646	37885	35189	37017
48.7167	19022	30482	36335	19022	25004	29212	20066	44291	50658	37960	35251	37082
48.725	19080	30499	36357	19080	25048	29265	20114	44311	50678	38023	35307	37138
48.7333	19131	30514	36376	19131	25098	29312	20168	44337	50700	38077	35365	37194
48.7417	19182	30531	36395	19182	25159	29360	20221	44357	50712	38134	35435	37246
48.75	19235	30550	36416	19235	25215	29413	20272	44378	50720	38195	35501	37307
48.7583	19295	30567	36432	19295	25264	29472	20327	44398	50731	38261	35559	37382
48.7667	19349	30583	36446	19349	25309	29527	20376	44413	50746	38331	35616	37451
48.775	19403	30601	36458	19403	25355	29576	20423	44428	50771	38402	35672	37507
48.7833	19459	30628	36471	19459	25398	29621	20476	44448	50789	38471	35722	37561
48.7917	19508	30648	36486	19508	25445	29671	20535	44464	50804	38533	35776	37618
48.8	19557	30663	36504	19557	25490	29727	20593	44487	50823	38594	35833	37676
48.8083	19606	30676	36524	19606	25534	29781	20646	44510	50842	38656	35893	37740
48.8167	19660	30692	36544	19660	25588	29835	20700	44524	50854	38720	35953	37800
48.825	19714	30710	36566	19714	25637	29883	20753	44536	50865	38785	36017	37855
48.8333	19766	30725	36587	19766	25681	29927	20806	44549	50876	38846	36085	37909
48.8417	19817	30739	36604	19817	25726	29972	20859	44562	50888	38907	36144	37965
48.85	19867	30758	36620	19867	25769	30018	20916	44575	50902	38975	36202	38025
48.8583	19918	30776	36635	19918	25811	30067	20975	44597	50915	39036	36257	38084
48.8667	19971	30792	36647	19971	25856	30119	21031	44622	50932	39091	36310	38145
48.875	20027	30809	36664	20027	25904	30166	21085	44643	50949	39152	36364	38203
48.8833	20090	30822	36680	20090	25944	30215	21134	44662	50965	39217	36409	38255
48.8917	20149	30837	36697	20149	25991	30263	21180	44679	50980	39285	36466	38304
48.9	20203	30854	36715	20203	26045	30307	21229	44697	50995	39348	36530	38353
48.9083	20253	30869	36732	20253	26095	30353	21281	44708	51013	39411	36596	38407
48.9167	20299	30883	36745	20299	26141	30403	21340	44716	51030	39471	36661	38460
48.925	20343	30888	36757	20343	26188	30455	21402	44726	51043	39519	36718	38522
48.9333	20390	30902	36767	20390	26239	30507	21451	44742	51058	39569	36775	38583
48.9417	20438	30919	36778	20438	26282	30562	21494	44761	51072	39628	36833	38636
48.95	20486	30938	36793	20486	26320	30615	21546	44778	51087	39692	36887	38684
48.9583	20538	30952	36814	20538	26365	30663	21599	44787	51103	39753	36935	38727
48.9667	20588	30964	36830	20588	26411	30711	21656	44800	51122	39805	36986	38774
48.975	20642	30977	36851	20642	26459	30760	21708	44815	51138	39865	37040	38823
48.9833	20698	30993	36869	20698	26507	30810	21763	44830	51154	39926	37092	38884
48.9917	20760	31010	36880	20760	26548	30859	21813	44849	51167	39985	37149	38943
49	20813	31035	36883	20813	26589	30903	21861	44876	51183	40049	37200	39002
49.0083	20864	31053	36891	20864	26633	30947	21911	44894	51204	40115	37250	39056
49.0167	20912	31065	36902	20912	26678	30994	21965	44902	51222	40171	37299	39104
49.025	20960	31076	36913	20960	26727	31037	22021	44914	51237	40218	37343	39157
49.0333	21007	31085	36918	21007	26772	31081	22078	44927	51254	40273	37388	39217
49.0417	21056	31089	36927	21056	26815	31130	22133	44941	51277	40322	37440	39267
49.05	21107	31104	36941	21107	26859	31175	22187	44957	51294	40382	37484	39322
49.0583	21161	31126	36956	21161	26905	31220	22242	44978	51307	40450	37517	39380
49.0667	21211	31138	36972	21211	26950	31271	22296	44995	51320	40511	37560	39439
49.075	21257	31150	36990	21257	26994	31312	22346	45006	51335	40562	37609	39489
49.0833	21300	31165	37008	21300	27038	31355	22396	45015	51343	40614	37660	39531
49.0917	21344	31183	37020	21344	27086	31403	22444	45026	51353	40668	37716	39572
49.1	21393	31199	37033	21393	27129	31448	22491	45041	51367	40718	37765	39617
49.1083	21437	31213	37047	21437	27168	31490	22540	45058	51380	40769	37809	39663
49.1167	21477	31227	37061	21477	27211	31536	22590	45078	51393	40822	37860	39709
49.125	21529	31245	37075	21529	27248	31581	22645	45098	51408	40881	37908	39753
49.1333	21584	31258	37088	21584	27283	31623	22695	45113	51418	40936	37952	39799
49.1417	21642	31269	37101	21642	27319	31668	22747	45126	51427	40987	37998	39849
49.15	21696	31278	37111	21696	27362	31718	22800	45137	51434	41034	38050	39896
49.1583	21749	31286	37119	21749	27409	31763	22851	45156	51445	41082	38102	39936
49.1667	21799	31293	37128	21799	27455	31807	22901	45176	51459	41124	38156	39988
49.175	21845	31302	37137	21845	27496	31851	22951	45188	51474	41173	38208	40041
49.1833	21889	31315	37149	21889	27534	31897	23002	45203	51491	41218	38253	40074
49.1917	21929	31329	37162	21929	27577	31944	23059	45217	51502	41259	38292	40111
49.2	21971	31344	37177	21971	27623	31991	23114	45228	51514	41304	38334	40149
49.2083	22018	31358	37187	22018	27667	32041	23165	45238	51532	41357	38377	40183
49.2167	22065	31370	37195	22065	27708	32090	23213	45243	51547	41410	38407	40221
49.225	22115	31381	37204	22115	27748	32138	23261	45251	51558	41460	38447	40263
49.2333	22166	31391	37214	22166	27788	32186	23311	45259	51572	41507	38488	40309
49.2417	22216	31398	37224	22216	27823	32229	23359	45263	51586	41547	38529	40353
49.25	22266	31404	37237	22266	27864	32266	23405	45270	51594	41588	38574	40394
49.2583	22315	31409	37250	22315	27916	32307	23454	45285	51600	41634	38632	40441
49.2667	22360	31420	37262	22360	27972	32351	23504	45304	51611	41687	38684	40485
49.275	22402	31434	37273	22402	28018	32396	23559	45324	51617	41740	38722	40527
49.2833	22444	31446	37279	22444	28058	32436	23619	45339	51630	41791	38758	40572
49.2917	22487	31457	37284	22487	28091	32481	23672	45353	51647	41840	38791	40615
49.3	22527	31466	37297	22527	28123	32525	23720	45367	51660	41882	38823	40654
49.3083	22572	31484	37315	22572	28160	32573	23772	45382	51665	41923	38859	40690
49.3167	22620	31495	37327	22620	28194	32622	23824	45393	51673	41959	38898	40724
49.325	22669	31499	37334	22669	28229	32667	23875	45408	51679	41994	38937	40768
49.3333	22719	31500	37347	22719	28269	32710	23921	45426	51687	42038	38973	40811
49.3417	22770	31506	37357	22770	28315	32754	23970	45440	51696	42091	39006	40851
49.35	22822	31518	37366	22822	28357	32796	24018	45451	51707	42147	39040	40893
49.3583	22872	31532	37378	22872	28392	32837	24067	45460	51722	42193	39081	40936
49.3667	22919	31552	37388	22919	28426	32881	24117	45465	51741	42237	39124	40977
49.375	22960	31570	37393	22960	28465	32927	24166	45471	51759	42277	39160	41016
49.3833	22997	31581	37402	22997	28509	32966	24211	45485	51771	42317	39189	41050
49.3917	23033	31589	37416	23033	28550	33010	24261	45500	51776	42353	39224	41084
49.4	23071	31597	37430	23071	28588	33058	24313	45511	51785	42398	39265	41122
49.4083	23110	31609	37443	23110	28624	33097	24360	45521	51794	42445	39304	41161
49.4167	23154	31620	37452	23154	28660	33137	24416	45535	51801	42487	39339	41203
49.425	23199	31631	37463	23199	28701	33175	24474	45548	51811	42525	39368	41248
49.4333	23249	31637	37471	23249	28744	33222	24525	45558	51820	42558	39407	41284
49.4417	23294	31642	37477	23294	28785	33272	24575	45567	51823	42594	39449	41323
49.45	23337	31644	37485	23337	28821	33315	24621	45579	51828	42638	39495	41360
49.4583	23383	31644	37489	23383	28858	33353	24674	45590	51837	42681	39538	41392
49.4667	23426	31643	37498	23426	28898	33392	24728	45595	51847	42720	39573	41420
49.475	23471	31653	37505	23471	28939	33433	24778	45600	51861	42759	39597	41442
49.4833	23516	31668	37510	23516	28980	33475	24826	45608	51875	42792	39628	41470
49.4917	23554	31684	37514	23554	29011	33514	24873	45617	51889	42827	39660	41511
49.5	23589	31691	37524	23589	29044	33562	24921	45627	51898	42864	39694	41548
49.5083	23631	31697	37538	23631	29080	33610	24971	45636	51907	42896	39740	41589
49.5167	23676	31708	37547	23676	29120	33653	25024	45646	51920	42931	39782	41628
49.525	23717	31714	37551	23717	29161	33694	25080	45658	51929	42969	39816	41661
49.5333	23755	31721	37555	23755	29199	33731	25134	45670	51934	43014	39842	41691
49.5417	23791	31730	37559	23791	29237	33761	25188	45679	51932	43053	39865	41724
49.55	23832	31734	37568	23832	29276	33792	25241	45686	51933	43090	39890	41761
49.5583	23874	31738	37577	23874	29310	33826	25290	45693	51935	43123	39915	41796
49.5667	23917	31748	37583	23917	29348	33863	25337	45698	51936	43153	39936	41830
49.575	23955	31760	37588	23955	29385	33903	25386	45704	51936	43190	39970	41867
49.5833	23998	31772	37590	23998	29427	33948	25438	45712	51936	43230	40000	41898
49.5917	24039	31779	37592	24039	29460	33993	25484	45716	51941	43272	40029	41928
49.6	24080	31782	37595	24080	29493	34036	25529	45724	51943	43310	40068	41962
49.6083	24116	31792	37601	24116	29527	34079	25573	45733	51949	43345	40113	41995
49.6167	24161	31801	37608	24161	29564	34118	25622	45743	51960	43386	40151	42035
49.625	24206	31807	37622	24206	29596	34161	25674	45756	51969	43430	40171	42072
49.6333	24248	31815	37635	24248	29624	34201	25725	45765	51977	43474	40192	42105
49.6417	24286	31818	37640	24286	29657	34240	25771	45767	51986	43509	40216	42144
49.65	24330	31822	37645	24330	29696	34274	25819	45772	51992	43540	40238	42175
49.6583	24373	31828	37645	24373	29732	34313	25871	45779	51994	43573	40265	42196
49.6667	24412	31834	37649	24412	29773	34356	25925	45787	52006	43614	40295	42223
49.675	24446	31840	37655	24446	29816	34399	25975	45795	52017	43653	40332	42253
49.6833	24486	31845	37661	24486	29856	34442	26026	45804	52023	43681	40360	42283
49.6917	24529	31845	37670	24529	29887	34485	26071	45817	52024	43707	40380	42317
49.7	24568	31845	37676	24568	29921	34518	26115	45828	52030	43723	40402	42351
49.7083	24604	31851	37676	24604	29957	34552	26167	45832	52038	43748	40424	42381
49.7167	24638	31855	37676	24638	30001	34587	26221	45836	52040	43785	40449	42411
49.725	24673	31858	37679	24673	30046	34629	26268	45838	52041	43816	40481	42441
49.7333	24707	31862	37684	24707	30078	34670	26313	45840	52037	43849	40512	42471
49.7417	24738	31863	37692	24738	30109	34716	26360	45845	52034	43883	40549	42498
49.75	24776	31869	37702	24776	30140	34760	26412	45859	52039	43920	40588	42529
49.7583	24815	31878	37709	24815	30170	34794	26468	45873	52049	43957	40624	42558
49.7667	24859	31890	37710	24859	30200	34825	26515	45883	52056	43982	40649	42585
49.775	24898	31905	37709	24898	30237	34858	26558	45884	52057	44014	40665	42607
49.7833	24930	31923	37707	24930	30267	34893	26603	45887	52061	44057	40688	42637
49.7917	24966	31939	37708	24966	30295	34929	26648	45891	52066	44098	40713	42667
49.8	25012	31946	37715	25012	30327	34967	26694	45893	52065	44136	40741	42692
49.8083	25050	31953	37721	25050	30369	34999	26741	45896	52064	44165	40764	42722
49.8167	25082	31959	37728	25082	30405	35033	26788	45901	52062	44195	40785	42762
49.825	25113	31965	37733	25113	30437	35071	26839	45904	52061	44228	40814	42794
49.8333	25149	31969	37733	25149	30466	35107	26889	45908	52061	44257	40842	42820
49.8417	25177	31974	37730	25177	30497	35147	26936	45918	52060	44278	40864	42846
49.85	25211	31979	37726	25211	30534	35189	26985	45925	52061	44299	40885	42872
49.8583	25249	31986	37722	25249	30572	35227	27032	45927	52065	44320	40907	42897
49.8667	25291	31997	37723	25291	30608	35263	27081	45930	52070	44345	40936	42920
49.875	25335	32008	37731	25335	30646	35299	27129	45941	52076	44372	40958	42941
49.8833	25371	32015	37739	25371	30682	35336	27174	45953	52079	44401	40976	42975
49.8917	25403	32020	37750	25403	30713	35371	27218	45960	52075	44430	40992	43005
49.9	25436	32024	37757	25436	30740	35407	27268	45961	52068	44460	41002	43033
49.9083	25470	32035	37754	25470	30775	35448	27322	45961	52069	44496	41015	43058
49.9167	25508	32042	37748	25508	30804	35487	27367	45962	52070	44528	41049	43083
49.925	25548	32042	37753	25548	30832	35530	27411	45965	52076	44552	41078	43115
49.9333	25587	32042	37754	25587	30864	35568	27464	45965	52086	44582	41101	43142
49.9417	25619	32043	37753	25619	30898	35603	27512	45970	52094	44611	41116	43165
49.95	25658	32055	37756	25658	30933	35635	27559	45974	52093	44640	41140	43190
49.9583	25696	32068	37760	25696	30966	35663	27610	45973	52090	44668	41163	43213
49.9667	25734	32074	37761	25734	31000	35688	27656	45975	52086	44694	41195	43237
49.975	25769	32077	37761	25769	31035	35717	27700	45978	52085	44716	41218	43267
49.9833	25801	32083	37762	25801	31070	35755	27746	45984	52088	44737	41232	43295
49.9917	25833	32085	37769	25833	31101	35798	27793	45986	52093	44766	41245	43321
50	25870	32088	37770	25870	31129	35843	27838	45988	52100	44798	41254	43346
50.0083	25904	32090	37771	25904	31162	35888	27879	45988	52096	44824	41272	43372
50.0167	25937	32092	37771	25937	31199	35924	27923	45991	52087	44849	41304	43406
50.025	25969	32096	37778	25969	31237	35955	27969	45992	52085	44875	41341	43434
50.0333	26000	32106	37787	26000	31272	35989	28014	45990	52081	44906	41367	43452
50.0417	26033	32112	37791	26033	31306	36027	28062	45992	52079	44934	41382	43470
50.05	26070	32124	37789	26070	31332	36070	28111	45997	52078	44961	41395	43492
50.0583	26111	32137	37791	26111	31354	36110	28156	46006	52080	44987	41409	43517
50.0667	26154	32149	37791	26154	31376	36151	28197	46010	52081	45013	41422	43547
50.075	26183	32150	37792	26183	31404	36186	28244	46010	52081	45030	41436	43566
50.0833	26216	32156	37798	26216	31443	36218	28292	46013	52082	45053	41455	43584
50.0917	26253	32165	37800	26253	31482	36253	28342	46013	52082	45076	41475	43597
50.1	26290	32166	37800	26290	31520	36286	28388	46014	52080	45097	41491	43620
50.1083	26324	32172	37797	26324	31555	36319	28432	46015	52077	45107	41510	43649
50.1167	26362	32178	37795	26362	31586	36354	28475	46015	52072	45120	41535	43680
50.125	26402	32187	37797	26402	31621	36390	28521	46014	52069	45147	41556	43705
50.1333	26440	32200	37800	26440	31653	36428	28568	46015	52074	45171	41570	43720
50.1417	26474	32206	37804	26474	31677	36467	28614	46023	52079	45199	41577	43744
50.15	26513	32217	37800	26513	31704	36499	28661	46024	52082	45219	41586	43774
50.1583	26556	32228	37793	26556	31735	36531	28711	46019	52084	45232	41597	43801
50.1667	26598	32238	37794	26598	31762	36572	28760	46013	52086	45250	41609	43820
50.175	26635	32239	37796	26635	31792	36613	28801	46017	52085	45276	41630	43834
50.1833	26670	32236	37795	26670	31824	36649	28834	46026	52082	45304	41656	43847
50.1917	26710	32241	37792	26710	31860	36686	28871	46030	52078	45329	41675	43854
50.2	26752	32246	37795	26752	31890	36724	28916	46034	52081	45349	41690	43871
50.2083	26791	32254	37799	26791	31918	36759	28964	46039	52086	45369	41706	43892
50.2167	26821	32264	37801	26821	31950	36789	29008	46039	52088	45384	41727	43916
50.225	26849	32280	37800	26849	31978	36817	29054	46041	52087	45408	41740	43942
50.2333	26885	32291	37802	26885	32012	36848	29101	46049	52090	45443	41744	43970
50.2417	26918	32294	37804	26918	32050	36880	29150	46050	52091	45464	41755	43990
50.25	26956	32300	37811	26956	32083	36913	29196	46046	52091	45477	41770	44013
50.2583	26991	32308	37813	26991	32114	36954	29241	46044	52089	45493	41789	44041
50.2667	27023	32312	37811	27023	32142	36992	29284	46043	52087	45516	41805	44062
50.275	27060	32319	37811	27060	32166	37026	29329	46044	52088	45546	41825	44086
50.2833	27099	32328	37811	27099	32194	37055	29371	46043	52085	45567	41842	44104
50.2917	27135	32340	37816	27135	32226	37085	29413	46042	52084	45582	41856	44123
50.3	27168	32345	37824	27168	32261	37121	29458	46043	52083	45600	41881	44139
50.3083	27199	32347	37828	27199	32293	37161	29503	46045	52083	45611	41907	44150
50.3167	27231	32355	37829	27231	32323	37206	29547	46046	52087	45621	41925	44161
50.325	27266	32358	37828	27266	32356	37241	29596	46043	52092	45631	41939	44177
50.3333	27304	32358	37823	27304	32386	37265	29643	46042	52094	45642	41944	44198
50.3417	27337	32368	37823	27337	32418	37287	29681	46044	52087	45664	41950	44218
50.35	27368	32375	37824	27368	32448	37314	29718	46043	52082	45689	41961	44226
50.3583	27400	32380	37818	27400	32473	37348	29762	46047	52082	45721	41965	44242
50.3667	27436	32385	37816	27436	32504	37389	29805	46047	52083	45744	41968	44267
50.375	27472	32387	37817	27472	32541	37432	29852	46046	52077	45771	41982	44284
50.3833	27509	32390	37817	27509	32573	37471	29897	46047	52073	45799	41995	44295
50.3917	27547	32393	37820	27547	32601	37502	29939	46047	52079	45822	42007	44313
50.4	27582	32402	37822	27582	32627	37534	29981	46048	52081	45836	42014	44333
50.4083	27617	32408	37826	27617	32650	37563	30022	46047	52078	45854	42024	44345
50.4167	27651	32419	37827	27651	32674	37600	30060	46041	52074	45870	42043	44355
50.425	27684	32426	37824	27684	32704	37637	30105	46036	52075	45886	42051	44369
50.4333	27716	32428	37822	27716	32739	37670	30151	46038	52076	45902	42060	44384
50.4417	27749	32432	37826	27749	32771	37701	30192	46040	52078	45914	42075	44396
50.45	27784	32439	37831	27784	32802	37735	30233	46037	52075	45926	42089	44411
50.4583	27815	32438	37835	27815	32836	37770	30278	46034	52067	45934	42103	44426
50.4667	27848	32439	37838	27848	32867	37797	30326	46031	52061	45946	42113	44435
50.475	27882	32451	37836	27882	32895	37828	30367	46028	52055	45954	42117	44447
50.4833	27923	32457	37832	27923	32921	37861	30403	46023	52049	45967	42126	44461
50.4917	27958	32456	37831	27958	32950	37890	30441	46017	52043	45977	42138	44475
50.5	27987	32463	37828	27987	32979	37921	30487	46017	52040	45982	42145	44483
50.5083	28012	32465	37827	28012	33008	37954	30536	46015	52030	45996	42145	44486
50.5167	28037	32468	37828	28037	33033	37980	30580	46016	52025	46008	42148	44492
50.525	28070	32472	37831	28070	33062	38013	30626	46018	52022	46015	42156	44508
50.5333	28098	32474	37829	28098	33101	38049	30674	46018	52023	46021	42166	44520
50.5417	28123	32480	37827	28123	33139	38078	30719	46012	52016	46028	42169	44534
50.55	28156	32480	37824	28156	33168	38101	30763	46005	52009	46032	42175	44548
50.5583	28185	32482	37824	28185	33190	38125	30800	45999	52010	46034	42182	44565
50.5667	28215	32488	37822	28215	33211	38156	30834	45998	52004	46034	42185	44583
50.575	28242	32496	37821	28242	33234	38191	30871	46003	52001	46037	42189	44592
50.5833	28269	32501	37825	28269	33267	38222	30910	46009	51993	46040	42198	44599
50.5917	28299	32502	37825	28299	33294	38254	30952	46003	51985	46040	42212	44612
50.6	28328	32501	37826	28328	33325	38285	30990	45995	51973	46047	42216	44632
50.6083	28361	32503	37827	28361	33351	38320	31031	45987	51963	46055	42210	44649
50.6167	28392	32505	37828	28392	33379	38351	31072	45980	51958	46060	42206	44656
50.625	28423	32511	37831	28423	33411	38376	31113	45978	51956	46077	42201	44667
50.6333	28455	32514	37833	28455	33441	38402	31158	45980	51953	46091	42201	44673
50.6417	28481	32515	37835	28481	33461	38432	31202	45976	51946	46100	42202	44676
50.65	28505	32518	37838	28505	33478	38464	31238	45970	51939	46104	42203	44667
50.6583	28527	32523	37840	28527	33497	38493	31273	45966	51934	46105	42207	44672
50.6667	28554	32524	37840	28554	33530	38522	31312	45970	51927	46106	42201	44683
50.675	28587	32520	37841	28587	33566	38551	31350	45967	51921	46112	42197	44688
50.6833	28615	32516	37840	28615	33592	38580	31389	45958	51913	46118	42195	44701
50.6917	28647	32511	37836	28647	33619	38610	31430	45949	51908	46124	42196	44702
50.7	28674	32513	37833	28674	33642	38636	31470	45945	51900	46131	42202	44698
50.7083	28706	32513	37835	28706	33663	38661	31513	45938	51890	46136	42208	44696
50.7167	28734	32512	37835	28734	33686	38685	31557	45925	51883	46142	42208	44703
50.725	28757	32514	37835	28757	33707	38709	31597	45915	51873	46144	42207	44714
50.7333	28779	32516	37834	28779	33730	38729	31635	45906	51867	46148	42203	44721
50.7417	28797	32516	37838	28797	33758	38750	31677	45899	51859	46152	42196	44725
50.75	28820	32514	37843	28820	33788	38774	31717	45893	51848	46161	42192	44720
50.7583	28851	32515	37848	28851	33819	38804	31754	45897	51842	46170	42194	44714
50.7667	28879	32520	37849	28879	33850	38832	31789	45896	51835	46171	42194	44710
50.775	28900	32522	37845	28900	33872	38860	31825	45890	51824	46176	42198	44709
50.7833	28909	32521	37838	28909	33892	38886	31863	45882	51815	46178	42200	44717
50.7917	28927	32522	37834	28927	33908	38910	31900	45873	51805	46179	42191	44730
50.8	28952	32518	37831	28952	33923	38927	31934	45863	51796	46175	42185	44742
50.8083	28976	32511	37823	28976	33946	38950	31969	45853	51786	46165	42186	44754
50.8167	29005	32509	37820	29005	33971	38977	32009	45843	51780	46160	42187	44764
50.825	29031	32516	37818	29031	33996	39006	32050	45839	51775	46162	42190	44774
50.8333	29058	32524	37813	29058	34022	39033	32095	45836	51766	46169	42192	44777
50.8417	29083	32529	37811	29083	34046	39055	32141	45827	51756	46171	42186	44772
50.85	29103	32528	37809	29103	34066	39074	32179	45821	51749	46170	42178	44769
50.8583	29117	32528	37807	29117	34087	39092	32210	45815	51734	46167	42165	44773
50.8667	29131	32511	37808	29131	34110	39113	32243	45804	51716	46164	42152	44778
50.875	29151	32502	37810	29151	34124	39138	32280	45791	51704	46156	42151	44781
50.8833	29176	32500	37810	29176	34143	39165	32319	45774	51697	46146	42152	44783
50.8917	29201	32502	37799	29201	34164	39193	32355	45760	51685	46133	42157	44782
50.9	29222	32505	37792	29222	34190	39214	32389	45760	51668	46124	42160	44777
50.9083	29240	32505	37789	29240	34214	39235	32430	45761	51656	46127	42156	44774
50.9167	29263	32506	37787	29263	34235	39260	32470	45760	51646	46130	42154	44779
50.925	29281	32498	37786	29281	34249	39282	32504	45751	51638	46129	42151	44786
50.9333	29304	32493	37782	29304	34263	39305	32538	45740	51625	46130	42145	44784
50.9417	29325	32493	37781	29325	34278	39331	32572	45730	51610	46131	42134	44779
50.95	29348	32494	37776	29348	34300	39350	32608	45722	51594	46128	42122	44776
50.9583	29369	32496	37777	29369	34327	39367	32645	45713	51584	46130	42111	44774
50.9667	29390	32500	37775	29390	34351	39381	32684	45705	51578	46128	42104	44778
50.975	29411	32505	37774	29411	34376	39400	32721	45698	51570	46120	42104	44783
50.9833	29431	32499	37770	29431	34399	39426	32758	45691	51561	46113	42105	44779
50.9917	29448	32496	37764	29448	34422	39455	32788	45685	51552	46120	42092	44772
51	29468	32494	37757	29468	34449	39475	32817	45679	51544	46121	42079	44772
51.0083	29484	32495	37753	29484	34469	39488	32848	45675	51533	46118	42072	44768
51.0167	29501	32493	37751	29501	34494	39506	32879	45666	51517	46116	42063	44760
51.025	29521	32486	37752	29521	34511	39523	32917	45657	51500	46115	42059	44752
51.0333	29541	32484	37746	29541	34524	39543	32949	45644	51485	46115	42055	44751
51.0417	29563	32487	37739	29563	34538	39561	32974	45632	51470	46116	42041	44753
51.05	29591	32487	37739	29591	34555	39582	33009	45619	51455	46118	42031	44751
51.0583	29612	32484	37732	29612	34575	39602	33045	45615	51439	46113	42017	44747
51.0667	29632	32477	37721	29632	34593	39622	33074	45606	51425	46104	41995	44755
51.075	29650	32474	37715	29650	34610	39637	33104	45594	51414	46093	41977	44768
51.0833	29665	32478	37712	29665	34630	39655	33135	45585	51406	46082	41966	44770
51.0917	29680	32485	37709	29680	34651	39675	33163	45576	51399	46069	41958	44764
51.1	29699	32480	37706	29699	34674	39701	33198	45561	51389	46062	41955	44756
51.1083	29722	32471	37701	29722	34695	39728	33232	45544	51375	46061	41945	44754
51.1167	29742	32470	37695	29742	34713	39751	33261	45530	51357	46057	41934	44756
51.125	29756	32465	37688	29756	34725	39770	33297	45521	51342	46051	41927	44749
51.1333	29772	32464	37679	29772	34739	39793	33336	45516	51325	46041	41930	44748
51.1417	29792	32472	37669	29792	34754	39811	33374	45512	51309	46036	41939	44748
51.15	29818	32481	37661	29818	34769	39826	33403	45505	51293	46033	41936	44747
51.1583	29834	32485	37663	29834	34785	39845	33426	45492	51280	46028	41934	44741
51.1667	29845	32485	37660	29845	34803	39863	33455	45476	51264	46023	41928	44738
51.175	29860	32479	37657	29860	34825	39880	33490	45461	51252	46014	41919	44740
51.1833	29879	32477	37653	29879	34847	39906	33522	45452	51241	46000	41903	44753
51.1917	29896	32479	37641	29896	34872	39926	33557	45445	51235	45998	41889	44770
51.2	29910	32480	37628	29910	34896	39947	33590	45440	51228	45995	41881	44776
51.2083	29933	32475	37619	29933	34913	39965	33626	45431	51216	45985	41881	44770
51.2167	29956	32477	37606	29956	34932	39983	33662	45420	51198	45970	41875	44756
51.225	29970	32475	37599	29970	34951	40002	33688	45412	51185	45963	41865	44744
51.2333	29988	32476	37596	29988	34974	40022	33712	45406	51177	45962	41864	44735
51.2417	30005	32480	37593	30005	34996	40046	33738	45393	51164	45956	41864	44723
51.25	30020	32481	37589	30020	35021	40071	33765	45378	51146	45941	41865	44721
51.2583	30036	32482	37583	30036	35039	40097	33798	45366	51129	45937	41860	44717
51.2667	30056	32481	37575	30056	35053	40127	33832	45357	51109	45936	41844	44715
51.275	30079	32480	37563	30079	35066	40159	33865	45353	51094	45930	41829	44715
51.2833	30098	32481	37552	30098	35090	40188	33894	45349	51079	45922	41818	44706
51.2917	30119	32482	37542	30119	35115	40211	33922	45338	51059	45909	41805	44698
51.3	30139	32485	37534	30139	35139	40225	33955	45325	51045	45890	41803	44703
51.3083	30158	32485	37525	30158	35157	40240	33989	45308	51032	45881	41797	44709
51.3167	30172	32482	37516	30172	35171	40253	34023	45292	51021	45883	41796	44716
51.325	30191	32480	37512	30191	35189	40269	34054	45285	51012	45884	41793	44719
51.3333	30217	32485	37502	30217	35208	40294	34079	45283	50998	45883	41792	44723
51.3417	30238	32496	37497	30238	35230	40321	34101	45273	50985	45881	41791	44731
51.35	30261	32500	37495	30261	35260	40345	34128	45267	50967	45874	41783	44747
51.3583	30288	32497	37491	30288	35286	40366	34161	45265	50948	45871	41773	44752
51.3667	30306	32492	37486	30306	35301	40389	34189	45258	50935	45869	41765	44745
51.375	30315	32490	37476	30315	35314	40409	34219	45244	50926	45864	41761	44740
51.3833	30327	32496	37467	30327	35336	40425	34254	45235	50914	45859	41751	44737
51.3917	30340	32509	37463	30340	35355	40444	34288	45228	50900	45850	41748	44743
51.4	30352	32517	37453	30352	35371	40466	34315	45221	50879	45837	41744	44741
51.4083	30372	32523	37444	30372	35384	40494	34340	45213	50871	45822	41738	44742
51.4167	30396	32529	37436	30396	35404	40521	34365	45208	50869	45807	41734	44746
51.425	30419	32533	37426	30419	35423	40537	34386	45200	50860	45796	41731	44745
51.4333	30446	32534	37411	30446	35443	40555	34407	45191	50839	45791	41727	44747
51.4417	30469	32540	37401	30469	35464	40578	34434	45184	50821	45790	41729	44755
51.45	30489	32544	37395	30489	35490	40600	34468	45176	50807	45787	41717	44758
51.4583	30503	32540	37391	30503	35521	40626	34499	45167	50795	45779	41708	44760
51.4667	30523	32540	37387	30523	35542	40654	34521	45159	50784	45783	41701	44754
51.475	30546	32541	37381	30546	35561	40680	34545	45151	50773	45776	41690	44744
51.4833	30565	32548	37373	30565	35576	40703	34575	45140	50757	45758	41678	44742
51.4917	30581	32552	37364	30581	35599	40727	34602	45130	50742	45745	41665	44740
51.5	30593	32562	37360	30593	35623	40751	34626	45124	50729	45728	41649	44745
51.5083	30604	32572	37348	30604	35651	40775	34655	45120	50719	45716	41633	44756
51.5167	30616	32578	37327	30616	35677	40799	34687	45115	50704	45712	41620	44760
51.525	30631	32584	37314	30631	35698	40826	34719	45106	50689	45708	41613	44754
51.5333	30651	32591	37314	30651	35717	40862	34751	45098	50676	45698	41599	44753
51.5417	30671	32597	37312	30671	35733	40888	34781	45093	50664	45693	41582	44760
51.55	30695	32606	37311	30695	35754	40909	34804	45089	50656	45693	41575	44764
51.5583	30713	32606	37311	30713	35779	40931	34825	45093	50648	45689	41569	44769
51.5667	30732	32613	37306	30732	35807	40950	34846	45087	50637	45690	41565	44773
51.575	30755	32623	37296	30755	35834	40969	34876	45078	50629	45689	41557	44777
51.5833	30775	32627	37283	30775	35855	40991	34905	45068	50619	45686	41551	44775
51.5917	30795	32629	37271	30795	35875	41019	34932	45061	50607	45675	41544	44769
51.6	30818	32639	37262	30818	35892	41049	34961	45053	50597	45663	41537	44771
51.6083	30835	32649	37257	30835	35912	41083	34990	45047	50592	45650	41540	44770
51.6167	30854	32665	37247	30854	35935	41114	35020	45045	50589	45644	41539	44772
51.625	30879	32676	37241	30879	35955	41142	35046	45048	50578	45642	41529	44777
51.6333	30903	32679	37240	30903	35980	41161	35072	45048	50559	45647	41513	44780
51.6417	30927	32681	37246	30927	36010	41182	35101	45042	50546	45643	41502	44783
51.65	30944	32683	37250	30944	36035	41213	35132	45036	50539	45633	41493	44797
51.6583	30965	32690	37244	30965	36064	41245	35164	45033	50530	45622	41489	44814
51.6667	30987	32701	37236	30987	36098	41276	35192	45031	50522	45613	41487	44819
51.675	31006	32715	37230	31006	36125	41300	35218	45032	50512	45603	41483	44813
51.6833	31031	32725	37222	31031	36148	41322	35243	45031	50497	45594	41479	44810
51.6917	31054	32731	37210	31054	36177	41344	35268	45027	50484	45587	41466	44810
51.7	31076	32734	37200	31076	36211	41369	35299	45020	50479	45585	41448	44804
51.7083	31090	32744	37194	31090	36242	41399	35330	45016	50475	45585	41436	44800
51.7167	31108	32754	37186	31108	36269	41429	35357	45011	50469	45581	41427	44799
51.725	31127	32764	37182	31127	36294	41467	35380	45010	50460	45572	41415	44804
51.7333	31141	32777	37180	31141	36312	41505	35404	45012	50452	45559	41411	44817
51.7417	31159	32793	37174	31159	36335	41536	35433	45017	50442	45548	41406	44825
51.75	31180	32808	37171	31180	36360	41564	35461	45015	50438	45542	41400	44820
51.7583	31205	32815	37169	31205	36382	41585	35490	45014	50432	45537	41396	44810
51.7667	31229	32821	37161	31229	36404	41607	35518	45009	50427	45528	41394	44811
51.775	31252	32830	37152	31252	36427	41628	35548	45006	50419	45527	41390	44814
51.7833	31274	32836	37148	31274	36449	41651	35573	45004	50412	45528	41380	44815
51.7917	31289	32846	37147	31289	36475	41673	35599	45001	50407	45528	41381	44815
51.8	31302	32860	37144	31302	36501	41693	35627	45001	50397	45521	41378	44821
51.8083	31313	32878	37140	31313	36528	41719	35652	44999	50385	45514	41366	44826
51.8167	31330	32891	37139	31330	36553	41745	35675	44998	50375	45505	41358	44830
51.825	31358	32908	37141	31358	36572	41767	35701	44994	50370	45497	41340	44839
51.8333	31384	32918	37145	31384	36594	41796	35728	44994	50371	45487	41324	44844
51.8417	31407	32921	37141	31407	36622	41826	35750	44995	50374	45474	41319	44840
51.85	31429	32927	37133	31429	36650	41850	35774	44994	50369	45461	41311	44838
51.8583	31448	32936	37127	31448	36675	41876	35801	44989	50357	45450	41304	44846
51.8667	31467	32945	37127	31467	36703	41906	35828	44987	50347	45449	41289	44849
51.875	31490	32950	37135	31490	36732	41936	35856	44989	50339	45450	41272	44841
51.8833	31508	32952	37134	31508	36760	41964	35887	44993	50330	45450	41259	44830
51.8917	31524	32957	37130	31524	36781	41991	35915	44998	50320	45441	41253	44813
51.9	31543	32967	37130	31543	36798	42020	35943	45004	50320	45432	41245	44804
51.9083	31560	32977	37125	31560	36822	42048	35972	45006	50316	45422	41238	44807
51.9167	31579	32992	37121	31579	36850	42071	35997	45013	50314	45407	41230	44818
51.925	31598	33010	37125	31598	36872	42103	36020	45009	50320	45397	41222	44824
51.9333	31618	33021	37127	31618	36896	42132	36046	45003	50322	45391	41213	44827
51.9417	31639	33035	37125	31639	36922	42160	36075	45002	50324	45383	41206	44829
51.95	31661	33045	37127	31661	36950	42188	36104	45003	50324	45374	41199	44831
51.9583	31680	33052	37131	31680	36979	42214	36133	45007	50319	45366	41194	44833
51.9667	31693	33061	37137	31693	37004	42246	36164	45013	50315	45357	41189	44833
51.975	31707	33073	37131	31707	37026	42274	36193	45015	50307	45351	41183	44827
51.9833	31720	33086	37122	31720	37050	42298	36222	45012	50296	45344	41176	44820
51.9917	31739	33098	37125	31739	37076	42326	36247	45007	50286	45335	41161	44816
52	31763	33106	37130	31763	37100	42348	36275	45007	50279	45320	41150	44807
52.0083	31789	33111	37129	31789	37130	42375	36302	45007	50275	45308	41146	44793
52.0167	31806	33109	37131	31806	37164	42402	36326	45011	50273	45300	41140	44787
52.025	31824	33112	37134	31824	37194	42430	36350	45017	50269	45294	41132	44789
52.0333	31843	33121	37140	31843	37211	42459	36382	45017	50266	45288	41125	44794
52.0417	31861	33132	37147	31861	37228	42485	36413	45019	50264	45285	41106	44785
52.05	31879	33141	37149	31879	37249	42503	36439	45018	50262	45276	41094	44779
52.0583	31898	33144	37148	31898	37264	42523	36462	45014	50262	45265	41078	44786
52.0667	31916	33149	37152	31916	37281	42553	36485	45013	50259	45257	41060	44784
52.075	31929	33160	37153	31929	37304	42578	36508	45013	50252	45247	41049	44775
52.0833	31948	33174	37154	31948	37331	42601	36540	45019	50247	45238	41039	44766
52.0917	31965	33185	37158	31965	37357	42625	36574	45025	50241	45219	41030	44760
52.1	31979	33197	37164	31979	37377	42645	36606	45036	50232	45203	41022	44757
52.1083	31991	33203	37170	31991	37397	42668	36630	45046	50227	45189	41013	44754
52.1167	32007	33208	37174	32007	37420	42695	36646	45046	50222	45177	41001	44741
52.125	32022	33217	37176	32022	37447	42728	36661	45045	50220	45163	40999	44728
52.1333	32034	33221	37171	32034	37473	42754	36683	45044	50222	45155	40990	44723
52.1417	32042	33229	37170	32042	37496	42772	36709	45046	50222	45142	40973	44716
52.15	32054	33239	37176	32054	37517	42790	36736	45047	50216	45127	40959	44703
52.1583	32069	33247	37185	32069	37532	42807	36763	45044	50211	45111	40948	44695
52.1667	32084	33251	37185	32084	37551	42827	36795	45040	50202	45082	40933	44683
52.175	32100	33259	37191	32100	37574	42852	36829	45035	50195	45059	40929	44667
52.1833	32108	33267	37199	32108	37596	42877	36861	45035	50192	45041	40914	44662
52.1917	32120	33267	37205	32120	37614	42899	36891	45043	50191	45028	40897	44664
52.2	32136	33270	37219	32136	37640	42918	36912	45051	50191	45014	40886	44663
52.2083	32152	33280	37227	32152	37664	42939	36928	45058	50191	45006	40874	44655
52.2167	32160	33290	37233	32160	37683	42957	36952	45056	50188	44997	40857	44649
52.225	32174	33299	37232	32174	37699	42977	36976	45048	50184	44984	40842	44638
52.2333	32184	33304	37230	32184	37712	42994	37002	45046	50176	44972	40832	44627
52.2417	32188	33310	37228	32188	37730	43009	37026	45042	50165	44954	40822	44619
52.25	32192	33312	37231	32192	37753	43025	37047	45040	50155	44935	40799	44612
52.2583	32202	33309	37237	32202	37773	43045	37069	45038	50146	44917	40772	44603
52.2667	32217	33308	37243	32217	37793	43066	37092	45037	50136	44897	40745	44592
52.275	32228	33314	37249	32228	37809	43086	37115	45035	50130	44875	40720	44574
52.2833	32240	33319	37251	32240	37823	43105	37135	45036	50126	44854	40695	44553
52.2917	32252	33319	37255	32252	37840	43128	37160	45036	50120	44829	40672	44544
52.3	32259	33322	37261	32259	37857	43147	37192	45037	50117	44812	40658	44532
52.3083	32270	33326	37266	32270	37874	43167	37218	45037	50115	44805	40642	44520
52.3167	32277	33325	37272	32277	37889	43188	37242	45034	50112	44794	40623	44509
52.325	32280	33320	37276	32280	37908	43206	37264	45036	50108	44787	40605	44496
52.3333	32280	33316	37279	32280	37926	43223	37285	45031	50101	44763	40586	44489
52.3417	32284	33316	37284	32284	37944	43237	37305	45031	50093	44739	40565	44479
52.35	32291	33323	37291	32291	37956	43255	37326	45024	50081	44707	40545	44462
52.3583	32291	33335	37294	32291	37965	43272	37351	45018	50066	44680	40523	44446
52.3667	32294	33341	37298	32294	37976	43286	37373	45013	50058	44666	40508	44427
52.375	32303	33333	37305	32303	37993	43303	37392	45005	50052	44658	40499	44404
52.3833	32312	33326	37308	32312	38012	43314	37410	44995	50046	44645	40492	44379
52.3917	32314	33327	37308	32314	38028	43330	37426	44988	50039	44624	40478	44362
52.4	32317	33330	37310	32317	38036	43343	37448	44986	50029	44604	40466	44342
52.4083	32314	33336	37318	32314	38047	43352	37464	44984	50018	44587	40457	44322
52.4167	32311	33336	37328	32311	38061	43365	37482	44974	50006	44565	40439	44301
52.425	32309	33326	37334	32309	38078	43372	37499	44969	49989	44541	40419	44275
52.4333	32314	33319	37336	32314	38091	43384	37519	44966	49971	44523	40403	44255
52.4417	32314	33319	37336	32314	38102	43396	37539	44964	49958	44504	40386	44242
52.45	32320	33324	37345	32320	38112	43408	37561	44955	49945	44484	40364	44234
52.4583	32328	33323	37356	32328	38122	43420	37581	44944	49931	44453	40338	44218
52.4667	32331	33324	37364	32331	38131	43433	37596	44939	49915	44428	40314	44201
52.475	32336	33322	37370	32336	38144	43444	37611	44939	49903	44401	40285	44184
52.4833	32334	33314	37369	32334	38154	43457	37629	44933	49892	44377	40252	44158
52.4917	32331	33310	37365	32331	38160	43466	37652	44918	49876	44352	40225	44128
52.5	32327	33308	37370	32327	38170	43477	37673	44907	49866	44334	40200	44104
52.5083	32323	33313	37373	32323	38177	43484	37690	44891	49860	44316	40172	44091
52.5167	32320	33310	37371	32320	38185	43492	37714	44873	49852	44286	40144	44077
52.525	32317	33300	37374	32317	38191	43498	37734	44856	49844	44257	40130	44052
52.5333	32317	33298	37387	32317	38210	43513	37742	44846	49839	44229	40126	44020
52.5417	32317	33299	37399	32317	38216	43529	37749	44842	49828	44204	40110	43987
52.55	32316	33295	37403	32316	38210	43536	37767	44838	49817	44175	40087	43954
52.5583	32304	33289	37397	32304	38213	43535	37790	44824	49799	44137	40051	43925
52.5667	32293	33285	37393	32293	38219	43535	37806	44809	49780	44102	40009	43904
52.575	32293	33283	37393	32293	38227	43539	37825	44801	49759	44071	39979	43894
52.5833	32298	33283	37396	32298	38226	43544	37842	44791	49738	44033	39953	43877
52.5917	32296	33278	37397	32296	38231	43554	37856	44780	49720	43995	39924	43855
52.6	32289	33269	37395	32289	38232	43566	37868	44770	49700	43958	39908	43833
52.6083	32285	33266	37399	32285	38231	43583	37883	44759	49682	43932	39885	43819
52.6167	32280	33267	37406	32280	38238	43599	37901	44745	49666	43908	39852	43802
52.625	32270	33260	37410	32270	38242	43607	37914	44724	49650	43883	39816	43776
52.6333	32260	33253	37411	32260	38252	43614	37925	44707	49631	43851	39786	43750
52.6417	32251	33251	37413	32251	38259	43618	37938	44691	49606	43814	39751	43725
52.65	32241	33251	37415	32241	38255	43625	37949	44673	49583	43784	39712	43697
52.6583	32232	33246	37416	32232	38261	43632	37958	44658	49559	43758	39667	43657
52.6667	32224	33235	37416	32224	38266	43628	37968	44644	49536	43734	39625	43613
52.675	32215	33228	37417	32215	38270	43624	37979	44632	49513	43710	39592	43581
52.6833	32201	33218	37422	32201	38269	43624	37991	44617	49490	43666	39572	43558
52.6917	32189	33207	37424	32189	38267	43630	38006	44601	49471	43620	39546	43531
52.7	32184	33204	37424	32184	38271	43639	38016	44585	49450	43579	39518	43504
52.7083	32181	33203	37428	32181	38276	43651	38026	44566	49430	43540	39497	43481
52.7167	32175	33197	37434	32175	38281	43655	38034	44545	49406	43504	39468	43460
52.725	32171	33188	37432	32171	38284	43652	38043	44524	49379	43475	39434	43430
52.7333	32168	33180	37427	32168	38289	43651	38053	44500	49356	43453	39408	43395
52.7417	32164	33176	37419	32164	38291	43655	38063	44477	49332	43424	39379	43365
52.75	32152	33170	37412	32152	38300	43657	38070	44459	49305	43382	39350	43337
52.7583	32134	33161	37408	32134	38312	43662	38072	44444	49278	43340	39325	43311
52.7667	32125	33147	37405	32125	38321	43660	38079	44426	49251	43299	39298	43285
52.775	32118	33136	37404	32118	38322	43665	38085	44408	49224	43256	39262	43257
52.7833	32113	33131	37401	32113	38319	43670	38088	44382	49197	43211	39220	43228
52.7917	32108	33129	37396	32108	38318	43676	38099	44357	49171	43174	39183	43204
52.8	32104	33124	37388	32104	38315	43683	38112	44336	49143	43132	39155	43173
52.8083	32099	33119	37384	32099	38315	43693	38122	44316	49116	43094	39127	43145
52.8167	32084	33111	37376	32084	38319	43700	38130	44296	49092	43057	39097	43119
52.825	32074	33101	37377	32074	38324	43700	38132	44272	49061	43014	39071	43089
52.8333	32064	33094	37379	32064	38327	43701	38132	44248	49032	42977	39039	43060
52.8417	32054	33084	37374	32054	38331	43705	38133	44226	49010	42942	39010	43029
52.85	32054	33081	37367	32054	38330	43707	38136	44203	48980	42905	38980	42989
52.8583	32052	33080	37365	32052	38328	43711	38142	44177	48946	42873	38945	42958
52.8667	32046	33071	37364	32046	38329	43711	38149	44145	48911	42839	38908	42929
52.875	32042	33066	37362	32042	38335	43717	38158	44116	48877	42802	38866	42907
52.8833	32037	33064	37356	32037	38340	43727	38166	44096	48842	42763	38828	42891
52.8917	32030	33059	37351	32030	38350	43730	38168	44072	48808	42726	38796	42875
52.9	32017	33058	37344	32017	38359	43727	38169	44044	48777	42689	38759	42858
52.9083	32005	33056	37337	32005	38360	43725	38167	44018	48749	42654	38729	42826
52.9167	31996	33048	37327	31996	38360	43725	38164	43991	48722	42613	38700	42783
52.925	31989	33035	37313	31989	38366	43727	38162	43969	48693	42566	38664	42742
52.9333	31979	33021	37305	31979	38370	43725	38164	43947	48660	42518	38625	42713
52.9417	31970	33007	37298	31970	38365	43722	38165	43916	48624	42475	38588	42691
52.95	31961	33002	37296	31961	38364	43727	38167	43888	48595	42441	38550	42666
52.9583	31955	33006	37299	31955	38371	43733	38169	43864	48567	42400	38515	42639
52.9667	31951	33012	37290	31951	38379	43733	38167	43840	48529	42361	38486	42608
52.975	31944	33011	37277	31944	38389	43741	38171	43817	48489	42329	38453	42580
52.9833	31940	33002	37266	31940	38392	43749	38179	43788	48459	42301	38422	42551
52.9917	31935	33000	37260	31935	38393	43754	38182	43759	48436	42271	38396	42509
53	31922	33001	37247	31922	38393	43758	38184	43735	48414	42241	38366	42467
53.0083	31908	32991	37234	31908	38393	43762	38186	43707	48386	42203	38325	42441
53.0167	31895	32983	37223	31895	38396	43765	38187	43677	48353	42165	38282	42414
53.025	31889	32982	37212	31889	38403	43770	38191	43647	48320	42130	38243	42386
53.0333	31883	32982	37202	31883	38408	43770	38197	43617	48285	42090	38213	42359
53.0417	31876	32980	37196	31876	38408	43777	38194	43588	48248	42049	38187	42328
53.05	31865	32980	37187	31865	38413	43783	38186	43559	48212	42006	38160	42297
53.0583	31856	32977	37176	31856	38425	43791	38178	43528	48176	41961	38131	42268
53.0667	31850	32975	37164	31850	38436	43804	38168	43498	48142	41923	38096	42233
53.075	31847	32972	37151	31847	38444	43813	38157	43466	48105	41889	38058	42200
53.0833	31840	32972	37139	31840	38457	43818	38153	43438	48066	41848	38017	42182
53.0917	31836	32972	37126	31836	38469	43818	38151	43411	48028	41806	37982	42164
53.1	31830	32974	37110	31830	38483	43827	38147	43386	47991	41769	37949	42132
53.1083	31823	32978	37095	31823	38487	43840	38140	43356	47959	41736	37907	42099
53.1167	31819	32978	37085	31819	38490	43853	38137	43323	47925	41703	37874	42071
53.125	31814	32972	37079	31814	38492	43864	38134	43293	47889	41665	37842	42045
53.1333	31808	32973	37070	31808	38495	43868	38132	43263	47854	41630	37807	42019
53.1417	31810	32977	37051	31810	38507	43879	38130	43232	47822	41599	37778	41989
53.15	31816	32983	37033	31816	38521	43890	38128	43207	47789	41569	37753	41958
53.1583	31818	32983	37019	31818	38532	43894	38124	43181	47753	41538	37725	41936
53.1667	31816	32981	37007	31816	38544	43901	38122	43148	47713	41498	37693	41920
53.175	31807	32989	36992	31807	38556	43917	38122	43121	47677	41461	37662	41905
53.1833	31794	32997	36973	31794	38572	43935	38118	43096	47644	41426	37632	41878
53.1917	31790	32998	36956	31790	38590	43948	38108	43069	47604	41393	37599	41851
53.2	31784	33002	36942	31784	38602	43953	38104	43040	47560	41356	37573	41832
53.2083	31778	33004	36929	31778	38609	43964	38106	43014	47520	41320	37546	41810
53.2167	31777	33007	36917	31777	38623	43974	38106	42987	47482	41284	37512	41793
53.225	31780	33010	36905	31780	38634	43981	38102	42953	47448	41250	37481	41777
53.2333	31775	33015	36889	31775	38644	43993	38101	42916	47408	41217	37457	41760
53.2417	31771	33020	36873	31771	38656	44008	38095	42881	47375	41188	37441	41738
53.25	31769	33030	36856	31769	38668	44015	38086	42850	47345	41159	37417	41715
53.2583	31772	33045	36843	31772	38678	44028	38075	42823	47315	41130	37387	41691
53.2667	31773	33052	36833	31773	38691	44038	38067	42793	47282	41103	37356	41669
53.275	31773	33055	36822	31773	38706	44052	38065	42767	47252	41080	37320	41646
53.2833	31774	33054	36804	31774	38722	44064	38065	42739	47217	41054	37287	41625
53.2917	31762	33063	36782	31762	38736	44080	38063	42711	47180	41023	37248	41606
53.3	31755	33077	36762	31755	38754	44107	38062	42689	47143	40994	37223	41577
53.3083	31753	33085	36752	31753	38773	44129	38057	42667	47106	40965	37196	41551
53.3167	31748	33094	36739	31748	38789	44145	38050	42640	47071	40927	37163	41542
53.325	31743	33108	36725	31743	38802	44154	38043	42612	47037	40899	37139	41534
53.3333	31744	33122	36712	31744	38822	44163	38041	42584	47008	40879	37126	41526
53.3417	31746	33137	36695	31746	38843	44181	38039	42556	46979	40854	37112	41512
53.35	31747	33148	36674	31747	38868	44203	38032	42524	46950	40822	37086	41486
53.3583	31751	33155	36657	31751	38893	44228	38025	42496	46919	40782	37057	41462
53.3667	31745	33167	36643	31745	38914	44248	38022	42473	46887	40749	37040	41440
53.375	31741	33175	36629	31741	38939	44261	38016	42446	46856	40718	37021	41416
53.3833	31739	33176	36620	31739	38956	44276	38012	42418	46825	40697	36995	41404
53.3917	31738	33188	36607	31738	38976	44291	38012	42391	46794	40679	36960	41396
53.4	31739	33202	36589	31739	39001	44303	38004	42369	46761	40661	36928	41376
53.4083	31737	33211	36563	31737	39023	44316	37997	42341	46730	40646	36898	41359
53.4167	31735	33222	36542	31735	39040	44336	37991	42314	46706	40625	36877	41351
53.425	31732	33233	36525	31732	39058	44357	37988	42284	46677	40604	36863	41350
53.4333	31734	33252	36510	31734	39080	44384	37988	42255	46650	40584	36835	41344
53.4417	31739	33270	36499	31739	39096	44410	37982	42237	46617	40568	36803	41336
53.45	31741	33290	36490	31741	39112	44433	37978	42214	46588	40547	36772	41328
53.4583	31747	33305	36480	31747	39132	44448	37978	42195	46560	40530	36739	41325
53.4667	31755	33318	36468	31755	39156	44461	37975	42173	46534	40519	36714	41315
53.475	31756	33329	36450	31756	39183	44478	37972	42151	46510	40508	36686	41308
53.4833	31743	33344	36436	31743	39204	44503	37973	42133	46480	40492	36663	41296
53.4917	31738	33361	36422	31738	39230	44533	37972	42116	46451	40473	36646	41287
53.5	31740	33375	36407	31740	39259	44564	37969	42093	46423	40453	36629	41281
53.5083	31740	33393	36393	31740	39290	44593	37966	42071	46396	40428	36614	41270
53.5167	31747	33414	36381	31747	39321	44617	37962	42044	46367	40405	36594	41263
53.525	31752	33439	36371	31752	39346	44641	37961	42019	46342	40387	36573	41257
53.5333	31749	33459	36357	31749	39374	44665	37953	41998	46318	40368	36549	41247
53.5417	31739	33471	36337	31739	39404	44684	37952	41976	46294	40343	36531	41242
53.55	31733	33484	36316	31733	39429	44704	37954	41955	46273	40321	36521	41239
53.5583	31736	33499	36305	31736	39457	44733	37950	41938	46249	40307	36507	41241
53.5667	31738	33516	36294	31738	39484	44759	37943	41914	46226	40298	36491	41245
53.575	31738	33533	36288	31738	39512	44778	37939	41889	46203	40291	36470	41246
53.5833	31741	33555	36276	31741	39537	44804	37939	41867	46182	40281	36459	41240
53.5917	31747	33582	36263	31747	39561	44831	37941	41845	46163	40272	36440	41237
53.6	31749	33605	36241	31749	39590	44853	37941	41825	46142	40258	36415	41241
53.6083	31754	33620	36224	31754	39618	44877	37942	41813	46120	40248	36395	41246
53.6167	31765	33636	36215	31765	39647	44899	37949	41796	46100	40248	36384	41250
53.625	31773	33658	36212	31773	39672	44925	37956	41776	46079	40250	36371	41249
53.6333	31778	33682	36201	31778	39700	44960	37958	41763	46055	40250	36358	41251
53.6417	31780	33705	36189	31780	39732	44989	37959	41748	46033	40240	36340	41256
53.65	31778	33728	36177	31778	39758	45015	37962	41724	46011	40228	36320	41266
53.6583	31775	33755	36162	31775	39790	45042	37964	41702	45993	40220	36302	41272
53.6667	31778	33786	36147	31778	39820	45069	37965	41687	45978	40216	36293	41278
53.675	31781	33812	36131	31781	39851	45099	37963	41672	45959	40208	36277	41278
53.6833	31787	33834	36117	31787	39883	45126	37964	41655	45939	40205	36253	41277
53.6917	31791	33857	36105	31791	39919	45148	37964	41641	45925	40199	36236	41280
53.7	31792	33879	36095	31792	39955	45184	37969	41626	45913	40198	36222	41290
53.7083	31794	33902	36088	31794	39983	45218	37978	41609	45901	40202	36211	41297
53.7167	31800	33925	36080	31800	40013	45247	37984	41595	45888	40215	36211	41301
53.725	31810	33948	36073	31810	40044	45273	37989	41584	45877	40218	36216	41307
53.7333	31814	33967	36062	31814	40080	45303	37993	41576	45863	40213	36216	41310
53.7417	31815	33996	36054	31815	40116	45330	38001	41567	45854	40207	36209	41313
53.75	31816	34025	36048	31816	40154	45365	38010	41557	45846	40194	36201	41325
53.7583	31823	34052	36043	31823	40189	45401	38016	41542	45837	40189	36190	41338
53.7667	31828	34078	36036	31828	40219	45429	38019	41528	45828	40190	36179	41359
53.775	31833	34108	36031	31833	40246	45455	38023	41516	45820	40199	36163	41376
53.7833	31836	34143	36028	31836	40274	45485	38033	41507	45808	40207	36149	41387
53.7917	31842	34173	36024	31842	40310	45523	38035	41499	45797	40206	36134	41400
53.8	31842	34196	36013	31842	40344	45559	38031	41489	45786	40211	36116	41408
53.8083	31840	34218	36002	31840	40377	45595	38030	41478	45779	40222	36101	41419
53.8167	31840	34242	35996	31840	40409	45632	38034	41472	45774	40229	36096	41434
53.825	31839	34266	35990	31839	40447	45662	38043	41466	45768	40234	36093	41446
53.8333	31844	34296	35985	31844	40491	45689	38059	41459	45761	40243	36093	41460
53.8417	31853	34323	35981	31853	40527	45720	38071	41453	45751	40247	36093	41466
53.85	31861	34350	35973	31861	40560	45755	38082	41441	45746	40250	36091	41471
53.8583	31864	34382	35965	31864	40592	45787	38099	41439	45744	40249	36086	41478
53.8667	31872	34411	35962	31872	40623	45821	38109	41438	45740	40253	36079	41490
53.875	31878	34437	35963	31878	40654	45861	38108	41436	45744	40262	36069	41508
53.8833	31883	34466	35961	31883	40688	45901	38109	41433	45748	40270	36060	41532
53.8917	31890	34497	35955	31890	40729	45938	38120	41430	45747	40275	36053	41559
53.9	31896	34531	35948	31896	40768	45969	38139	41419	45750	40279	36058	41581
53.9083	31901	34566	35945	31901	40807	46000	38157	41412	45744	40289	36062	41596
53.9167	31906	34602	35944	31906	40842	46035	38173	41413	45732	40301	36059	41604
53.925	31914	34634	35948	31914	40872	46073	38188	41416	45729	40309	36059	41616
53.9333	31923	34667	35950	31923	40911	46112	38201	41424	45735	40312	36057	41631
53.9417	31931	34700	35951	31931	40953	46152	38210	41427	45741	40314	36060	41650
53.95	31941	34739	35944	31941	40993	46195	38220	41427	45743	40328	36059	41662
53.9583	31951	34776	35935	31951	41027	46239	38234	41421	45749	40340	36057	41680
53.9667	31954	34815	35934	31954	41064	46281	38248	41417	45759	40349	36053	41705
53.975	31955	34849	35937	31955	41110	46309	38254	41418	45763	40349	36047	41731
53.9833	31964	34873	35937	31964	41154	46335	38265	41413	45765	40348	36045	41756
53.9917	31978	34895	35934	31978	41198	46373	38282	41411	45771	40348	36050	41779
54	31989	34927	35932	31989	41234	46411	38300	41413	45775	40359	36058	41803
54.0083	31998	34961	35931	31998	41269	46448	38318	41421	45779	40372	36061	41830
54.0167	32009	34995	35927	32009	41315	46485	38335	41423	45784	40381	36067	41865
54.025	32023	35030	35928	32023	41362	46523	38353	41424	45791	40387	36078	41895
54.0333	32034	35067	35938	32034	41401	46565	38376	41431	45799	40397	36082	41911
54.0417	32040	35102	35941	32040	41439	46603	38392	41441	45814	40408	36079	41917
54.05	32051	35140	35940	32051	41480	46648	38406	41451	45823	40418	36074	41925
54.0583	32060	35177	35945	32060	41519	46689	38414	41459	45839	40415	36071	41947
54.0667	32068	35207	35952	32068	41561	46726	38424	41471	45859	40416	36062	41973
54.075	32082	35235	35954	32082	41606	46764	38443	41477	45871	40429	36059	41994
54.0833	32099	35264	35953	32099	41651	46801	38468	41482	45885	40435	36063	42010
54.0917	32111	35299	35957	32111	41687	46844	38490	41494	45901	40443	36073	42032
54.1	32121	35332	35965	32121	41732	46890	38513	41507	45919	40459	36079	42050
54.1083	32130	35358	35977	32130	41781	46927	38537	41520	45940	40480	36078	42072
54.1167	32141	35394	35987	32141	41833	46970	38566	41531	45959	40500	36078	42101
54.125	32161	35433	35987	32161	41886	47015	38590	41541	45980	40514	36076	42127
54.1333	32174	35470	35986	32174	41930	47058	38611	41549	46000	40518	36074	42155
54.1417	32189	35511	35987	32189	41966	47102	38635	41561	46014	40524	36072	42170
54.15	32204	35553	35985	32204	42000	47145	38655	41579	46033	40541	36070	42175
54.1583	32218	35590	35988	32218	42043	47194	38677	41594	46053	40557	36061	42184
54.1667	32235	35617	35993	32235	42091	47247	38703	41613	46078	40570	36051	42207
54.175	32251	35647	36003	32251	42135	47300	38730	41631	46101	40588	36049	42235
54.1833	32279	35681	36016	32279	42183	47343	38762	41644	46127	40609	36048	42262
54.1917	32298	35713	36030	32298	42238	47380	38792	41655	46154	40630	36042	42289
54.2	32316	35749	36034	32316	42285	47421	38812	41674	46179	40644	36035	42314
54.2083	32334	35791	36036	32334	42320	47468	38830	41695	46209	40642	36028	42335
54.2167	32348	35829	36047	32348	42360	47519	38849	41711	46241	40647	36032	42364
54.225	32365	35868	36064	32365	42407	47566	38872	41726	46275	40658	36033	42392
54.2333	32382	35903	36073	32382	42448	47607	38903	41745	46309	40668	36038	42414
54.2417	32404	35942	36085	32404	42489	47643	38939	41773	46339	40676	36046	42436
54.25	32426	35981	36101	32426	42535	47685	38972	41803	46369	40686	36053	42461
54.2583	32457	36017	36113	32457	42582	47732	39001	41829	46396	40702	36065	42477
54.2667	32481	36053	36122	32481	42626	47778	39028	41853	46422	40710	36076	42487
54.275	32496	36087	36138	32496	42674	47826	39058	41879	46449	40717	36081	42499
54.2833	32517	36123	36150	32517	42730	47879	39094	41909	46476	40728	36086	42511
54.2917	32538	36157	36158	32538	42786	47928	39129	41935	46511	40738	36088	42527
54.3	32563	36186	36172	32563	42843	47978	39163	41958	46549	40742	36084	42545
54.3083	32596	36220	36185	32596	42897	48020	39194	41986	46581	40741	36075	42571
54.3167	32624	36258	36195	32624	42949	48061	39226	42017	46616	40739	36066	42594
54.325	32647	36298	36204	32647	42993	48110	39262	42053	46652	40745	36067	42608
54.3333	32675	36335	36214	32675	43043	48157	39297	42090	46688	40762	36070	42615
54.3417	32708	36366	36230	32708	43100	48200	39337	42125	46726	40782	36069	42633
54.35	32747	36397	36244	32747	43144	48242	39381	42156	46762	40794	36065	42654
54.3583	32782	36434	36254	32782	43188	48289	39424	42191	46795	40803	36060	42680
54.3667	32807	36469	36264	32807	43237	48344	39461	42229	46834	40810	36054	42707
54.375	32832	36509	36272	32832	43291	48401	39497	42264	46876	40820	36046	42730
54.3833	32853	36553	36286	32853	43349	48457	39531	42299	46919	40832	36043	42754
54.3917	32885	36594	36304	32885	43402	48508	39570	42336	46965	40843	36036	42772
54.4	32922	36631	36321	32922	43452	48560	39615	42379	47011	40855	36033	42790
54.4083	32960	36662	36336	32960	43504	48608	39664	42420	47058	40863	36032	42807
54.4167	32997	36689	36353	32997	43555	48653	39707	42455	47106	40868	36024	42827
54.425	33033	36721	36370	33033	43605	48703	39751	42493	47150	40874	36019	42850
54.4333	33069	36759	36381	33069	43656	48751	39798	42537	47194	40888	36015	42868
54.4417	33107	36797	36395	33107	43709	48798	39846	42580	47248	40898	36019	42877
54.45	33146	36832	36416	33146	43759	48851	39895	42622	47300	40910	36019	42891
54.4583	33187	36862	36437	33187	43811	48905	39943	42664	47354	40918	36020	42904
54.4667	33231	36889	36455	33231	43871	48959	39987	42706	47406	40916	36024	42909
54.475	33274	36917	36470	33274	43926	48999	40036	42749	47459	40915	36025	42923
54.4833	33320	36944	36490	33320	43973	49043	40082	42790	47519	40921	36022	42944
54.4917	33364	36975	36511	33364	44023	49088	40128	42838	47575	40933	36021	42957
54.5	33408	37011	36532	33408	44068	49134	40175	42894	47631	40949	36021	42969
54.5083	33461	37043	36558	33461	44116	49178	40226	42953	47688	40960	36020	42987
54.5167	33508	37075	36582	33508	44172	49228	40276	43004	47746	40958	36021	43009
54.525	33551	37110	36599	33551	44236	49281	40328	43051	47808	40961	36018	43034
54.5333	33600	37148	36616	33600	44291	49335	40379	43107	47876	40966	36015	43052
54.5417	33644	37188	36633	33644	44345	49385	40436	43161	47941	40966	36014	43075
54.55	33686	37224	36654	33686	44393	49435	40492	43214	48003	40964	36018	43095
54.5583	33737	37257	36682	33737	44444	49480	40542	43264	48064	40961	36019	43110
54.5667	33793	37289	36709	33793	44500	49531	40597	43324	48129	40964	36014	43126
54.575	33841	37319	36729	33841	44559	49583	40657	43391	48195	40968	36011	43134
54.5833	33886	37353	36752	33886	44610	49631	40717	43455	48262	40973	36007	43141
54.5917	33932	37387	36775	33932	44665	49678	40778	43516	48335	40975	36002	43153
54.6	33987	37417	36790	33987	44722	49726	40836	43571	48410	40978	35998	43163
54.6083	34042	37438	36812	34042	44776	49774	40891	43629	48484	40979	35994	43179
54.6167	34101	37464	36837	34101	44831	49828	40953	43694	48555	40978	35985	43198
54.625	34167	37503	36862	34167	44889	49880	41015	43761	48628	40980	35976	43211
54.6333	34222	37541	36891	34222	44948	49925	41078	43832	48700	40981	35970	43218
54.6417	34275	37573	36919	34275	45002	49962	41139	43904	48773	40983	35964	43219
54.65	34334	37596	36941	34334	45053	50003	41206	43968	48847	40990	35959	43223
54.6583	34394	37615	36964	34394	45102	50047	41271	44031	48929	40993	35949	43240
54.6667	34455	37640	36991	34455	45152	50097	41336	44097	49011	40993	35937	43251
54.675	34515	37663	37016	34515	45206	50147	41402	44165	49093	40992	35931	43256
54.6833	34571	37689	37045	34571	45263	50197	41471	44238	49171	40990	35927	43263
54.6917	34635	37722	37075	34635	45325	50247	41540	44315	49249	40990	35923	43281
54.7	34697	37757	37102	34697	45377	50292	41605	44388	49334	40987	35921	43296
54.7083	34767	37787	37125	34767	45422	50336	41670	44456	49418	40981	35919	43296
54.7167	34834	37816	37157	34834	45470	50383	41740	44524	49501	40968	35913	43303
54.725	34889	37844	37184	34889	45530	50427	41816	44600	49587	40954	35909	43316
54.7333	34951	37862	37209	34951	45588	50464	41896	44680	49672	40946	35908	43329
54.7417	35026	37879	37229	35026	45644	50504	41974	44762	49757	40938	35904	43332
54.75	35091	37894	37255	35091	45696	50554	42045	44845	49845	40930	35894	43325
54.7583	35160	37920	37280	35160	45749	50605	42117	44925	49932	40934	35887	43325
54.7667	35235	37947	37311	35235	45800	50652	42187	45005	50022	40940	35874	43327
54.775	35305	37972	37341	35305	45846	50694	42258	45086	50121	40937	35862	43332
54.7833	35372	38001	37371	35372	45896	50736	42335	45171	50215	40925	35848	43336
54.7917	35433	38032	37397	35433	45947	50779	42414	45253	50303	40919	35830	43343
54.8	35497	38061	37422	35497	46006	50829	42491	45331	50399	40921	35808	43350
54.8083	35570	38088	37445	35570	46063	50877	42577	45414	50497	40917	35794	43351
54.8167	35642	38111	37469	35642	46120	50917	42659	45501	50595	40914	35791	43356
54.825	35715	38129	37496	35715	46173	50959	42743	45584	50698	40902	35794	43365
54.8333	35784	38146	37524	35784	46226	51006	42822	45667	50802	40884	35786	43376
54.8417	35853	38167	37547	35853	46275	51047	42902	45752	50902	40881	35779	43381
54.85	35927	38189	37577	35927	46328	51086	42986	45843	51003	40878	35776	43379
54.8583	36003	38206	37607	36003	46379	51121	43068	45935	51102	40877	35772	43388
54.8667	36079	38217	37636	36079	46434	51158	43150	46029	51206	40869	35765	43402
54.875	36160	38233	37662	36160	46489	51196	43234	46125	51312	40868	35759	43408
54.8833	36235	38251	37694	36235	46541	51239	43321	46211	51412	40868	35761	43405
54.8917	36308	38264	37729	36308	46592	51281	43409	46297	51516	40869	35752	43399
54.9	36384	38283	37763	36384	46646	51323	43495	46390	51622	40866	35732	43403
54.9083	36460	38304	37794	36460	46697	51363	43584	46483	51726	40859	35720	43404
54.9167	36542	38328	37820	36542	46746	51406	43674	46583	51828	40854	35706	43405
54.925	36627	38349	37845	36627	46791	51443	43762	46678	51936	40847	35693	43404
54.9333	36714	38367	37873	36714	46838	51473	43853	46773	52042	40839	35681	43400
54.9417	36802	38384	37904	36802	46890	51512	43943	46873	52147	40823	35661	43395
54.95	36886	38397	37938	36886	46947	51563	44033	46973	52258	40807	35635	43398
54.9583	36965	38406	37968	36965	47000	51606	44124	47073	52374	40805	35615	43399
54.9667	37041	38414	37996	37041	47058	51643	44215	47176	52487	40806	35604	43404
54.975	37121	38431	38028	37121	47115	51672	44315	47277	52604	40807	35595	43410
54.9833	37208	38448	38060	37208	47164	51702	44413	47380	52720	40804	35583	43410
54.9917	37287	38461	38090	37287	47208	51740	44506	47483	52833	40793	35564	43415
55	37366	38473	38111	37366	47256	51777	44596	47587	52945	40782	35549	43419
55.0083	37449	38485	38138	37449	47305	51814	44687	47683	53059	40780	35530	43418
55.0167	37539	38500	38164	37539	47350	51851	44785	47783	53175	40781	35517	43412
55.025	37633	38518	38187	37633	47398	51887	44883	47885	53289	40787	35503	43409
55.0333	37720	38533	38214	37720	47443	51924	44982	47994	53405	40785	35485	43398
55.0417	37810	38540	38242	37810	47492	51964	45085	48103	53522	40775	35472	43389
55.05	37904	38542	38273	37904	47543	51999	45193	48213	53643	40768	35456	43377
55.0583	37991	38543	38309	37991	47591	52027	45298	48324	53771	40757	35446	43373
55.0667	38074	38554	38340	38074	47640	52058	45399	48432	53897	40748	35436	43369
55.075	38154	38575	38369	38154	47686	52090	45494	48537	54025	40733	35419	43374
55.0833	38231	38588	38397	38231	47737	52117	45593	48641	54147	40718	35406	43380
55.0917	38306	38600	38427	38306	47784	52146	45694	48749	54262	40707	35398	43382
55.1	38386	38604	38452	38386	47832	52178	45797	48860	54375	40701	35391	43381
55.1083	38467	38609	38474	38467	47879	52207	45903	48970	54497	40694	35387	43381
55.1167	38550	38616	38496	38550	47929	52240	46003	49079	54624	40687	35386	43376
55.125	38636	38629	38517	38636	47977	52269	46100	49190	54751	40680	35378	43366
55.1333	38719	38638	38535	38719	48021	52298	46195	49301	54883	40666	35366	43350
55.1417	38801	38651	38559	38801	48066	52324	46292	49411	55006	40657	35360	43340
55.15	38881	38663	38587	38881	48114	52352	46393	49528	55125	40660	35348	43340
55.1583	38964	38670	38618	38964	48164	52388	46495	49642	55250	40657	35337	43336
55.1667	39049	38674	38642	39049	48203	52424	46594	49751	55373	40645	35329	43329
55.175	39142	38677	38671	39142	48238	52459	46696	49857	55499	40633	35316	43327
55.1833	39239	38677	38701	39239	48280	52487	46803	49965	55630	40621	35298	43323
55.1917	39333	38678	38732	39333	48319	52507	46912	50080	55761	40604	35280	43310
55.2	39430	38677	38764	39430	48363	52535	47023	50195	55885	40589	35268	43299
55.2083	39542	38679	38790	39542	48413	52564	47136	50309	56005	40572	35254	43286
55.2167	39663	38685	38816	39663	48460	52590	47250	50425	56125	40551	35235	43279
55.225	39787	38695	38840	39787	48503	52617	47358	50541	56249	40535	35216	43278
55.2333	39912	38706	38862	39912	48545	52643	47470	50653	56382	40523	35197	43280
55.2417	40039	38713	38885	40039	48582	52666	47582	50761	56512	40517	35179	43278
55.25	40181	38716	38903	40181	48622	52692	47692	50870	56646	40506	35153	43273
55.2583	40321	38714	38925	40321	48660	52719	47799	50985	56778	40487	35129	43271
55.2667	40463	38717	38948	40463	48706	52749	47907	51106	56906	40480	35104	43267
55.275	40609	38724	38968	40609	48752	52781	48021	51227	57033	40481	35085	43255
55.2833	40762	38727	38988	40762	48798	52811	48132	51343	57165	40481	35072	43242
55.2917	40914	38726	39012	40914	48844	52838	48241	51455	57297	40475	35065	43232
55.3	41064	38726	39034	41064	48887	52856	48355	51568	57422	40459	35059	43227
55.3083	41208	38727	39056	41208	48923	52867	48470	51680	57549	40448	35042	43207
55.3167	41350	38730	39076	41350	48958	52883	48581	51793	57676	40436	35024	43184
55.325	41494	38737	39094	41494	48992	52903	48689	51910	57801	40435	35011	43171
55.3333	41637	38745	39115	41637	49022	52926	48801	52029	57924	40432	35001	43167
55.3417	41771	38752	39138	41771	49055	52953	48914	52144	58049	40418	34987	43158
55.35	41901	38755	39157	41901	49096	52988	49024	52253	58175	40401	34964	43147
55.3583	42027	38757	39175	42027	49139	53018	49134	52361	58296	40384	34941	43136
55.3667	42148	38759	39190	42148	49184	53041	49241	52469	58417	40367	34917	43128
55.375	42265	38756	39206	42265	49230	53061	49349	52583	58542	40357	34897	43125
55.3833	42379	38752	39223	42379	49269	53078	49452	52696	58672	40351	34879	43121
55.3917	42487	38751	39244	42487	49302	53096	49559	52819	58802	40344	34869	43113
55.4	42588	38751	39267	42588	49334	53114	49669	52936	58929	40332	34862	43103
55.4083	42693	38753	39284	42693	49373	53139	49779	53043	59056	40315	34856	43091
55.4167	42804	38762	39299	42804	49416	53167	49892	53147	59184	40296	34839	43075
55.425	42916	38766	39308	42916	49466	53188	50004	53250	59311	40279	34818	43058
55.4333	43022	38768	39322	43022	49508	53200	50118	53357	59434	40268	34802	43043
55.4417	43134	38769	39335	43134	49540	53212	50232	53465	59550	40266	34790	43024
55.45	43239	38767	39348	43239	49563	53227	50339	53578	59668	40264	34783	43005
55.4583	43336	38762	39364	43336	49589	53241	50445	53692	59790	40263	34767	42990
55.4667	43432	38756	39379	43432	49621	53254	50552	53812	59914	40256	34750	42977
55.475	43537	38748	39393	43537	49653	53275	50658	53931	60030	40247	34725	42968
55.4833	43653	38740	39406	43653	49689	53292	50768	54040	60148	40235	34699	42954
55.4917	43760	38735	39418	43760	49724	53300	50881	54145	60269	40217	34677	42934
55.5	43863	38740	39428	43863	49765	53311	50992	54246	60385	40202	34659	42913
55.5083	43973	38744	39433	43973	49806	53324	51101	54347	60499	40185	34645	42905
55.5167	44083	38745	39441	44083	49836	53334	51203	54451	60614	40161	34632	42898
55.525	44191	38744	39452	44191	49872	53348	51309	54559	60735	40147	34612	42882
55.5333	44296	38740	39470	44296	49911	53368	51419	54665	60848	40140	34592	42865
55.5417	44397	38734	39489	44397	49949	53390	51532	54767	60959	40131	34572	42844
55.55	44498	38731	39501	44498	49981	53407	51645	54869	61070	40121	34558	42821
55.5583	44600	38726	39512	44600	50013	53425	51746	54975	61178	40102	34534	42802
55.5667	44702	38722	39524	44702	50049	53437	51843	55079	61285	40085	34514	42783
55.575	44803	38724	39531	44803	50079	53443	51949	55179	61394	40070	34497	42765
55.5833	44903	38729	39538	44903	50104	53453	52053	55278	61502	40052	34485	42746
55.5917	45000	38728	39544	45000	50122	53465	52154	55378	61608	40031	34474	42723
55.6	45097	38727	39544	45097	50149	53481	52258	55480	61717	40011	34458	42702
55.6083	45190	38729	39548	45190	50176	53494	52369	55582	61828	40000	34436	42689
55.6167	45285	38717	39550	45285	50204	53498	52483	55685	61937	40003	34417	42682
55.625	45376	38700	39553	45376	50231	53501	52590	55782	62047	39999	34385	42666
55.6333	45467	38689	39559	45467	50260	53504	52697	55875	62147	39988	34354	42650
55.6417	45557	38680	39567	45557	50290	53513	52801	55966	62245	39970	34324	42634
55.65	45637	38675	39581	45637	50321	53520	52899	56061	62344	39944	34301	42615
55.6583	45717	38673	39592	45717	50348	53528	52997	56152	62446	39925	34282	42595
55.6667	45797	38673	39599	45797	50368	53533	53099	56245	62548	39906	34258	42571
55.675	45875	38677	39597	45875	50388	53542	53202	56336	62648	39878	34238	42546
55.6833	45948	38680	39588	45948	50414	53550	53304	56429	62738	39856	34221	42525
55.6917	46024	38681	39588	46024	50447	53558	53405	56525	62828	39846	34200	42498
55.7	46104	38675	39595	46104	50483	53564	53504	56620	62917	39835	34175	42481
55.7083	46183	38663	39599	46183	50511	53569	53595	56712	63007	39821	34161	42465
55.7167	46255	38649	39608	46255	50528	53575	53687	56801	63097	39795	34138	42452
55.725	46333	38646	39617	46333	50543	53579	53783	56888	63194	39768	34114	42440
55.7333	46403	38639	39622	46403	50565	53583	53883	56970	63288	39752	34089	42425
55.7417	46470	38631	39626	46470	50585	53586	53983	57051	63381	39738	34061	42410
55.75	46540	38626	39625	46540	50607	53587	54084	57132	63474	39727	34038	42388
55.7583	46616	38623	39625	46616	50633	53583	54186	57215	63559	39720	34013	42355
55.7667	46682	38613	39621	46682	50657	53579	54283	57298	63640	39716	33982	42327
55.775	46739	38603	39621	46739	50685	53575	54376	57378	63720	39704	33953	42303
55.7833	46793	38597	39618	46793	50708	53572	54475	57460	63805	39680	33926	42273
55.7917	46851	38592	39613	46851	50724	53577	54572	57542	63884	39653	33899	42238
55.8	46910	38598	39611	46910	50738	53584	54669	57624	63952	39625	33879	42204
55.8083	46966	38593	39613	46966	50745	53582	54762	57699	64021	39597	33857	42172
55.8167	47020	38581	39618	47020	50753	53578	54853	57767	64093	39575	33828	42154
55.825	47078	38566	39616	47078	50769	53581	54946	57834	64163	39561	33805	42137
55.8333	47131	38551	39608	47131	50785	53584	55039	57898	64232	39547	33775	42112
55.8417	47187	38544	39602	47187	50798	53582	55128	57968	64298	39523	33742	42083
55.85	47243	38539	39595	47243	50804	53575	55219	58041	64364	39488	33712	42055
55.8583	47300	38537	39583	47300	50815	53567	55302	58118	64432	39455	33683	42028
55.8667	47357	38532	39573	47357	50833	53564	55383	58190	64503	39437	33653	42003
55.875	47402	38517	39561	47402	50851	53558	55471	58260	64574	39427	33631	41975
55.8833	47447	38498	39556	47447	50867	53548	55565	58331	64635	39407	33610	41950
55.8917	47503	38489	39560	47503	50877	53540	55656	58400	64694	39383	33588	41924
55.9	47555	38489	39558	47555	50893	53535	55746	58468	64752	39351	33569	41908
55.9083	47611	38487	39556	47611	50899	53529	55835	58538	64806	39319	33549	41890
55.9167	47665	38482	39550	47665	50904	53522	55918	58601	64857	39288	33525	41869
55.925	47712	38475	39540	47712	50912	53518	56004	58657	64907	39259	33494	41841
55.9333	47764	38468	39530	47764	50917	53519	56094	58708	64959	39235	33464	41811
55.9417	47816	38459	39518	47816	50927	53514	56177	58765	65012	39207	33431	41779
55.95	47860	38455	39506	47860	50937	53502	56259	58828	65061	39181	33394	41743
55.9583	47906	38457	39497	47906	50951	53495	56343	58886	65105	39160	33347	41710
55.9667	47955	38447	39488	47955	50965	53487	56422	58945	65155	39134	33302	41690
55.975	48003	38432	39480	48003	50970	53477	56498	59001	65201	39105	33269	41663
55.9833	48048	38426	39466	48048	50968	53463	56573	59056	65240	39085	33232	41636
55.9917	48098	38420	39450	48098	50971	53453	56651	59102	65278	39059	33205	41612
56	48142	38408	39439	48142	50975	53436	56734	59144	65318	39035	33187	41588
56.0083	48184	38397	39429	48184	50982	53417	56814	59189	65353	39013	33166	41554
56.0167	48227	38388	39417	48227	50991	53404	56894	59235	65392	38986	33139	41527
56.025	48276	38383	39406	48276	50990	53394	56971	59282	65434	38954	33102	41502
56.0333	48323	38379	39401	48323	50985	53386	57050	59330	65467	38926	33063	41472
56.0417	48370	38372	39392	48370	50978	53382	57124	59379	65491	38898	33024	41439
56.05	48419	38359	39373	48419	50977	53376	57200	59424	65517	38872	32993	41407
56.0583	48471	38346	39356	48471	50985	53366	57277	59466	65554	38845	32969	41375
56.0667	48513	38335	39343	48513	50991	53357	57353	59511	65595	38812	32944	41345
56.075	48551	38329	39326	48551	50991	53344	57427	59554	65626	38787	32911	41317
56.0833	48597	38319	39314	48597	50990	53329	57502	59589	65653	38762	32881	41283
56.0917	48644	38313	39301	48644	50986	53315	57575	59622	65677	38737	32851	41248
56.1	48684	38307	39285	48684	50985	53295	57647	59658	65699	38703	32821	41210
56.1083	48720	38299	39271	48720	50980	53279	57717	59699	65720	38667	32792	41172
56.1167	48759	38293	39253	48759	50982	53271	57787	59743	65742	38628	32764	41138
56.125	48800	38290	39235	48800	50984	53261	57855	59783	65762	38589	32738	41104
56.1333	48848	38287	39222	48848	50979	53254	57923	59816	65779	38552	32707	41071
56.1417	48894	38282	39208	48894	50971	53243	57990	59848	65795	38520	32677	41041
56.15	48937	38272	39192	48937	50965	53231	58056	59878	65810	38488	32644	41011
56.1583	48975	38260	39171	48975	50963	53223	58122	59903	65821	38464	32608	40971
56.1667	49015	38255	39161	49015	50962	53216	58189	59928	65832	38440	32581	40935
56.175	49055	38250	39148	49055	50954	53206	58259	59956	65837	38406	32547	40901
56.1833	49090	38242	39127	49090	50948	53197	58325	59980	65844	38374	32513	40864
56.1917	49122	38238	39107	49122	50942	53192	58382	60009	65853	38345	32472	40827
56.2	49151	38241	39094	49151	50937	53185	58441	60038	65858	38314	32428	40789
56.2083	49181	38234	39077	49181	50933	53172	58503	60066	65862	38278	32391	40753
56.2167	49216	38223	39060	49216	50927	53155	58567	60089	65869	38237	32356	40714
56.225	49256	38212	39040	49256	50922	53135	58631	60113	65873	38191	32329	40679
56.2333	49298	38207	39017	49298	50917	53116	58691	60137	65880	38149	32297	40647
56.2417	49339	38201	39000	49339	50911	53100	58755	60160	65889	38114	32269	40612
56.25	49378	38194	38983	49378	50900	53089	58818	60180	65893	38078	32239	40579
56.2583	49411	38195	38962	49411	50888	53082	58880	60202	65892	38042	32202	40550
56.2667	49441	38190	38942	49441	50874	53072	58939	60219	65887	38001	32160	40514
56.275	49468	38177	38926	49468	50867	53056	58998	60236	65884	37963	32117	40475
56.2833	49498	38165	38907	49498	50863	53040	59058	60254	65876	37929	32074	40437
56.2917	49535	38162	38887	49535	50859	53026	59119	60271	65869	37898	32040	40403
56.3	49572	38165	38864	49572	50853	53011	59180	60286	65864	37871	32011	40368
56.3083	49616	38161	38846	49616	50845	53000	59236	60303	65857	37838	31980	40331
56.3167	49657	38156	38825	49657	50833	52993	59293	60322	65843	37801	31943	40298
56.325	49690	38151	38803	49690	50817	52986	59353	60334	65828	37761	31897	40262
56.3333	49717	38143	38782	49717	50803	52974	59416	60345	65815	37720	31857	40229
56.3417	49742	38135	38760	49742	50789	52964	59474	60356	65805	37681	31811	40189
56.35	49775	38135	38739	49775	50780	52953	59528	60369	65794	37640	31775	40144
56.3583	49814	38142	38719	49814	50780	52951	59585	60376	65778	37594	31734	40106
56.3667	49847	38150	38701	49847	50777	52949	59641	60381	65758	37552	31697	40082
56.375	49877	38155	38683	49877	50770	52938	59692	60385	65743	37516	31665	40055
56.3833	49911	38155	38659	49911	50763	52930	59743	60390	65725	37478	31629	40014
56.3917	49947	38162	38633	49947	50751	52923	59791	60393	65707	37434	31597	39979
56.4	49976	38172	38607	49976	50747	52918	59840	60398	65686	37394	31565	39956
56.4083	50011	38175	38581	50011	50750	52915	59893	60402	65663	37358	31534	39930
56.4167	50047	38170	38558	50047	50747	52910	59942	60408	65639	37312	31504	39898
56.425	50081	38160	38535	50081	50741	52904	59994	60417	65621	37263	31469	39866
56.4333	50109	38149	38514	50109	50729	52901	60044	60431	65603	37217	31440	39832
56.4417	50135	38147	38499	50135	50724	52898	60092	60432	65579	37172	31408	39800
56.45	50159	38151	38481	50159	50719	52895	60140	60427	65553	37125	31373	39768
56.4583	50188	38157	38458	50188	50709	52897	60187	60426	65528	37087	31340	39733
56.4667	50216	38160	38431	50216	50701	52897	60232	60428	65502	37053	31304	39691
56.475	50245	38156	38404	50245	50697	52894	60277	60426	65473	37018	31261	39655
56.4833	50271	38153	38380	50271	50688	52891	60325	60422	65448	36980	31215	39627
56.4917	50297	38153	38358	50297	50683	52893	60377	60421	65421	36941	31170	39598
56.5	50331	38159	38330	50331	50677	52890	60424	60423	65395	36898	31135	39572
56.5083	50363	38169	38310	50363	50663	52886	60469	60427	65373	36845	31098	39540
56.5167	50399	38174	38296	50399	50647	52890	60514	60427	65350	36793	31063	39510
56.525	50430	38183	38278	50430	50636	52899	60560	60419	65325	36755	31030	39471
56.5333	50450	38192	38260	50450	50626	52899	60603	60410	65293	36724	30996	39438
56.5417	50475	38197	38237	50475	50624	52904	60638	60404	65253	36679	30964	39412
56.55	50508	38200	38209	50508	50624	52905	60669	60399	65217	36621	30925	39388
56.5583	50534	38207	38182	50534	50620	52908	60705	60394	65181	36562	30887	39363
56.5667	50557	38220	38161	50557	50618	52908	60743	60391	65146	36507	30854	39340
56.575	50588	38232	38136	50588	50619	52910	60779	60384	65105	36465	30826	39318
56.5833	50626	38243	38115	50626	50616	52922	60819	60366	65069	36431	30787	39283
56.5917	50653	38256	38094	50653	50617	52938	60863	60353	65033	36402	30749	39250
56.6	50677	38261	38070	50677	50613	52948	60909	60349	64998	36369	30712	39217
56.6083	50702	38268	38048	50702	50610	52957	60953	60350	64959	36322	30679	39185
56.6167	50731	38286	38024	50731	50609	52970	60982	60348	64922	36265	30645	39152
56.625	50764	38306	37999	50764	50613	52983	61011	60344	64889	36211	30608	39123
[truncated: 1,605 more rows]
