# Supplementary material for: Effect of process parameters on woody biomass fractionation in a methanol/water mixture in a semi-flow reactor
Source: Royal Society of Chemistry journal article supplement (doi:10.1039/d4ya00261j), 2024-01-01
Supplement: d4ya00261j6.xlsx [file d4ya00261j6.xlsx]

## Sheet: GC-MS
Total ion chromatograms from gas chromatography-mass spectrometry of the soluble fractions obtained from Japanese cedar wood after treatment with methanol/water (90/10, v/v) at various pressures.
R.T (min)	Intensity
	10 MPa	20 MPa	30 MPa
10	2.37	1.63	2.09
10.005	2.26	1.58	2.1
10.01	2.23	1.62	2.13
10.015	2.24	1.63	2.13
10.02	2.21	1.63	2.09
10.025	2.18	1.63	2.1
10.03	2.19	1.66	2.1
10.035	2.21	1.68	2.05
10.04	2.2	1.67	2.02
10.045	2.21	1.64	2.08
10.05	2.29	1.59	2.11
10.055	2.42	1.57	2.11
10.06	2.55	1.56	2.14
10.065	2.67	1.55	2.22
10.07	2.82	1.58	2.24
10.075	3	1.64	2.27
10.08	3.13	1.75	2.33
10.085	3.15	1.86	2.37
10.09	3.17	1.88	2.37
10.095	3.08	1.9	2.43
10.1	2.95	1.94	2.48
10.105	2.87	1.96	2.44
10.11	2.73	1.97	2.33
10.115	2.56	1.91	2.26
10.12	2.46	1.87	2.24
10.125	2.42	1.85	2.22
10.13	2.33	1.76	2.18
10.135	2.28	1.66	2.14
10.14	2.27	1.62	2.11
10.145	2.29	1.57	2.07
10.15	2.26	1.51	2.03
10.155	2.23	1.43	2.07
10.16	2.24	1.45	2.11
10.165	2.26	1.49	2.07
10.17	2.24	1.48	2.02
10.175	2.25	1.45	2.05
10.18	2.34	1.48	2.04
10.185	2.34	1.53	1.99
10.19	2.39	1.47	2.05
10.195	2.46	1.46	2.11
10.2	2.49	1.5	2.11
10.205	2.48	1.53	2.14
10.21	2.45	1.54	2.17
10.215	2.48	1.56	2.19
10.22	2.48	1.52	2.2
10.225	2.48	1.53	2.21
10.23	2.44	1.6	2.18
10.235	2.38	1.61	2.16
10.24	2.38	1.61	2.18
10.245	2.42	1.63	2.16
10.25	2.41	1.57	2.14
10.255	2.38	1.52	2.14
10.26	2.35	1.58	2.16
10.265	2.31	1.58	2.13
10.27	2.29	1.54	2.08
10.275	2.28	1.5	2.12
10.28	2.28	1.55	2.12
10.285	2.29	1.54	2.11
10.29	2.27	1.51	2.13
10.295	2.27	1.47	2.11
10.3	2.26	1.46	2.05
10.305	2.24	1.46	2.05
10.31	2.21	1.44	2.04
10.315	2.24	1.44	2.08
10.32	2.25	1.46	2
10.325	2.23	1.44	1.96
10.33	2.25	1.47	1.95
10.335	2.27	1.48	2.01
10.34	2.22	1.45	2.06
10.345	2.18	1.41	2.07
10.35	2.18	1.41	2.08
10.355	2.3	1.38	2.08
10.36	2.36	1.36	2.01
10.365	2.29	1.41	1.97
10.37	2.22	1.4	2
10.375	2.21	1.34	2.03
10.38	2.15	1.37	1.97
10.385	2.18	1.43	1.95
10.39	2.17	1.46	1.96
10.395	2.17	1.47	1.99
10.4	2.19	1.43	1.97
10.405	2.19	1.4	1.95
10.41	2.19	1.43	2.02
10.415	2.27	1.43	2.07
10.42	2.3	1.44	2.14
10.425	2.21	1.46	2.11
10.43	2.1	1.5	2.05
10.435	2.22	1.53	2.02
10.44	2.25	1.5	2.11
10.445	2.29	1.46	2.15
10.45	2.26	1.45	2.07
10.455	2.23	1.42	1.98
10.46	2.18	1.49	1.98
10.465	2.22	1.53	1.93
10.47	2.2	1.52	1.96
10.475	2.16	1.49	1.96
10.48	2.21	1.5	1.98
10.485	2.24	1.51	1.99
10.49	2.16	1.47	1.98
10.495	2.13	1.42	1.99
10.5	2.09	1.4	2
10.505	2.15	1.43	1.93
10.51	2.17	1.51	1.94
10.515	2.15	1.48	1.93
10.52	2.08	1.47	1.9
10.525	2.1	1.49	1.96
10.53	2.1	1.44	2
10.535	2.17	1.4	1.98
10.54	2.19	1.39	1.99
10.545	2.17	1.38	2
10.55	2.15	1.43	2.02
10.555	2.16	1.46	2.07
10.56	2.17	1.43	2.03
10.565	2.18	1.46	2.02
10.57	2.21	1.45	2.03
10.575	2.28	1.48	2.05
10.58	2.38	1.46	2.03
10.585	2.48	1.42	2.08
10.59	2.65	1.46	2.22
10.595	2.87	1.56	2.3
10.6	3.08	1.62	2.33
10.605	3.18	1.66	2.34
10.61	3.29	1.75	2.35
10.615	3.38	1.83	2.37
10.62	3.34	1.88	2.42
10.625	3.23	1.91	2.46
10.63	3.09	1.95	2.44
10.635	2.97	1.95	2.38
10.64	2.86	1.95	2.36
10.645	2.71	1.87	2.32
10.65	2.52	1.77	2.29
10.655	2.46	1.72	2.24
10.66	2.41	1.67	2.2
10.665	2.38	1.58	2.19
10.67	2.35	1.53	2.15
10.675	2.28	1.53	2.04
10.68	2.21	1.52	2.07
10.685	2.27	1.48	2.11
10.69	2.22	1.48	2.08
10.695	2.24	1.45	2.02
10.7	2.25	1.44	2.02
10.705	2.3	1.47	2.07
10.71	2.3	1.49	2.19
10.715	2.34	1.49	2.18
10.72	2.42	1.5	2.21
10.725	2.64	1.51	2.29
10.73	2.87	1.6	2.42
10.735	3.02	1.68	2.59
10.74	3.12	1.76	2.71
10.745	3.22	1.9	2.76
10.75	3.14	2.08	2.86
10.755	2.98	2.25	2.9
10.76	2.88	2.33	2.8
10.765	2.9	2.24	2.72
10.77	2.89	2.15	2.65
10.775	2.77	2.16	2.57
10.78	2.66	2.11	2.5
10.785	2.63	2.04	2.45
10.79	2.59	1.94	2.47
10.795	2.54	1.84	2.48
10.8	2.49	1.73	2.4
10.805	2.48	1.7	2.36
10.81	2.46	1.7	2.37
10.815	2.44	1.69	2.35
10.82	2.45	1.74	2.28
10.825	2.49	1.73	2.24
10.83	2.44	1.69	2.24
10.835	2.43	1.66	2.28
10.84	2.45	1.63	2.26
10.845	2.41	1.6	2.24
10.85	2.37	1.62	2.26
10.855	2.37	1.6	2.25
10.86	2.42	1.54	2.25
10.865	2.45	1.57	2.26
10.87	2.43	1.58	2.25
10.875	2.37	1.55	2.21
10.88	2.34	1.56	2.22
10.885	2.32	1.58	2.2
10.89	2.3	1.6	2.2
10.895	2.36	1.6	2.21
10.9	2.41	1.55	2.18
10.905	2.33	1.57	2.07
10.91	2.29	1.56	2.13
10.915	2.32	1.56	2.21
10.92	2.33	1.63	2.18
10.925	2.31	1.6	2.19
10.93	2.34	1.56	2.19
10.935	2.32	1.56	2.13
10.94	2.28	1.57	2.16
10.945	2.27	1.49	2.1
10.95	2.31	1.61	2.08
10.955	2.32	1.59	2.11
10.96	2.3	1.55	2.12
10.965	2.28	1.5	2.1
10.97	2.26	1.48	2.15
10.975	2.27	1.53	2.16
10.98	2.29	1.5	2.13
10.985	2.3	1.51	2.13
10.99	2.33	1.55	2.22
10.995	2.36	1.6	2.27
11	2.42	1.65	2.28
11.005	2.45	1.67	2.31
11.01	2.38	1.67	2.31
11.015	2.4	1.67	2.27
11.02	2.45	1.66	2.3
11.025	2.44	1.66	2.34
11.03	2.4	1.66	2.33
11.035	2.37	1.64	2.26
11.04	2.34	1.63	2.2
11.045	2.28	1.66	2.18
11.05	2.26	1.61	2.17
11.055	2.26	1.56	2.16
11.06	2.25	1.53	2.17
11.065	2.27	1.5	2.19
11.07	2.27	1.47	2.21
11.075	2.22	1.49	2.23
11.08	2.21	1.49	2.21
11.085	2.22	1.51	2.19
11.09	2.24	1.56	2.17
11.095	2.27	1.57	2.18
11.1	2.29	1.51	2.22
11.105	2.28	1.44	2.21
11.11	2.25	1.45	2.13
11.115	2.22	1.47	2.08
11.12	2.25	1.46	2.07
11.125	2.28	1.46	2.1
11.13	2.18	1.46	2.13
11.135	2.16	1.43	2.17
11.14	2.23	1.47	2.13
11.145	2.25	1.51	2.15
11.15	2.24	1.51	2.19
11.155	2.2	1.5	2.2
11.16	2.22	1.54	2.16
11.165	2.29	1.56	2.18
11.17	2.29	1.56	2.16
11.175	2.27	1.51	2.17
11.18	2.32	1.5	2.17
11.185	2.34	1.51	2.2
11.19	2.34	1.57	2.23
11.195	2.29	1.55	2.25
11.2	2.31	1.53	2.19
11.205	2.29	1.5	2.2
11.21	2.26	1.55	2.2
11.215	2.24	1.54	2.14
11.22	2.26	1.53	2.1
11.225	2.28	1.52	2.08
11.23	2.26	1.52	2.09
11.235	2.18	1.49	2.05
11.24	2.19	1.45	2.09
11.245	2.18	1.43	2.09
11.25	2.12	1.46	2.1
11.255	2.24	1.49	2.1
11.26	2.28	1.44	2.12
11.265	2.27	1.45	2.06
11.27	2.24	1.49	2
11.275	2.25	1.54	2.03
11.28	2.29	1.55	2.1
11.285	2.29	1.49	2.05
11.29	2.21	1.4	2.08
11.295	2.19	1.43	2.07
11.3	2.21	1.45	2.07
11.305	2.28	1.45	2.07
11.31	2.28	1.49	2.08
11.315	2.25	1.45	2.06
11.32	2.18	1.48	2.07
11.325	2.15	1.5	2.11
11.33	2.25	1.55	2.15
11.335	2.3	1.55	2.17
11.34	2.24	1.55	2.18
11.345	2.18	1.62	2.16
11.35	2.25	1.61	2.11
11.355	2.24	1.57	2.08
11.36	2.16	1.55	2.06
11.365	2.1	1.56	2.04
11.37	2.11	1.53	2.04
11.375	2.13	1.5	2.02
11.38	2.23	1.46	2.05
11.385	2.22	1.47	2.07
11.39	2.26	1.47	2.03
11.395	2.23	1.43	2.04
11.4	2.12	1.4	2.02
11.405	2.06	1.41	2.11
11.41	2.1	1.42	2.09
11.415	2.13	1.42	2.03
11.42	2.16	1.41	2.04
11.425	2.15	1.4	2.08
11.43	2.15	1.39	2.11
11.435	2.19	1.39	2.08
11.44	2.3	1.41	2.06
11.445	2.24	1.42	2.04
11.45	2.19	1.4	2
11.455	2.17	1.4	2.02
11.46	2.14	1.38	2.03
11.465	2.12	1.42	2.02
11.47	2.17	1.39	2.02
11.475	2.23	1.4	1.99
11.48	2.31	1.42	2.04
11.485	2.27	1.46	2.01
11.49	2.26	1.45	2.02
11.495	2.3	1.43	2.06
11.5	2.28	1.43	2.07
11.505	2.26	1.42	2.08
11.51	2.28	1.44	2.09
11.515	2.28	1.43	2.12
11.52	2.24	1.43	2.14
11.525	2.24	1.43	2.13
11.53	2.25	1.48	2.11
11.535	2.25	1.49	2.08
11.54	2.24	1.47	2.04
11.545	2.23	1.44	2.02
11.55	2.18	1.44	2.05
11.555	2.2	1.47	2.07
11.56	2.19	1.47	2.04
11.565	2.19	1.46	2.09
11.57	2.16	1.51	2.05
11.575	2.14	1.45	1.99
11.58	2.16	1.51	2.02
11.585	2.17	1.53	2.01
11.59	2.17	1.49	2
11.595	2.19	1.49	2.02
11.6	2.17	1.49	2.03
11.605	2.16	1.45	2.02
11.61	2.16	1.49	2.05
11.615	2.1	1.49	2.07
11.62	2.14	1.45	2.06
11.625	2.16	1.48	2.07
11.63	2.1	1.49	2.12
11.635	2.11	1.49	2.18
11.64	2.15	1.46	2.12
11.645	2.16	1.46	2.11
11.65	2.23	1.45	2.11
11.655	2.24	1.43	2.07
11.66	2.15	1.44	2.04
11.665	2.14	1.48	1.94
11.67	2.16	1.48	1.98
11.675	2.11	1.47	1.96
11.68	2.16	1.47	1.99
11.685	2.16	1.43	1.98
11.69	2.12	1.45	1.97
11.695	2.12	1.44	1.98
11.7	2.12	1.46	1.96
11.705	2.14	1.43	1.94
11.71	2.14	1.39	2
11.715	2.12	1.4	1.97
11.72	2.15	1.4	1.84
11.725	2.19	1.39	1.99
11.73	2.19	1.46	2.03
11.735	2.23	1.48	2.01
11.74	2.27	1.5	1.95
11.745	2.24	1.51	1.97
11.75	2.2	1.57	2.06
11.755	2.23	1.54	2.11
11.76	2.28	1.48	2.09
11.765	2.3	1.52	2.11
11.77	2.35	1.55	2.1
11.775	2.34	1.52	2.06
11.78	2.31	1.52	2.08
11.785	2.27	1.53	2.12
11.79	2.21	1.51	2.13
11.795	2.14	1.46	2.12
11.8	2.21	1.48	2.12
11.805	2.27	1.46	2.14
11.81	2.29	1.39	2.11
11.815	2.27	1.4	2.12
11.82	2.22	1.45	2.1
11.825	2.2	1.46	2.11
11.83	2.23	1.46	2.17
11.835	2.15	1.46	2.16
11.84	2.13	1.45	2.08
11.845	2.05	1.46	2.05
11.85	2.09	1.49	2.1
11.855	2.21	1.5	2.11
11.86	2.28	1.44	2.08
11.865	2.33	1.39	2.12
11.87	2.38	1.47	2.23
11.875	2.48	1.57	2.35
11.88	2.57	1.67	2.44
11.885	2.63	1.78	2.48
11.89	2.62	1.84	2.55
11.895	2.6	1.93	2.56
11.9	2.6	2.01	2.53
11.905	2.63	2.03	2.54
11.91	2.65	1.98	2.53
11.915	2.65	1.97	2.54
11.92	2.68	1.99	2.68
11.925	2.78	2	2.91
11.93	3.08	2.04	3.14
11.935	3.48	2.15	3.47
11.94	3.85	2.34	3.92
11.945	4.19	2.68	4.42
11.95	4.48	3.18	4.87
11.955	4.73	3.71	5.28
11.96	5.02	4.19	5.52
11.965	5.18	4.7	5.53
11.97	5.06	5.19	5.53
11.975	4.82	5.52	5.45
11.98	4.57	5.62	5.05
11.985	4.16	5.47	4.49
11.99	3.67	5.05	4
11.995	3.3	4.5	3.51
12	3.04	3.89	3.13
12.005	2.82	3.36	2.85
12.01	2.67	2.89	2.6
12.015	2.57	2.42	2.5
12.02	2.51	2.07	2.46
12.025	2.45	1.9	2.42
12.03	2.42	1.82	2.36
12.035	2.45	1.73	2.3
12.04	2.4	1.7	2.27
12.045	2.4	1.69	2.25
12.05	2.46	1.71	2.24
12.055	2.4	1.71	2.28
12.06	2.36	1.65	2.27
12.065	2.35	1.67	2.19
12.07	2.34	1.72	2.15
12.075	2.35	1.7	2.16
12.08	2.35	1.61	2.22
12.085	2.38	1.64	2.24
12.09	2.42	1.69	2.24
12.095	2.43	1.65	2.23
12.1	2.28	1.65	2.22
12.105	2.39	1.66	2.21
12.11	2.4	1.65	2.21
12.115	2.41	1.57	2.21
12.12	2.35	1.61	2.2
12.125	2.27	1.61	2.19
12.13	2.33	1.6	2.21
12.135	2.31	1.61	2.15
12.14	2.33	1.62	2.13
12.145	2.38	1.61	2.11
12.15	2.38	1.63	2.1
12.155	2.39	1.66	2.13
12.16	2.4	1.61	2.18
12.165	2.33	1.59	2.14
12.17	2.34	1.59	2.13
12.175	2.36	1.62	2.15
12.18	2.39	1.66	2.14
12.185	2.45	1.66	2.13
12.19	2.46	1.66	2.15
12.195	2.48	1.73	2.14
12.2	2.47	1.78	2.15
12.205	2.51	1.8	2.18
12.21	2.54	1.8	2.25
12.215	2.48	1.83	2.3
12.22	2.39	1.83	2.28
12.225	2.4	1.78	2.22
12.23	2.34	1.76	2.13
12.235	2.42	1.8	2.08
12.24	2.38	1.76	2.08
12.245	2.33	1.65	2.12
12.25	2.31	1.61	2.16
12.255	2.37	1.59	2.15
12.26	2.34	1.55	2.15
12.265	2.29	1.54	2.17
12.27	2.29	1.57	2.15
12.275	2.34	1.57	2.16
12.28	2.36	1.58	2.16
12.285	2.31	1.59	2.12
12.29	2.3	1.62	2.05
12.295	2.33	1.62	1.99
12.3	2.32	1.64	2.08
12.305	2.32	1.65	2.15
12.31	2.34	1.68	2.16
12.315	2.27	1.65	2.11
12.32	2.26	1.6	2.06
12.325	2.28	1.56	2.08
12.33	2.31	1.56	2.06
12.335	2.24	1.54	2.05
12.34	2.2	1.54	2.06
12.345	2.2	1.55	2.05
12.35	2.22	1.56	2.08
12.355	2.2	1.53	2.15
12.36	2.26	1.54	2.15
12.365	2.32	1.54	2.12
12.37	2.3	1.6	2.11
12.375	2.28	1.62	2.17
12.38	2.35	1.6	2.25
12.385	2.44	1.6	2.28
12.39	2.48	1.66	2.25
12.395	2.47	1.68	2.27
12.4	2.47	1.72	2.28
12.405	2.41	1.77	2.28
12.41	2.34	1.75	2.23
12.415	2.29	1.71	2.18
12.42	2.3	1.71	2.18
12.425	2.32	1.72	2.15
12.43	2.3	1.69	2.14
12.435	2.26	1.64	2.08
12.44	2.28	1.62	2.13
12.445	2.34	1.56	2.1
12.45	2.33	1.53	2.11
12.455	2.31	1.55	2.08
12.46	2.34	1.63	2.06
12.465	2.25	1.64	2.05
12.47	2.31	1.61	2.05
12.475	2.36	1.58	2.09
12.48	2.4	1.59	2.12
12.485	2.37	1.61	2.14
12.49	2.35	1.61	2.13
12.495	2.39	1.64	2.12
12.5	2.35	1.65	2.12
12.505	2.37	1.61	2.13
12.51	2.45	1.59	2.09
12.515	2.44	1.6	2.08
12.52	2.42	1.6	2.05
12.525	2.43	1.59	2.08
12.53	2.38	1.58	2.12
12.535	2.43	1.55	2.19
12.54	2.43	1.55	2.26
12.545	2.53	1.58	2.37
12.55	2.7	1.67	2.59
12.555	2.78	1.79	2.76
12.56	2.82	1.99	2.78
12.565	2.92	2.23	2.89
12.57	3.09	2.44	3.07
12.575	3.2	2.68	3.19
12.58	3.17	2.92	3.23
12.585	3.1	3.07	3.2
12.59	2.98	3.09	3.12
12.595	2.88	3.02	2.97
12.6	2.77	2.94	2.85
12.605	2.7	2.77	2.71
12.61	2.62	2.55	2.6
12.615	2.61	2.36	2.58
12.62	2.68	2.2	2.56
12.625	2.64	2.11	2.51
12.63	2.6	2.09	2.44
12.635	2.65	2.05	2.34
12.64	2.74	2	2.36
12.645	2.69	1.93	2.46
12.65	2.67	1.95	2.42
12.655	2.72	1.97	2.36
12.66	2.67	1.94	2.28
12.665	2.57	1.93	2.27
12.67	2.47	1.89	2.28
12.675	2.4	1.92	2.28
12.68	2.41	1.94	2.27
12.685	2.43	1.9	2.24
12.69	2.44	1.81	2.22
12.695	2.4	1.75	2.17
12.7	2.41	1.72	2.13
12.705	2.47	1.67	2.14
12.71	2.43	1.64	2.2
12.715	2.36	1.64	2.21
12.72	2.32	1.69	2.17
12.725	2.28	1.73	2.17
12.73	2.24	1.72	2.24
12.735	2.2	1.71	2.18
12.74	2.19	1.66	2.12
12.745	2.24	1.64	2.14
12.75	2.28	1.61	2.15
12.755	2.28	1.6	2.16
12.76	2.31	1.58	2.12
12.765	2.32	1.58	2.07
12.77	2.34	1.6	2.09
12.775	2.34	1.6	2.12
12.78	2.34	1.55	2.16
12.785	2.34	1.54	2.15
12.79	2.39	1.52	2.15
12.795	2.4	1.53	2.14
12.8	2.35	1.51	2.17
12.805	2.25	1.46	2.21
12.81	2.31	1.51	2.19
12.815	2.32	1.55	2.14
12.82	2.31	1.56	2.15
12.825	2.37	1.58	2.16
12.83	2.33	1.58	2.17
12.835	2.34	1.62	2.23
12.84	2.34	1.66	2.3
12.845	2.35	1.68	2.28
12.85	2.41	1.65	2.29
12.855	2.46	1.66	2.38
12.86	2.43	1.73	2.42
12.865	2.44	1.82	2.4
12.87	2.46	1.85	2.4
12.875	2.5	1.84	2.39
12.88	2.51	1.81	2.33
12.885	2.46	1.79	2.34
12.89	2.37	1.79	2.27
12.895	2.28	1.81	2.2
12.9	2.19	1.79	2.14
12.905	2.2	1.71	2.07
12.91	2.21	1.66	2
12.915	2.22	1.58	2.01
12.92	2.25	1.49	2.03
12.925	2.34	1.47	2.05
12.93	2.36	1.46	2.03
12.935	2.32	1.43	2
12.94	2.25	1.39	2.02
12.945	2.2	1.46	2.06
12.95	2.17	1.5	2.11
12.955	2.19	1.49	2.11
12.96	2.23	1.53	2.03
12.965	2.19	1.51	1.98
12.97	2.2	1.45	2.04
12.975	2.29	1.4	2.06
12.98	2.34	1.45	2.08
12.985	2.36	1.47	2.1
12.99	2.37	1.51	2.1
12.995	2.39	1.55	2.11
13	2.37	1.58	2.14
13.005	2.37	1.59	2.13
13.01	2.4	1.6	2.13
13.015	2.38	1.6	2.17
13.02	2.38	1.58	2.19
13.025	2.44	1.56	2.19
13.03	2.47	1.63	2.22
13.035	2.48	1.69	2.23
13.04	2.48	1.75	2.23
13.045	2.44	1.76	2.24
13.05	2.43	1.73	2.26
13.055	2.42	1.72	2.31
13.06	2.44	1.71	2.31
13.065	2.4	1.7	2.28
13.07	2.33	1.69	2.28
13.075	2.25	1.71	2.23
13.08	2.22	1.71	2.17
13.085	2.26	1.68	2.09
13.09	2.27	1.65	2.06
13.095	2.27	1.57	2.08
13.1	2.25	1.48	2.13
13.105	2.23	1.46	2.06
13.11	2.2	1.46	2.05
13.115	2.19	1.43	2.05
13.12	2.18	1.46	2.07
13.125	2.15	1.41	2.06
13.13	2.15	1.4	2.04
13.135	2.14	1.41	2.03
13.14	2.2	1.37	2.02
13.145	2.23	1.4	2.05
13.15	2.15	1.45	2.08
13.155	2.25	1.45	2.15
13.16	2.31	1.48	2.2
13.165	2.41	1.52	2.3
13.17	2.6	1.52	2.52
13.175	2.98	1.64	2.88
13.18	3.36	1.85	3.27
13.185	3.8	2.07	3.7
13.19	4.35	2.41	4.43
13.195	4.99	2.91	5.46
13.2	5.81	3.6	6.45
13.205	6.46	4.37	7.1
13.21	6.96	5.25	7.59
13.215	7.34	6.23	8.05
13.22	7.38	7.21	8.18
13.225	7.03	8.1	8.07
13.23	6.52	8.65	7.81
13.235	5.88	8.76	7.15
13.24	5.15	8.4	6.28
13.245	4.53	7.66	5.37
13.25	4.08	6.75	4.52
13.255	3.7	5.78	3.91
13.26	3.36	4.77	3.43
13.265	3.14	3.89	3.08
13.27	2.96	3.25	2.88
13.275	2.81	2.8	2.76
13.28	2.74	2.47	2.63
13.285	2.72	2.27	2.46
13.29	2.7	2.09	2.39
13.295	2.64	1.96	2.47
13.3	2.63	1.86	2.5
13.305	2.58	1.81	2.45
13.31	2.56	1.78	2.37
13.315	2.61	1.79	2.4
13.32	2.63	1.8	2.4
13.325	2.72	1.81	2.46
13.33	2.74	1.8	2.47
13.335	2.65	1.76	2.49
13.34	2.63	1.72	2.49
13.345	2.64	1.76	2.49
13.35	2.61	1.83	2.46
13.355	2.52	1.86	2.37
13.36	2.43	1.79	2.33
13.365	2.61	1.79	2.24
13.37	2.63	1.78	2.28
13.375	2.57	1.77	2.25
13.38	2.55	1.82	2.25
13.385	2.57	1.83	2.29
13.39	2.52	1.83	2.28
13.395	2.52	1.8	2.28
13.4	2.48	1.73	2.3
13.405	2.4	1.67	2.24
13.41	2.37	1.7	2.16
13.415	2.39	1.72	2.17
13.42	2.45	1.68	2.18
13.425	2.45	1.63	2.2
13.43	2.45	1.63	2.16
13.435	2.45	1.65	2.16
13.44	2.46	1.67	2.17
13.445	2.49	1.66	2.17
13.45	2.45	1.63	2.18
13.455	2.43	1.65	2.25
13.46	2.53	1.61	2.28
13.465	2.57	1.59	2.23
13.47	2.47	1.6	2.21
13.475	2.4	1.61	2.15
13.48	2.45	1.6	2.15
13.485	2.49	1.55	2.15
13.49	2.48	1.53	2.19
13.495	2.47	1.62	2.23
13.5	2.45	1.65	2.3
13.505	2.49	1.64	2.31
13.51	2.53	1.68	2.32
13.515	2.5	1.65	2.35
13.52	2.45	1.7	2.41
13.525	2.43	1.74	2.4
13.53	2.5	1.83	2.38
13.535	2.5	1.88	2.4
13.54	2.47	1.87	2.43
13.545	2.47	1.84	2.35
13.55	2.43	1.84	2.28
13.555	2.41	1.82	2.28
13.56	2.43	1.76	2.26
13.565	2.42	1.71	2.2
13.57	2.44	1.67	2.14
13.575	2.47	1.6	2.11
13.58	2.41	1.57	2.14
13.585	2.35	1.57	2.16
13.59	2.4	1.59	2.09
13.595	2.44	1.59	2.05
13.6	2.4	1.61	2.08
13.605	2.37	1.61	2.12
13.61	2.45	1.61	2.12
13.615	2.51	1.62	2.14
13.62	2.47	1.6	2.2
13.625	2.36	1.56	2.16
13.63	2.29	1.56	2.17
13.635	2.26	1.59	2.23
13.64	2.24	1.54	2.11
13.645	2.21	1.51	2.09
13.65	2.26	1.53	2.04
13.655	2.23	1.5	2.04
13.66	2.26	1.48	2.12
13.665	2.28	1.48	2.07
13.67	2.28	1.5	2.07
13.675	2.27	1.49	2.1
13.68	2.26	1.52	2.07
13.685	2.28	1.51	2.05
13.69	2.25	1.49	2.09
13.695	2.18	1.54	2.12
13.7	2.14	1.55	2.15
13.705	2.17	1.55	2.12
13.71	2.19	1.52	2.06
13.715	2.21	1.49	2.02
13.72	2.25	1.49	2.03
13.725	2.23	1.5	2.04
13.73	2.26	1.5	2.08
13.735	2.26	1.49	2.07
13.74	2.23	1.47	2.08
13.745	2.23	1.47	2.1
13.75	2.26	1.49	2.14
13.755	2.34	1.51	2.14
13.76	2.33	1.52	2.06
13.765	2.35	1.49	2.07
13.77	2.37	1.49	2.12
13.775	2.28	1.52	2.15
13.78	2.21	1.52	2.13
13.785	2.25	1.49	2.07
13.79	2.33	1.51	2.1
13.795	2.41	1.54	2.17
13.8	2.42	1.57	2.2
13.805	2.48	1.63	2.23
13.81	2.62	1.66	2.34
13.815	2.72	1.72	2.43
13.82	2.77	1.77	2.47
13.825	2.81	1.86	2.56
13.83	2.79	1.97	2.66
13.835	2.82	2.04	2.68
13.84	2.88	2.06	2.68
13.845	2.82	2.04	2.64
13.85	2.7	2.06	2.55
13.855	2.66	2.05	2.52
13.86	2.66	2.04	2.53
13.865	2.62	2.03	2.55
13.87	2.56	2.02	2.53
13.875	2.57	1.97	2.52
13.88	2.52	1.9	2.52
13.885	2.48	1.86	2.41
13.89	2.5	1.86	2.37
13.895	2.43	1.86	2.4
13.9	2.51	1.88	2.36
13.905	2.52	1.87	2.34
13.91	2.55	1.9	2.42
13.915	2.62	1.89	2.52
13.92	2.63	1.89	2.63
13.925	2.72	1.91	2.7
13.93	2.92	1.96	2.86
13.935	3.02	2	3.01
13.94	3.04	2.11	3.18
13.945	3.1	2.29	3.31
13.95	3.11	2.48	3.41
13.955	3.09	2.62	3.39
13.96	3.05	2.68	3.28
13.965	2.91	2.72	3.26
13.97	2.85	2.72	3.22
13.975	2.91	2.61	3.02
13.98	2.87	2.5	2.81
13.985	2.75	2.41	2.68
13.99	2.7	2.27	2.53
13.995	2.7	2.14	2.46
14	2.65	2.03	2.5
14.005	2.6	1.96	2.48
14.01	2.6	1.93	2.45
14.015	2.66	1.93	2.42
14.02	2.63	1.89	2.37
14.025	2.62	1.82	2.37
14.03	2.62	1.78	2.35
14.035	2.61	1.79	2.31
14.04	2.63	1.77	2.34
14.045	2.68	1.77	2.43
14.05	2.68	1.83	2.48
14.055	2.68	1.91	2.45
14.06	2.68	1.95	2.46
14.065	2.66	2.04	2.52
14.07	2.68	2.07	2.6
14.075	2.66	2.06	2.64
14.08	2.63	2.1	2.59
14.085	2.61	2.1	2.53
14.09	2.61	2.07	2.52
14.095	2.61	2.07	2.53
14.1	2.55	2.02	2.51
14.105	2.46	1.95	2.49
14.11	2.42	1.93	2.43
14.115	2.38	1.92	2.36
14.12	2.36	1.85	2.27
14.125	2.4	1.75	2.21
14.13	2.44	1.69	2.15
14.135	2.37	1.66	2.13
14.14	2.4	1.61	2.16
14.145	2.38	1.59	2.22
14.15	2.31	1.61	2.23
14.155	2.27	1.62	2.19
14.16	2.27	1.64	2.12
14.165	2.27	1.6	2.1
14.17	2.25	1.54	2.15
14.175	2.25	1.54	2.13
14.18	2.28	1.56	2.1
14.185	2.3	1.57	2.13
14.19	2.33	1.6	2.15
14.195	2.38	1.57	2.15
14.2	2.43	1.51	2.14
14.205	2.41	1.47	2.12
14.21	2.35	1.51	2.12
14.215	2.34	1.51	2.13
14.22	2.31	1.53	2.14
14.225	2.26	1.56	2.14
14.23	2.29	1.51	2.08
14.235	2.28	1.51	2.01
14.24	2.3	1.56	2.03
14.245	2.3	1.57	2.09
14.25	2.23	1.52	2.1
14.255	2.22	1.53	2.09
14.26	2.26	1.56	2.07
14.265	2.35	1.55	2.09
14.27	2.38	1.58	2.15
14.275	2.4	1.63	2.17
14.28	2.41	1.65	2.16
14.285	2.44	1.68	2.2
14.29	2.46	1.69	2.25
14.295	2.47	1.73	2.28
14.3	2.43	1.77	2.33
14.305	2.4	1.74	2.34
14.31	2.36	1.75	2.28
14.315	2.38	1.79	2.25
14.32	2.34	1.79	2.21
14.325	2.26	1.74	2.14
14.33	2.27	1.69	2.11
14.335	2.25	1.63	2.15
14.34	2.26	1.61	2.15
14.345	2.22	1.57	2.12
14.35	2.22	1.55	2.07
14.355	2.16	1.55	2.04
14.36	2.18	1.54	2.04
14.365	2.17	1.54	2.07
14.37	2.3	1.53	2.11
14.375	2.3	1.51	2.12
14.38	2.22	1.54	2.16
14.385	2.21	1.55	2.2
14.39	2.25	1.54	2.13
14.395	2.31	1.52	2.17
14.4	2.32	1.54	2.12
14.405	2.37	1.58	2.04
14.41	2.42	1.57	2
14.415	2.38	1.54	2.05
14.42	2.31	1.58	2.05
14.425	2.29	1.61	2.04
14.43	2.36	1.65	2.03
14.435	2.31	1.65	2.05
14.44	2.28	1.62	2.08
14.445	2.26	1.57	2.05
14.45	2.25	1.59	1.96
14.455	2.22	1.61	2.02
14.46	2.16	1.59	2.09
14.465	2.16	1.54	2.1
14.47	2.12	1.57	2.06
14.475	2.12	1.58	2.05
14.48	2.19	1.56	2.07
14.485	2.21	1.56	2.11
14.49	2.2	1.59	2.11
14.495	2.2	1.55	2.1
14.5	2.17	1.53	2.18
14.505	2.21	1.55	2.27
14.51	2.2	1.57	2.29
14.515	2.23	1.59	2.37
14.52	2.21	1.56	2.51
14.525	2.22	1.59	2.62
14.53	2.16	1.61	2.64
14.535	2.12	1.69	2.74
14.54	2.13	1.76	2.86
14.545	2.17	1.79	2.89
14.55	2.25	1.82	2.91
14.555	2.32	1.85	2.92
14.56	2.26	1.86	2.87
14.565	2.2	1.85	2.77
14.57	2.2	1.86	2.65
14.575	2.26	1.84	2.55
14.58	2.3	1.77	2.43
14.585	2.23	1.73	2.32
14.59	2.13	1.7	2.25
14.595	2.19	1.66	2.21
14.6	2.2	1.64	2.13
14.605	2.25	1.63	2.14
14.61	2.34	1.58	2.17
14.615	2.43	1.55	2.19
14.62	2.49	1.56	2.21
14.625	2.58	1.58	2.26
14.63	2.79	1.68	2.4
14.635	3.11	1.76	2.6
14.64	3.44	1.78	2.87
14.645	3.84	1.83	3.13
14.65	4.3	2.04	3.43
14.655	4.73	2.29	3.71
14.66	4.97	2.49	3.94
14.665	5.08	2.69	4
14.67	5.26	2.93	3.98
14.675	5.24	3.16	3.95
14.68	4.99	3.34	3.88
14.685	4.81	3.46	3.77
14.69	4.59	3.5	3.8
14.695	4.25	3.4	3.82
14.7	4.06	3.34	3.77
14.705	3.93	3.29	3.77
14.71	3.8	3.24	3.83
14.715	3.75	3.23	3.93
14.72	3.62	3.24	3.96
14.725	3.56	3.3	3.85
14.73	3.58	3.37	3.79
14.735	3.49	3.38	3.73
14.74	3.36	3.39	3.55
14.745	3.25	3.37	3.34
14.75	3.12	3.24	3.17
14.755	2.99	3	2.98
14.76	2.96	2.73	2.79
14.765	2.88	2.51	2.69
14.77	2.79	2.33	2.63
14.775	2.79	2.18	2.54
14.78	2.82	2.06	2.45
14.785	2.86	2.01	2.41
14.79	2.92	1.96	2.46
14.795	3	1.91	2.47
14.8	3.09	1.9	2.41
14.805	3.23	1.97	2.44
14.81	3.35	1.96	2.48
14.815	3.4	1.91	2.48
14.82	3.53	1.93	2.42
14.825	3.57	1.96	2.37
14.83	3.52	1.94	2.38
14.835	3.48	1.91	2.4
14.84	3.4	1.9	2.41
14.845	3.31	1.88	2.39
14.85	3.18	1.88	2.3
14.855	3.03	1.89	2.25
14.86	2.91	1.94	2.23
14.865	2.87	1.93	2.17
14.87	2.78	1.91	2.22
14.875	2.67	1.82	2.19
14.88	2.65	1.75	2.17
14.885	2.65	1.72	2.15
14.89	2.62	1.67	2.15
14.895	2.6	1.72	2.11
14.9	2.61	1.72	2.07
14.905	2.62	1.7	2.06
14.91	2.58	1.65	2.09
14.915	2.56	1.66	2.11
14.92	2.48	1.62	2.1
14.925	2.47	1.58	2.11
14.93	2.54	1.56	2.09
14.935	2.63	1.58	2.12
14.94	2.6	1.65	2.16
14.945	2.5	1.67	2.17
14.95	2.5	1.64	2.13
14.955	2.5	1.65	2.08
14.96	2.46	1.61	2.06
14.965	2.43	1.59	2.12
14.97	2.44	1.62	2.13
14.975	2.45	1.63	2.09
14.98	2.38	1.67	2.05
14.985	2.38	1.66	2.1
14.99	2.43	1.64	2.07
14.995	2.39	1.6	2.03
15	2.37	1.58	2.07
15.005	2.41	1.51	2.08
15.01	2.36	1.45	2.05
15.015	2.31	1.48	2.04
15.02	2.38	1.52	2.08
15.025	2.39	1.52	2.16
15.03	2.38	1.51	2.17
15.035	2.41	1.5	2.05
15.04	2.43	1.47	2.01
15.045	2.48	1.49	2.05
15.05	2.44	1.57	2.11
15.055	2.31	1.57	2.09
15.06	2.3	1.55	2.1
15.065	2.33	1.56	2.09
15.07	2.44	1.52	2.14
15.075	2.56	1.53	2.21
15.08	2.66	1.54	2.32
15.085	2.8	1.59	2.47
15.09	3.1	1.63	2.62
15.095	3.5	1.7	2.79
15.1	3.92	1.81	3.08
15.105	4.3	1.95	3.43
15.11	4.69	2.12	3.69
15.115	5.11	2.36	3.92
15.12	5.45	2.67	4.09
15.125	5.56	3	4.15
15.13	5.46	3.29	4.04
15.135	5.23	3.46	3.91
15.14	4.91	3.49	3.75
15.145	4.46	3.46	3.53
15.15	4.04	3.36	3.26
15.155	3.69	3.16	3.06
15.16	3.37	2.96	2.85
15.165	3.14	2.7	2.58
15.17	2.96	2.4	2.38
15.175	2.87	2.13	2.29
15.18	2.77	1.93	2.22
15.185	2.7	1.85	2.19
15.19	2.66	1.77	2.16
15.195	2.64	1.71	2.12
15.2	2.63	1.71	2.12
15.205	2.58	1.63	2.16
15.21	2.53	1.6	2.17
15.215	2.55	1.57	2.15
15.22	2.58	1.55	2.09
15.225	2.48	1.6	2.1
15.23	2.49	1.64	2.18
15.235	2.55	1.61	2.2
15.24	2.57	1.59	2.24
15.245	2.62	1.61	2.23
15.25	2.67	1.6	2.21
15.255	2.71	1.59	2.21
15.26	2.7	1.64	2.24
15.265	2.66	1.67	2.24
15.27	2.73	1.69	2.27
15.275	2.77	1.7	2.34
15.28	2.8	1.69	2.39
15.285	2.88	1.74	2.44
15.29	3.08	1.76	2.47
15.295	3.21	1.79	2.54
15.3	3.28	1.84	2.62
15.305	3.4	1.83	2.63
15.31	3.61	1.89	2.59
15.315	3.75	1.94	2.56
15.32	3.74	1.98	2.53
15.325	3.68	1.99	2.56
15.33	3.57	1.97	2.54
15.335	3.35	1.97	2.47
15.34	3.17	1.95	2.37
15.345	2.99	1.92	2.27
15.35	2.81	1.89	2.21
15.355	2.73	1.79	2.18
15.36	2.7	1.68	2.19
15.365	2.65	1.64	2.23
15.37	2.65	1.68	2.29
15.375	2.67	1.62	2.32
15.38	2.76	1.63	2.29
15.385	2.85	1.7	2.32
15.39	2.91	1.7	2.41
15.395	2.92	1.65	2.44
15.4	3.02	1.68	2.4
15.405	3.21	1.79	2.4
15.41	3.29	1.94	2.43
15.415	3.33	2.06	2.47
15.42	3.43	2.07	2.58
15.425	3.55	2.11	2.66
15.43	3.54	2.18	2.63
15.435	3.52	2.18	2.66
15.44	3.56	2.2	2.64
15.445	3.53	2.24	2.65
15.45	3.44	2.24	2.65
15.455	3.37	2.21	2.6
15.46	3.24	2.24	2.57
15.465	3.03	2.23	2.49
15.47	2.9	2.16	2.35
15.475	2.8	2.05	2.28
15.48	2.74	1.92	2.28
15.485	2.71	1.86	2.24
15.49	2.66	1.77	2.23
15.495	2.67	1.75	2.22
15.5	2.64	1.73	2.17
15.505	2.57	1.68	2.12
15.51	2.59	1.64	2.13
15.515	2.54	1.64	2.16
15.52	2.47	1.62	2.19
15.525	2.5	1.56	2.21
15.53	2.6	1.55	2.21
15.535	2.62	1.62	2.15
15.54	2.45	1.63	2.11
15.545	2.44	1.57	2.1
15.55	2.51	1.58	2.13
15.555	2.61	1.63	2.15
15.56	2.7	1.61	2.16
15.565	2.73	1.61	2.24
15.57	2.76	1.65	2.29
15.575	2.8	1.68	2.32
15.58	2.82	1.69	2.32
15.585	2.86	1.69	2.36
15.59	2.84	1.69	2.34
15.595	2.79	1.7	2.32
15.6	2.8	1.73	2.3
15.605	2.75	1.76	2.28
15.61	2.67	1.79	2.21
15.615	2.6	1.79	2.24
15.62	2.59	1.75	2.26
15.625	2.58	1.71	2.21
15.63	2.52	1.71	2.15
15.635	2.51	1.68	2.14
15.64	2.51	1.61	2.16
15.645	2.49	1.61	2.12
15.65	2.48	1.63	2.13
15.655	2.51	1.64	2.13
15.66	2.53	1.61	2.13
15.665	2.51	1.62	2.14
15.67	2.55	1.65	2.17
15.675	2.66	1.66	2.17
15.68	2.78	1.64	2.18
15.685	2.92	1.61	2.25
15.69	2.95	1.61	2.29
15.695	2.97	1.66	2.35
15.7	3.02	1.72	2.35
15.705	2.98	1.8	2.38
15.71	3.01	1.83	2.34
15.715	3.21	1.84	2.35
15.72	3.26	1.92	2.43
15.725	3.14	1.99	2.44
15.73	3.02	1.99	2.43
15.735	2.94	1.95	2.37
15.74	2.87	1.96	2.3
15.745	2.86	1.95	2.28
15.75	2.83	1.88	2.29
15.755	2.79	1.86	2.28
15.76	2.95	1.85	2.26
15.765	2.97	1.76	2.25
15.77	2.92	1.74	2.24
15.775	2.86	1.75	2.29
15.78	2.82	1.78	2.34
15.785	2.81	1.75	2.34
15.79	2.89	1.73	2.33
15.795	2.95	1.77	2.3
15.8	2.94	1.84	2.27
15.805	2.82	1.83	2.26
15.81	2.7	1.77	2.22
15.815	2.7	1.74	2.2
15.82	2.67	1.71	2.19
15.825	2.64	1.69	2.26
15.83	2.6	1.71	2.29
15.835	2.63	1.74	2.31
15.84	2.65	1.78	2.36
15.845	2.67	1.82	2.37
15.85	2.72	1.79	2.33
15.855	2.74	1.75	2.37
15.86	2.68	1.83	2.39
15.865	2.64	1.83	2.33
15.87	2.65	1.77	2.27
15.875	2.67	1.77	2.21
15.88	2.66	1.77	2.19
15.885	2.63	1.77	2.17
15.89	2.58	1.76	2.16
15.895	2.59	1.7	2.15
15.9	2.62	1.66	2.22
15.905	2.65	1.65	2.24
15.91	2.72	1.65	2.25
15.915	2.8	1.67	2.31
15.92	2.83	1.69	2.37
15.925	2.82	1.72	2.4
15.93	2.84	1.79	2.4
15.935	2.85	1.85	2.41
15.94	2.88	1.81	2.39
15.945	2.89	1.79	2.38
15.95	2.74	1.79	2.31
15.955	2.58	1.77	2.24
15.96	2.53	1.77	2.2
15.965	2.43	1.78	2.16
15.97	2.41	1.71	2.12
15.975	2.4	1.64	2.06
15.98	2.36	1.64	2.07
15.985	2.36	1.65	2.06
15.99	2.42	1.61	2.07
15.995	2.44	1.55	2.05
16	2.36	1.54	2.05
16.005	2.35	1.56	2.1
16.01	2.38	1.58	2.1
16.015	2.35	1.56	2.12
16.02	2.3	1.56	2.09
16.025	2.31	1.56	2.08
16.03	2.37	1.56	2.03
16.035	2.37	1.59	2.09
16.04	2.38	1.63	2.08
16.045	2.29	1.59	2.05
16.05	2.36	1.52	2.07
16.055	2.42	1.51	2.11
16.06	2.37	1.56	2.09
16.065	2.37	1.6	2.1
16.07	2.37	1.57	2.11
16.075	2.28	1.56	2.04
16.08	2.3	1.61	2.11
16.085	2.4	1.69	2.18
16.09	2.39	1.7	2.15
16.095	2.37	1.69	2.11
16.1	2.38	1.71	2.09
16.105	2.35	1.69	2.06
16.11	2.41	1.59	2.05
16.115	2.39	1.57	2.03
16.12	2.38	1.54	2.08
16.125	2.36	1.54	2.1
16.13	2.3	1.58	2.11
16.135	2.28	1.54	2.11
16.14	2.25	1.57	2.07
16.145	2.22	1.6	2.06
16.15	2.25	1.54	2.04
16.155	2.33	1.5	2.05
16.16	2.36	1.53	2.07
16.165	2.31	1.53	2.08
16.17	2.29	1.49	2.01
16.175	2.34	1.49	1.97
16.18	2.36	1.49	2
16.185	2.32	1.49	2.09
16.19	2.38	1.5	2.12
16.195	2.44	1.49	2.12
16.2	2.42	1.49	2.15
16.205	2.4	1.49	2.2
16.21	2.44	1.5	2.2
16.215	2.45	1.53	2.16
16.22	2.43	1.57	2.18
16.225	2.42	1.56	2.19
16.23	2.46	1.61	2.22
16.235	2.47	1.66	2.24
16.24	2.41	1.71	2.25
16.245	2.38	1.75	2.27
16.25	2.45	1.75	2.23
16.255	2.49	1.7	2.19
16.26	2.47	1.68	2.2
16.265	2.53	1.7	2.23
16.27	2.6	1.73	2.23
16.275	2.61	1.71	2.2
16.28	2.5	1.69	2.17
16.285	2.56	1.73	2.13
16.29	2.54	1.74	2.14
16.295	2.47	1.72	2.19
16.3	2.42	1.71	2.2
16.305	2.39	1.68	2.16
16.31	2.3	1.62	2.14
16.315	2.29	1.58	2.08
16.32	2.31	1.55	2.01
16.325	2.28	1.52	1.97
16.33	2.26	1.51	1.97
16.335	2.25	1.48	1.97
16.34	2.25	1.46	1.96
16.345	2.22	1.43	1.92
16.35	2.2	1.44	1.99
16.355	2.21	1.47	1.96
16.36	2.25	1.49	1.91
16.365	2.34	1.48	1.9
16.37	2.37	1.46	1.97
16.375	2.37	1.46	1.99
16.38	2.33	1.47	1.98
16.385	2.28	1.49	2.02
16.39	2.16	1.54	2.05
16.395	2.17	1.55	2.01
16.4	2.21	1.54	1.98
16.405	2.26	1.53	2
16.41	2.33	1.52	2.14
16.415	2.32	1.45	2.15
16.42	2.28	1.45	2.12
16.425	2.28	1.44	2.09
16.43	2.27	1.49	2.09
16.435	2.27	1.49	2.03
16.44	2.23	1.44	2
16.445	2.16	1.44	1.99
16.45	2.14	1.39	1.98
16.455	2.14	1.37	2.01
16.46	2.15	1.38	2.01
16.465	2.17	1.38	2.01
16.47	2.17	1.4	1.99
16.475	2.15	1.44	1.98
16.48	2.2	1.44	1.99
16.485	2.24	1.47	2.01
16.49	2.23	1.48	1.94
16.495	2.19	1.49	1.92
16.5	2.19	1.47	1.95
16.505	2.16	1.45	1.95
16.51	2.15	1.45	1.99
16.515	2.12	1.46	1.99
16.52	2.16	1.46	1.98
16.525	2.23	1.47	1.98
16.53	2.3	1.52	1.99
16.535	2.3	1.56	2.03
16.54	2.31	1.54	2.04
16.545	2.26	1.54	2.03
16.55	2.26	1.51	2.02
16.555	2.25	1.49	1.99
16.56	2.18	1.51	1.95
16.565	2.11	1.51	1.94
16.57	2.1	1.51	1.98
16.575	2.13	1.5	1.97
16.58	2.14	1.47	1.96
16.585	2.07	1.45	1.95
16.59	2.11	1.45	1.94
16.595	2.1	1.44	1.95
16.6	2.14	1.46	1.96
16.605	2.2	1.41	1.97
16.61	2.28	1.39	2.01
16.615	2.29	1.36	1.99
16.62	2.29	1.43	1.96
16.625	2.31	1.45	2
16.63	2.33	1.52	2.04
16.635	2.31	1.52	2.05
16.64	2.23	1.53	2
16.645	2.24	1.52	1.97
16.65	2.25	1.5	1.98
16.655	2.23	1.5	1.97
16.66	2.19	1.51	1.95
16.665	2.17	1.48	1.96
16.67	2.2	1.5	1.98
16.675	2.23	1.52	2.02
16.68	2.2	1.48	2.04
16.685	2.24	1.42	2
16.69	2.26	1.43	1.98
16.695	2.22	1.45	1.98
16.7	2.16	1.39	2.01
16.705	2.17	1.42	2.03
16.71	2.2	1.47	2.02
16.715	2.23	1.47	1.98
16.72	2.27	1.49	1.94
16.725	2.23	1.52	1.95
16.73	2.23	1.48	1.99
16.735	2.23	1.46	2
16.74	2.19	1.5	1.98
16.745	2.2	1.5	1.99
16.75	2.21	1.48	1.95
16.755	2.19	1.48	1.95
16.76	2.15	1.51	1.97
16.765	2.15	1.56	1.94
16.77	2.1	1.53	1.87
16.775	2.06	1.48	1.92
16.78	2.09	1.49	1.96
16.785	2.13	1.51	1.97
16.79	2.05	1.5	2.01
16.795	2.06	1.47	2.03
16.8	2.15	1.43	1.99
16.805	2.17	1.42	1.99
16.81	2.23	1.47	2.01
16.815	2.24	1.49	2
16.82	2.21	1.47	1.99
16.825	2.24	1.47	2.03
16.83	2.26	1.49	1.96
16.835	2.26	1.49	1.98
16.84	2.25	1.53	2.06
16.845	2.27	1.55	2.01
16.85	2.27	1.55	2.02
16.855	2.27	1.52	2.04
16.86	2.26	1.56	2.01
16.865	2.27	1.57	1.99
16.87	2.21	1.58	2.1
16.875	2.17	1.54	2.1
16.88	2.22	1.49	2.03
16.885	2.27	1.48	2
16.89	2.16	1.49	2
16.895	2.1	1.48	1.99
16.9	2.08	1.45	1.98
16.905	2.13	1.46	1.99
16.91	2.21	1.48	1.96
16.915	2.21	1.49	1.97
16.92	2.18	1.5	1.96
16.925	2.18	1.48	1.92
16.93	2.19	1.5	1.93
16.935	2.19	1.55	1.93
16.94	2.16	1.51	1.93
16.945	2.21	1.42	1.91
16.95	2.17	1.38	1.93
16.955	2.1	1.41	1.93
16.96	2.1	1.46	1.96
16.965	2.14	1.45	1.93
16.97	2.2	1.46	1.92
16.975	2.25	1.48	1.96
16.98	2.33	1.51	2.04
16.985	2.38	1.5	2.13
16.99	2.42	1.48	2.19
16.995	2.45	1.6	2.26
17	2.55	1.61	2.28
17.005	2.71	1.62	2.37
17.01	2.87	1.75	2.41
17.015	2.93	1.87	2.4
17.02	2.92	1.92	2.48
17.025	2.85	2	2.46
17.03	2.84	2.07	2.39
17.035	2.67	2.06	2.3
17.04	2.6	2.03	2.27
17.045	2.54	1.98	2.3
17.05	2.44	1.88	2.24
17.055	2.4	1.79	2.23
17.06	2.33	1.76	2.15
17.065	2.24	1.72	2.1
17.07	2.23	1.67	2.09
17.075	2.35	1.66	2.1
17.08	2.21	1.63	2.12
17.085	2.22	1.58	2.1
17.09	2.21	1.62	2.08
17.095	2.17	1.62	2.1
17.1	2.14	1.57	2.13
17.105	2.15	1.6	2.12
17.11	2.14	1.59	2.06
17.115	2.16	1.54	2.02
17.12	2.16	1.52	1.9
17.125	2.17	1.61	1.87
17.13	2.21	1.61	1.87
17.135	2.23	1.56	1.9
17.14	2.17	1.51	1.94
17.145	2.12	1.48	1.97
17.15	2.17	1.5	1.98
17.155	2.23	1.5	1.97
17.16	2.24	1.48	1.87
17.165	2.19	1.47	1.94
17.17	2.13	1.44	1.95
17.175	2.12	1.49	1.97
17.18	2.16	1.49	2
17.185	2.18	1.46	2.04
17.19	2.18	1.46	2.03
17.195	2.14	1.49	2
17.2	2.14	1.49	1.98
17.205	2.2	1.51	1.98
17.21	2.21	1.49	2.02
17.215	2.25	1.52	2.07
17.22	2.23	1.5	2.03
17.225	2.16	1.47	1.99
17.23	2.15	1.47	1.94
17.235	2.19	1.43	1.93
17.24	2.18	1.43	1.99
17.245	2.18	1.42	2.01
17.25	2.18	1.44	2.03
17.255	2.19	1.47	2
17.26	2.25	1.51	1.99
17.265	2.25	1.51	1.99
17.27	2.23	1.47	2.04
17.275	2.25	1.51	2.11
17.28	2.28	1.5	2.16
17.285	2.29	1.52	2.13
17.29	2.26	1.46	2.09
17.295	2.24	1.5	2.1
17.3	2.28	1.5	2.08
17.305	2.28	1.53	2.04
17.31	2.21	1.53	2.01
17.315	2.18	1.52	2.06
17.32	2.14	1.56	2.08
17.325	2.12	1.56	2.06
17.33	2.11	1.55	1.95
17.335	2.05	1.52	1.89
17.34	2.11	1.5	1.95
17.345	2.18	1.47	1.97
17.35	2.16	1.47	1.91
17.355	2.09	1.43	1.88
17.36	2.09	1.43	1.86
17.365	2.14	1.47	1.91
17.37	2.21	1.46	1.95
17.375	2.22	1.44	1.93
17.38	2.23	1.49	1.9
17.385	2.14	1.47	1.92
17.39	2.07	1.45	1.95
17.395	2.16	1.47	1.99
17.4	2.29	1.46	1.92
17.405	2.28	1.41	1.9
17.41	2.24	1.39	1.94
17.415	2.24	1.4	1.97
17.42	2.26	1.47	2
17.425	2.29	1.51	2.03
17.43	2.33	1.5	2.02
17.435	2.34	1.51	2.02
17.44	2.36	1.56	2.01
17.445	2.38	1.59	2.02
17.45	2.34	1.57	2.03
17.455	2.31	1.54	2.04
17.46	2.27	1.55	2.01
17.465	2.23	1.57	1.99
17.47	2.16	1.57	2
17.475	2.15	1.51	2.02
17.48	2.18	1.43	2.01
17.485	2.17	1.45	2
17.49	2.16	1.47	1.96
17.495	2.13	1.45	1.91
17.5	2.1	1.38	1.9
17.505	2.12	1.35	1.91
17.51	2.14	1.41	1.9
17.515	2.09	1.44	1.87
17.52	2.13	1.43	1.91
17.525	2.16	1.43	1.95
17.53	2.2	1.41	1.98
17.535	2.19	1.41	1.98
17.54	2.13	1.43	1.96
17.545	2.18	1.45	1.96
17.55	2.23	1.42	1.96
17.555	2.09	1.39	1.99
17.56	2.04	1.46	1.93
17.565	2.14	1.47	1.91
17.57	2.19	1.43	1.97
17.575	2.21	1.44	2.03
17.58	2.23	1.46	2.05
17.585	2.28	1.49	2.12
17.59	2.26	1.5	2.15
17.595	2.26	1.59	2.15
17.6	2.31	1.63	2.16
17.605	2.31	1.59	2.15
17.61	2.33	1.61	2.16
17.615	2.38	1.65	2.15
17.62	2.46	1.69	2.18
17.625	2.5	1.69	2.2
17.63	2.46	1.64	2.17
17.635	2.46	1.59	2.13
17.64	2.43	1.56	2.13
17.645	2.44	1.59	2.14
17.65	2.45	1.63	2.18
17.655	2.44	1.64	2.28
17.66	2.5	1.66	2.27
17.665	2.53	1.67	2.26
17.67	2.49	1.67	2.27
17.675	2.52	1.68	2.22
17.68	2.56	1.72	2.25
17.685	2.56	1.72	2.36
17.69	2.57	1.74	2.39
17.695	2.64	1.74	2.37
17.7	2.69	1.75	2.41
17.705	2.77	1.78	2.37
17.71	2.79	1.81	2.33
17.715	2.86	1.8	2.4
17.72	2.97	1.84	2.44
17.725	3.04	1.89	2.45
17.73	3.03	1.98	2.49
17.735	2.93	1.98	2.53
17.74	2.82	1.99	2.47
17.745	2.76	2	2.4
17.75	2.79	2.04	2.44
17.755	2.65	2.06	2.43
17.76	2.42	1.99	2.35
17.765	2.29	1.86	2.25
17.77	2.28	1.74	2.17
17.775	2.34	1.71	2.17
17.78	2.38	1.72	2.19
17.785	2.34	1.66	2.14
17.79	2.25	1.59	2.04
17.795	2.28	1.54	1.97
17.8	2.28	1.48	1.99
17.805	2.24	1.49	2
17.81	2.2	1.53	1.97
17.815	2.21	1.48	1.94
17.82	2.22	1.44	1.91
17.825	2.22	1.45	1.93
17.83	2.24	1.45	1.92
17.835	2.2	1.47	1.97
17.84	2.2	1.5	2.04
17.845	2.28	1.46	2.02
17.85	2.35	1.41	2.05
17.855	2.51	1.44	2.2
17.86	2.82	1.49	2.43
17.865	3.15	1.6	2.79
17.87	3.58	1.7	3.34
17.875	4.23	1.93	4.02
17.88	5.03	2.3	4.89
17.885	6.03	2.82	6.04
17.89	7.19	3.46	7.2
17.895	8.37	4.22	8.38
17.9	9.6	5.25	9.72
17.905	10.59	6.74	10.92
17.91	11.13	8.35	11.71
17.915	11.29	9.57	12.23
17.92	11.1	10.51	12.06
17.925	10.53	11.29	10.87
17.93	9.27	11.43	9.37
17.935	7.81	10.8	8.05
17.94	6.61	9.87	6.94
17.945	5.77	8.74	5.97
17.95	5.23	7.35	5.07
17.955	4.8	5.94	4.43
17.96	4.37	4.79	3.96
17.965	4.05	3.93	3.65
17.97	3.85	3.36	3.49
17.975	3.74	3	3.34
17.98	3.67	2.7	3.22
17.985	3.56	2.5	3.14
17.99	3.46	2.42	3.1
17.995	3.47	2.37	3.02
18	3.4	2.33	2.92
18.005	3.35	2.28	2.88
18.01	3.31	2.26	2.81
18.015	3.25	2.21	2.72
18.02	3.2	2.16	2.74
18.025	3.18	2.13	2.81
18.03	3.22	2.16	2.81
18.035	3.22	2.16	2.78
18.04	3.17	2.12	2.76
18.045	3.16	2.07	2.7
18.05	3.19	2.06	2.67
18.055	3.18	2.08	2.67
18.06	3.1	2.06	2.68
18.065	3.13	2.06	2.69
18.07	3.15	2.09	2.67
18.075	3.2	2.09	2.69
18.08	3.26	2.08	2.74
18.085	3.33	2.1	2.73
18.09	3.41	2.15	2.72
18.095	3.42	2.19	2.83
18.1	3.5	2.23	2.89
18.105	3.6	2.29	2.89
18.11	3.6	2.38	2.89
18.115	3.63	2.47	2.96
18.12	3.66	2.52	2.97
18.125	3.59	2.55	2.94
18.13	3.56	2.52	2.85
18.135	3.55	2.47	2.79
18.14	3.47	2.46	2.79
18.145	3.4	2.41	2.85
18.15	3.4	2.35	2.82
18.155	3.38	2.36	2.77
18.16	3.31	2.3	2.74
18.165	3.3	2.22	2.7
18.17	3.32	2.17	2.69
18.175	3.28	2.13	2.61
18.18	3.26	2.14	2.55
18.185	3.24	2.09	2.55
18.19	3.21	2.02	2.55
18.195	3.2	1.96	2.58
18.2	3.22	1.96	2.59
18.205	3.28	1.97	2.64
18.21	3.43	1.97	2.71
18.215	3.69	1.99	2.89
18.22	3.97	2.06	3.16
18.225	4.36	2.19	3.47
18.23	4.99	2.31	3.84
18.235	5.72	2.52	4.4
18.24	6.6	2.8	5
18.245	7.61	3.2	5.49
18.25	8.48	3.64	5.94
18.255	9.17	4.11	6.42
18.26	9.65	4.68	6.77
18.265	9.79	5.28	6.91
18.27	9.64	5.66	6.79
18.275	9.4	5.92	6.49
18.28	8.76	6.04	5.99
18.285	7.78	5.86	5.43
18.29	6.88	5.59	4.87
18.295	6.08	5.3	4.36
18.3	5.49	4.75	3.99
18.305	4.95	4.09	3.63
18.31	4.41	3.53	3.27
18.315	4	3.09	3.04
18.32	3.76	2.75	2.94
18.325	3.63	2.49	2.84
18.33	3.58	2.33	2.74
18.335	3.44	2.18	2.66
18.34	3.32	2.09	2.67
18.345	3.27	2.03	2.69
18.35	3.26	1.92	2.69
18.355	3.29	1.88	2.63
18.36	3.28	1.85	2.59
18.365	3.27	1.86	2.59
18.37	3.26	1.82	2.64
18.375	3.32	1.83	2.7
18.38	3.44	1.87	2.69
18.385	3.48	1.92	2.74
18.39	3.56	1.93	2.87
18.395	3.65	1.94	3.01
18.4	3.77	2.05	3.07
18.405	3.88	2.21	3.17
18.41	3.97	2.31	3.29
18.415	4.08	2.42	3.39
18.42	4.16	2.59	3.4
18.425	4.2	2.74	3.37
18.43	4.13	2.81	3.31
18.435	3.93	2.82	3.22
18.44	3.74	2.82	3.11
18.445	3.69	2.76	3.03
18.45	3.6	2.64	2.9
18.455	3.44	2.51	2.7
18.46	3.35	2.34	2.62
18.465	3.22	2.21	2.58
18.47	3.11	2.07	2.53
18.475	3.05	2.05	2.52
18.48	3.03	2.02	2.51
18.485	3.09	2	2.5
18.49	3.07	1.88	2.48
18.495	3.13	1.85	2.49
18.5	3.16	1.86	2.45
18.505	3.15	1.84	2.46
18.51	3.11	1.8	2.49
18.515	3.07	1.74	2.54
18.52	3.05	1.75	2.5
18.525	3.05	1.79	2.53
18.53	3.05	1.82	2.55
18.535	3.06	1.86	2.51
18.54	3.06	1.88	2.51
18.545	3.11	1.88	2.54
18.55	3.12	1.87	2.52
18.555	3.12	1.84	2.52
18.56	3.2	1.84	2.57
18.565	3.22	1.85	2.62
18.57	3.28	1.91	2.65
18.575	3.43	1.95	2.7
18.58	3.52	1.98	2.75
18.585	3.65	2.02	2.75
18.59	3.83	2.12	2.84
18.595	3.95	2.28	2.97
18.6	4.09	2.43	3.12
18.605	4.26	2.59	3.25
18.61	4.41	2.76	3.37
18.615	4.43	2.84	3.37
18.62	4.37	2.91	3.29
18.625	4.42	2.97	3.25
18.63	4.39	2.96	3.25
18.635	4.24	2.95	3.22
18.64	4.08	2.84	3.1
18.645	3.93	2.75	2.99
18.65	3.79	2.62	2.98
18.655	3.69	2.48	2.9
18.66	3.61	2.37	2.8
18.665	3.53	2.28	2.7
18.67	3.48	2.27	2.65
18.675	3.41	2.21	2.62
18.68	3.26	2.07	2.66
18.685	3.2	1.99	2.68
18.69	3.2	2.02	2.62
18.695	3.17	2.02	2.57
18.7	3.12	1.97	2.57
18.705	3.23	1.94	2.55
18.71	3.3	1.92	2.54
18.715	3.33	1.92	2.54
18.72	3.25	1.92	2.52
18.725	3.23	1.91	2.55
18.73	3.3	1.92	2.69
18.735	3.4	1.96	2.82
18.74	3.55	2.01	2.85
18.745	3.67	2.03	2.88
18.75	3.81	2.15	2.99
18.755	3.92	2.31	3.12
18.76	3.9	2.42	3.13
18.765	3.88	2.46	3.12
18.77	3.86	2.61	3.07
18.775	3.75	2.72	3.13
18.78	3.65	2.74	3.13
18.785	3.58	2.72	3
18.79	3.52	2.67	2.85
18.795	3.44	2.52	2.81
18.8	3.31	2.39	2.79
18.805	3.26	2.28	2.74
18.81	3.25	2.22	2.64
18.815	3.17	2.09	2.55
18.82	3.11	2.01	2.52
18.825	3.16	1.97	2.53
18.83	3.21	1.96	2.56
18.835	3.18	1.98	2.53
18.84	3.09	1.99	2.49
18.845	3.07	1.95	2.42
18.85	3.11	1.93	2.34
18.855	3.07	1.94	2.36
18.86	3.12	1.99	2.44
18.865	3.14	1.99	2.49
18.87	3.16	1.93	2.5
18.875	3.2	1.9	2.49
18.88	3.29	1.9	2.56
18.885	3.42	1.95	2.6
18.89	3.57	1.97	2.69
18.895	3.76	2.01	2.75
18.9	3.95	2.11	2.83
18.905	4.12	2.16	2.92
18.91	4.3	2.2	3
18.915	4.49	2.32	3.11
18.92	4.65	2.42	3.19
18.925	4.62	2.51	3.17
18.93	4.5	2.51	3.18
18.935	4.41	2.48	3.15
18.94	4.32	2.52	3.07
18.945	4.15	2.55	2.95
18.95	3.97	2.54	2.84
18.955	3.76	2.45	2.74
18.96	3.57	2.34	2.67
18.965	3.49	2.3	2.65
18.97	3.42	2.25	2.62
18.975	3.27	2.13	2.58
18.98	3.28	2.06	2.57
18.985	3.33	2	2.55
18.99	3.37	1.94	2.51
18.995	3.25	1.94	2.44
19	3.18	1.92	2.44
19.005	3.16	1.91	2.45
19.01	3.15	1.92	2.46
19.015	3.12	1.9	2.5
19.02	3.03	1.82	2.5
19.025	3.01	1.78	2.46
19.03	3.05	1.82	2.48
19.035	3.04	1.89	2.52
19.04	3.07	1.88	2.55
19.045	3.1	1.85	2.54
19.05	3.12	1.85	2.52
19.055	3.13	1.87	2.51
19.06	3.1	1.91	2.57
19.065	3.04	1.94	2.59
19.07	3.01	1.95	2.54
19.075	3.09	1.96	2.48
19.08	3.1	1.95	2.44
19.085	3.11	1.97	2.45
19.09	3.12	1.94	2.47
19.095	3.07	1.9	2.48
19.1	2.97	1.87	2.45
19.105	2.93	1.83	2.42
19.11	2.96	1.83	2.4
19.115	2.92	1.86	2.4
19.12	2.89	1.83	2.38
19.125	2.86	1.79	2.38
19.13	2.88	1.78	2.42
19.135	2.86	1.82	2.44
19.14	2.83	1.82	2.45
19.145	2.88	1.84	2.46
19.15	2.94	1.85	2.42
19.155	2.92	1.79	2.37
19.16	2.84	1.81	2.37
19.165	2.89	1.8	2.38
19.17	2.9	1.78	2.39
19.175	2.89	1.8	2.38
19.18	2.81	1.84	2.36
19.185	2.76	1.83	2.33
19.19	2.76	1.8	2.31
19.195	2.77	1.73	2.38
19.2	2.78	1.68	2.44
19.205	2.82	1.68	2.41
19.21	2.84	1.69	2.37
19.215	2.82	1.72	2.37
19.22	2.81	1.72	2.44
19.225	2.82	1.74	2.53
19.23	2.87	1.78	2.51
19.235	2.9	1.78	2.5
19.24	2.92	1.77	2.53
19.245	2.88	1.83	2.53
19.25	2.83	1.95	2.51
19.255	2.85	1.99	2.48
19.26	2.88	2	2.51
19.265	2.84	2.02	2.55
19.27	2.83	2	2.52
19.275	2.72	1.96	2.51
19.28	2.73	1.89	2.49
19.285	2.74	1.81	2.4
19.29	2.8	1.8	2.36
19.295	2.86	1.8	2.41
19.3	2.94	1.75	2.49
19.305	2.99	1.74	2.53
19.31	3.19	1.78	2.71
19.315	3.39	1.88	2.89
19.32	3.55	2	3.1
19.325	3.8	2.16	3.37
19.33	4.15	2.34	3.64
19.335	4.46	2.61	3.89
19.34	4.77	2.86	4.09
19.345	4.93	3.13	4.24
19.35	5.01	3.44	4.44
19.355	5.12	3.7	4.56
19.36	5.03	3.94	4.42
19.365	4.76	4.1	4.02
19.37	4.41	3.98	3.75
19.375	4.04	3.78	3.53
19.38	3.79	3.6	3.24
19.385	3.56	3.28	3.04
19.39	3.3	2.95	2.88
19.395	3.13	2.69	2.7
19.4	3.02	2.43	2.5
19.405	2.94	2.23	2.35
19.41	2.91	2.11	2.34
19.415	2.9	1.99	2.39
19.42	2.9	1.85	2.37
19.425	2.84	1.81	2.32
19.43	2.76	1.81	2.35
19.435	2.84	1.76	2.35
19.44	2.87	1.76	2.31
19.445	2.88	1.72	2.3
19.45	2.86	1.72	2.3
19.455	2.86	1.77	2.32
19.46	2.85	1.8	2.32
19.465	2.8	1.83	2.29
19.47	2.76	1.79	2.3
19.475	2.74	1.76	2.38
19.48	2.79	1.77	2.33
19.485	2.81	1.76	2.38
19.49	2.78	1.75	2.38
19.495	2.77	1.79	2.31
19.5	2.85	1.78	2.3
19.505	2.91	1.75	2.27
19.51	2.93	1.7	2.24
19.515	2.82	1.68	2.25
19.52	2.77	1.72	2.31
19.525	2.72	1.7	2.25
19.53	2.67	1.67	2.22
19.535	2.66	1.65	2.21
19.54	2.64	1.66	2.19
19.545	2.69	1.61	2.21
19.55	2.7	1.62	2.22
19.555	2.69	1.66	2.24
19.56	2.7	1.68	2.27
19.565	2.71	1.7	2.32
19.57	2.74	1.69	2.32
19.575	2.77	1.63	2.29
19.58	2.73	1.62	2.27
19.585	2.73	1.62	2.26
19.59	2.74	1.66	2.26
19.595	2.72	1.75	2.24
19.6	2.75	1.78	2.22
19.605	2.77	1.77	2.2
19.61	2.77	1.74	2.23
19.615	2.74	1.7	2.27
19.62	2.7	1.69	2.24
19.625	2.71	1.67	2.24
19.63	2.67	1.68	2.19
19.635	2.57	1.66	2.06
19.64	2.58	1.63	2.09
19.645	2.57	1.65	2.15
19.65	2.61	1.65	2.1
19.655	2.67	1.64	2.09
19.66	2.63	1.62	2.12
19.665	2.59	1.65	2.14
19.67	2.62	1.64	2.11
19.675	2.59	1.62	2.11
19.68	2.58	1.59	2.09
19.685	2.58	1.58	2.1
19.69	2.53	1.55	2.07
19.695	2.56	1.52	2.06
19.7	2.63	1.56	2.08
19.705	2.66	1.54	2.11
19.71	2.61	1.55	2.15
19.715	2.65	1.56	2.18
19.72	2.67	1.52	2.17
19.725	2.6	1.53	2.15
19.73	2.57	1.58	2.16
19.735	2.57	1.63	2.19
19.74	2.59	1.64	2.2
19.745	2.57	1.59	2.17
19.75	2.54	1.58	2.13
19.755	2.53	1.62	2.12
19.76	2.53	1.62	2.1
19.765	2.54	1.57	2.09
19.77	2.58	1.58	2.14
19.775	2.59	1.6	2.18
19.78	2.54	1.58	2.15
19.785	2.44	1.56	2.12
19.79	2.45	1.57	2.16
19.795	2.54	1.57	2.1
19.8	2.54	1.54	2.06
19.805	2.5	1.52	2.08
19.81	2.47	1.56	2.11
19.815	2.42	1.56	2.11
19.82	2.46	1.55	2.1
19.825	2.47	1.53	2.13
19.83	2.44	1.53	2.16
19.835	2.41	1.53	2.11
19.84	2.42	1.51	2.09
19.845	2.48	1.53	2.11
19.85	2.53	1.54	2.14
19.855	2.52	1.51	2.19
19.86	2.6	1.48	2.22
19.865	2.56	1.5	2.16
19.87	2.48	1.56	2.11
19.875	2.49	1.6	2.11
19.88	2.45	1.63	2.11
19.885	2.41	1.59	2.15
19.89	2.43	1.56	2.17
19.895	2.46	1.58	2.13
19.9	2.5	1.58	2.09
19.905	2.48	1.55	2.09
19.91	2.48	1.58	2.08
19.915	2.54	1.56	2.05
19.92	2.62	1.55	2.11
19.925	2.59	1.55	2.19
19.93	2.62	1.58	2.19
19.935	2.64	1.6	2.21
19.94	2.66	1.64	2.18
19.945	2.71	1.72	2.23
19.95	2.71	1.73	2.27
19.955	2.73	1.71	2.34
19.96	2.77	1.67	2.35
19.965	2.8	1.7	2.25
19.97	2.78	1.72	2.19
19.975	2.75	1.74	2.16
19.98	2.7	1.78	2.13
[truncated: 1,204 more rows]
