# Supplementary material for: Effect of process parameters on woody biomass fractionation in a methanol/water mixture in a semi-flow reactor
Source: Royal Society of Chemistry journal article supplement (doi:10.1039/d4ya00261j), 2024-01-01
Supplement: d4ya00261j9.pdf [file d4ya00261j9.pdf]

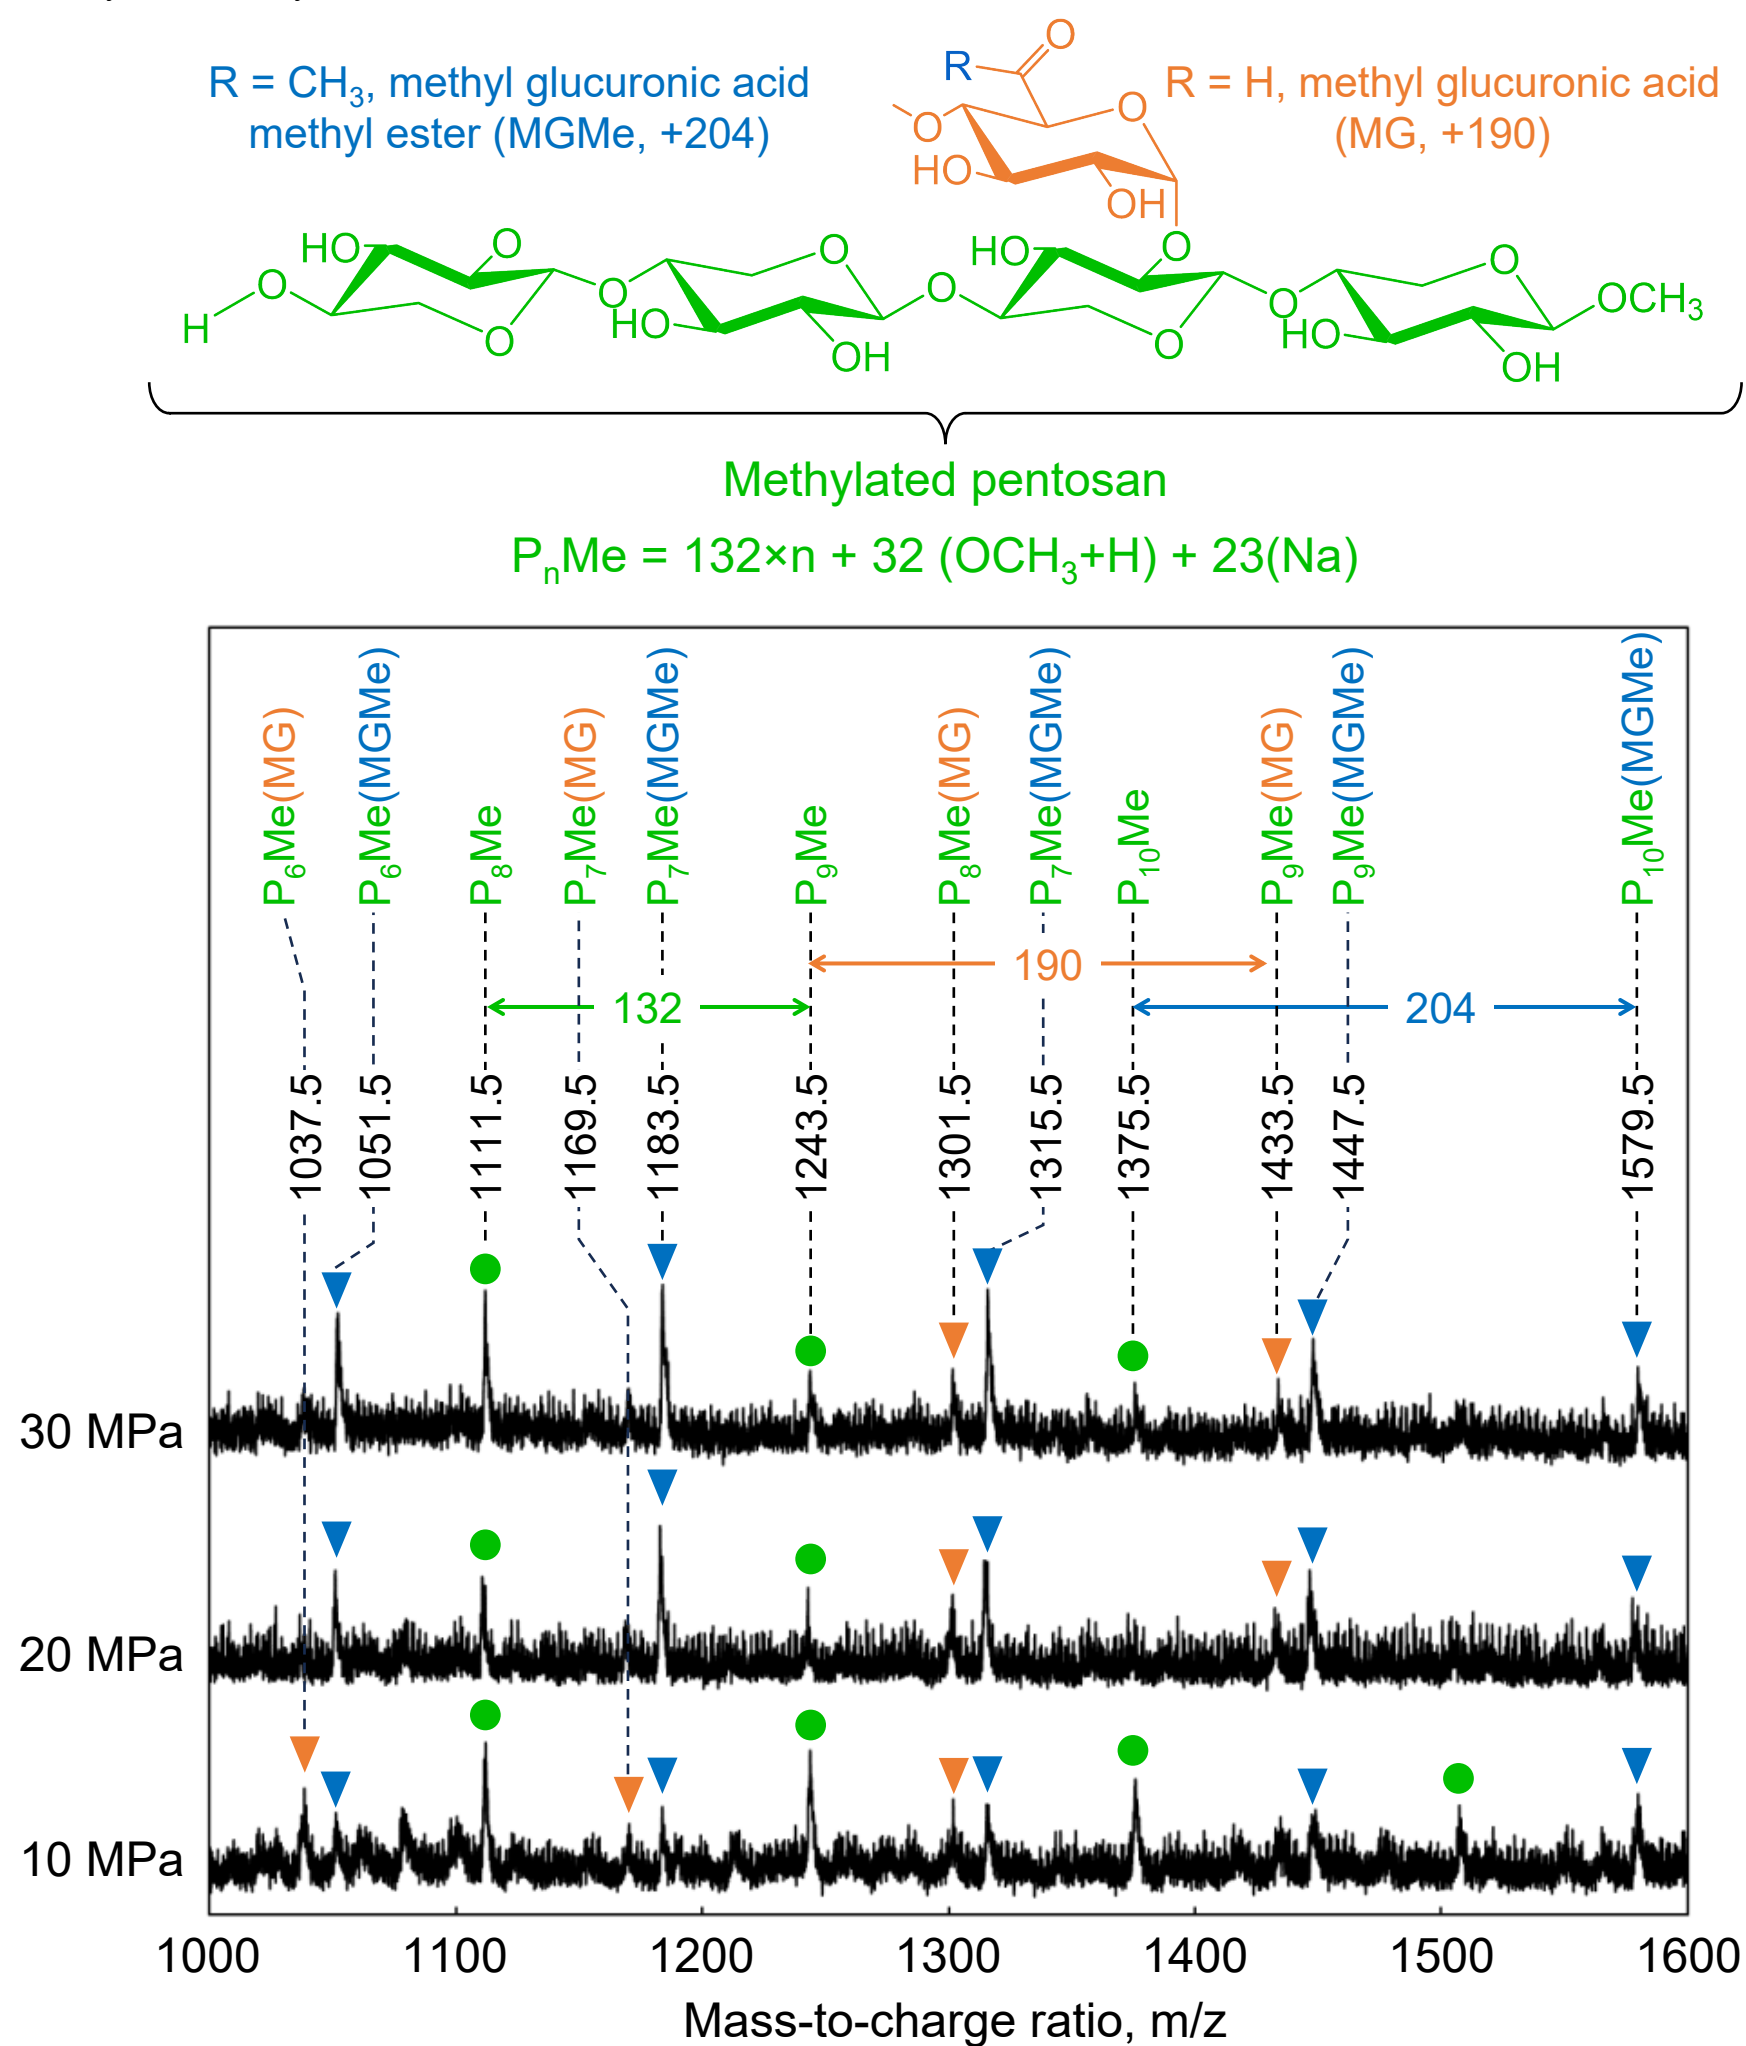

Figure 8. Matrix-assisted laser desorption ionization-time-of-flight mass spectra of oligosaccharides obtained from holocellulose after treatment with methanol/water (90/10, v/v) at various pressures.

These data cannot be provided in numerical format and are therefore provided as image data.
